# Supplementary material
Source: PubMed Central journal article supplement (PMC4159703)

## Supporting Information

### Table of Contents

|                                                            |     |
|------------------------------------------------------------|-----|
| Materials and Methods.....                                 | S2  |
| Ni-Catalyzed Heck Reactions .....                          | S4  |
| Synthesis of Substrates and Authentic Product Samples..... | S33 |
| Further Reaction Optimization Tables.....                  | S38 |
| <sup>1</sup> H and <sup>13</sup> C NMR Spectra.....        | S42 |

## Materials and Methods

All reactions were performed under an inert atmosphere of nitrogen with exclusion of moisture from reagents and glassware unless otherwise noted. All Ni-catalyzed coupling reactions were carried out in a glovebox (MBraun Unilab) filled with dry nitrogen. Heating was carried out using a Chemglass dryblock stir plate within the glovebox. Ni(cod)<sub>2</sub> and Ligand **1** were purchased from Strem Chemicals (Newburyport, MA) and stored in the glovebox. Ni(cod)<sub>2</sub> was stored at -20 °C, and it is crucial that it is a bright yellow color. Samples that appeared yellow-grey gave reduced yields. Toluene, THF, diethyl ether, and dichloromethane were degassed by sparging with nitrogen and dried by passage through a column of activated alumina on an SG Water solvent purification system. Aryl triflates, chlorides, and sulfonates were either purchased from commercial vendors and sparged with nitrogen before use, or prepared using standard procedures<sup>1</sup> then sparged with nitrogen and dried over 3 Å MS. 1-octene, vinylcyclohexane, (-)-β-citronellene, saffrole, and allyl benzene were distilled from Na prior to use. Other alkenes were used as purchased after sparging with nitrogen. Triethylsilyl trifluoromethanesulfonate (TESOTf) was distilled from CaH<sub>2</sub> under reduced pressure prior to use to give best yields. Alternatively, TESOTf can be used directly from the manufacturer though some reduction in yield was obtained, particularly if the solution was a dark brown rather than colorless (indicating purity). All other reagents (including DABCO) were used as received. Commercially available chemicals were purchased from either Sigma-Aldrich Chemical Company (Milwaukee, WI), Alfa Aesar (Ward Hill, MA), Acros Organics (Pittsburgh, PA), or TCI America (Portland, OR). Analytical thin-

---

<sup>1</sup> (a) Triflates and Mesylates: Kleimark, J.; Hedström, A.; Larsson, P.-F.; Johansson, C.; Norrby, P.-O. *ChemCatChem*, **2009**, *1*, 152–161. (b) 2-naphthyl tosylate: Ogata, T.; Hartwig, J. F. *J. Am. Chem. Soc.* **2008**, *130*, 13848–13849. (c) Sulfamate: Quasdorf, K. W.; Andoht-Finch, A.; Liu, P.; Silberstein, A. L.; Komaromi, A.; Blackburn, T.; Ramgren, S. D.; Houk, K. N.; Snieckus, V.; Garg, N. K. *J. Am. Chem. Soc.* **2011**, *133*, 6352–6363.

layer chromatography (TLC) was performed on 0.2 mm coated Science silica gel (EM 60-F254) plates. Visualization was accomplished with UV light (254 nm) and exposure to either ceric ammonium molybdate (CAM), anisaldehyde, or  $\text{KMnO}_4$  solution followed by heating. Column chromatography was carried out on a Biotage Isolera flash chromatography system using SNAP KP-Sil or HP-Sil columns (silica gel, average particle size 50  $\mu\text{m}$  and 25  $\mu\text{m}$  respectively).

$^1\text{H}$  NMR Spectra were obtained on either a Bruker 400 MHz, Bruker 600 MHz, or Varian Inova 500 MHz NMR instrument;  $^{13}\text{C}$  spectra were recorded on a Bruker 400 MHz (at 100 MHz) NMR instrument. Chemical shifts ( $^1\text{H}$  and  $^{13}\text{C}$ ) are reported in parts per million and referenced to the residual solvent peak (for  $\text{CDCl}_3$ ,  $\delta = 7.27$  ppm, 77.0ppm respectively). The following designations are used to describe multiplicities: s (singlet), d (doublet), t (triplet), q (quartet), quin (quintet), m (multiplet), br (broad), app (apparent). IR spectra were obtained on an Agilent Cary 630 FT-IR spectrometer equipped with an ATR accessory. High-resolution mass spectrometry data were acquired by the Department of Chemistry Instrumentation Facility, Massachusetts Institute of Technology on a Bruker Daltonics APEXIV 4.7 Tesla FT-ICR Mass Spectrometer. Gas chromatography (GC) was performed on an Agilent 5870 GC (HP-5 column) with a flame ionization detector. GC/MS was performed on an Agilent 5870 GC (HP-5ms column) with an Agilent 5975C MSD. Dodecane (99+%, Alfa Aesar) was used as an internal standard for quantification.

## Ni-Catalyzed Heck Reactions

### General Procedures

**A) For aryl triflates:** In a glovebox, Ligand **1** (0.06 mmol, 0.12 equiv) and Ni(cod)<sub>2</sub> (0.05 mmol, 0.10 equiv) were weighed into an 8mL vial. THF (1 M), DABCO (1.5 mmol, 3.0 equiv), and alkene (0.75 mmol, 1.5 equiv) were added with stirring. The aryl triflate (0.5 mmol, 1.0 equiv) was then added, the vial was capped, and the reaction mixture was heated to 60 °C for 24 h. When completed, the reaction mixture was removed from the glovebox and 3.0 mL of benzene was added.

**B) For aryl chlorides, mesylates, tosylates, and sulfamates:** In a glovebox, Ligand **1** (0.06 mmol, 0.12 equiv) and Ni(cod)<sub>2</sub> (0.05 mmol, 0.10 equiv) were weighed into an 8mL vial. Half the toluene (0.5 M in total), DABCO (2.5 mmol, 5.0 equiv), and alkene (0.75 mmol, 1.5 equiv), and were added with stirring. The aryl chloride, mesylate, tosylate or sulfamate (0.5 mmol, 1.0 equiv) was then added, and the sides of the vial were rinsed with the remaining toluene. Triethylsilyl trifluoromethanesulfonate (TESOTf, 1.0 mmol, 2.0 equiv) was then added, the vial was capped, and the reaction mixture was heated to 60 °C for 24 h. When completed, the reaction mixture was removed from the glovebox and 400 μL of dry methanol was added to quench the remaining TESOTf and TESCl and allowed to stir at room temperature (capped) for 20 min. If this step is not carried out, water from the SiO<sub>2</sub> will form the disilyl ether, TES<sub>2</sub>O, which, for non-polar substrates can be nearly impossible to separate via column chromatography. The silyl ether TESOMe is volatile and can be removed under reduced pressure. After the methanol quench, 3.0 mL of benzene was added.

**Both A) and B):** For reactions analyzed by gas chromatography (GC), the crude mixture was passed through a plug of SiO<sub>2</sub>, using a small amount of CH<sub>2</sub>Cl<sub>2</sub> to solubilize any precipitate, and eluting with diethyl ether. An external standard (dodecane, 70.2 μL, 1.0 equiv) was then added, the sample was diluted to 50 mL in a volumetric flask and submitted to GC analysis. The desired branched product area was then compared to both the linear product area (br/ln) and to the sum of all isomers, including linear, of the product (rr). The identity of the peak corresponding to the linear product isomer was confirmed by reaction of the substrates with Ni(cod)<sub>2</sub> in the absence of Ligand **1**, giving a roughly 1:1 mixture of branched/linear products. Mechanistically, there are two sources of regioisomers: br/ln selectivity is determined in the migratory insertion step, while overall rr can be degraded later in the catalytic cycle by reinsertion of a Ni–H species to the product and subsequent isomerization. As expected, the major isomerized product is the trisubstituted *E*-styrene derivative. When very bulky monodentate phosphines are used, this is the major product. Structure confirmed by <sup>1</sup>H NMR and nOe correlation. GC conditions: 50 °C for 2 min, ramp 20 °C/min to 250 °C, hold at 250 °C for 10 min.

For isolated yields, 15 μL was removed from the mixture diluted in benzene and added to a small amount of hexanes to precipitate out any nickel species. This sample was filtered with a syringe filter into a GC vial, diluted in Et<sub>2</sub>O, and put on the GC to determine rr pre-purification. The remaining reaction mixture was passed through a short plug of SiO<sub>2</sub> and then purified via column chromatography. A small amount of the final mixture was then used to prepare another GC sample to determine rr and br/ln post purification.

### A Note on Purification

Some substrates, particularly the electron-rich alkenes such as **3b** and **3s** are prone to acid-catalyzed isomerization. This seems to be especially the case if the crude reaction mixture is loaded directly upon a silica column and eluted with hexanes. Running the reaction through a silica plug, eluting with benzene, tends to mitigate most of the isomerization, though not in every case. Therefore, an *rr* of the reaction mixture pre-purification as noted above was always obtained via GC analysis. Finally, most column chromatography was performed on Et<sub>3</sub>N-pretreated columns to avoid any further isomerization on sensitive substrates. When pre-packed silica gel Biotage columns were used for purification, and pretreatment with Et<sub>3</sub>N is noted below, columns were flushed with 5-8 column volumes (CV) of a mixture of 2% Et<sub>3</sub>N in Hexanes, then equilibrated with pure hexanes for 8 CV in order to purify non-polar products well. Refer to specific substrates below for details of purification.

### Characterization of Products

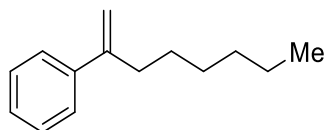

#### Oct-1-en-2-ylbenzene (**3a**):

*From PhOTf*: Following the general procedure **A**, Ligand **1** (34.2 mg, 0.06 mmol, 0.12 equiv), Ni(cod)<sub>2</sub> (13.8 mg, 0.05 mmol, 0.10 equiv), THF (500  $\mu$ L, 1 M), DABCO (168 mg, 1.5 mmol, 3.0 equiv), 1-octene (118  $\mu$ L, 0.75 mmol, 1.5 equiv), and phenyl trifluoromethanesulfonate (81  $\mu$ L, 0.5 mmol, 1.0 equiv) were added to an 8 mL vial and stirred at 60 °C for 24 h in a nitrogen-filled

glovebox. When the reaction was done, it was removed from the glovebox and 3.0 mL benzene was added. An aliquot was taken for GC analysis as described above. Complete conversion was obtained, so simple filtration through a silica plug with benzene as the eluent afforded 93.3 mg (99%) **3a** as a colorless oil (rr pre-purification: 38.3, rr post-purification: 32.9, br/ln 87:1 determined by GC analysis).

*From PhCl:* Following the general procedure **B**, Ligand **1** (34.2 mg, 0.06 mmol, 0.12 equiv), Ni(cod)<sub>2</sub> (13.8 mg, 0.05 mmol, 0.10 equiv), Toluene (500  $\mu$ L), DABCO (280 mg, 2.5 mmol, 5.0 equiv), 1-octene (118  $\mu$ L, 0.75 mmol, 1.5 equiv), and chlorobenzene (50.9  $\mu$ L, 0.5 mmol, 1.0 equiv) were added to an 8 mL vial. Toluene (500  $\mu$ L) was used to rinse down the sides of the vial, and triethylsilyl trifluoromethanesulfonate (226  $\mu$ L, 1.0 mmol, 2.0 equiv) was added, and the reaction was stirred at 60 °C for 24 h in a nitrogen-filled glovebox. When the reaction was done, it was removed from the glovebox. Dry methanol (400  $\mu$ L) was added to quench, and the reaction was stirred for 20 min at room temperature (capped). Benzene (3 mL) was then added, and an aliquot was taken for GC analysis as described above. The mixture was passed through a silica plug with benzene as the eluent and concentrated. Column chromatography (Biotage 10g HP-sil, pretreated with Et<sub>3</sub>N, 100% hexanes) afforded 76.6 mg (81%) of **3a** as a colorless oil (rr pre-purification: 27.7, rr post purification: 35.7, br/ln: 62:1 determined by GC analysis).

*From PhOMs:* Following the general procedure **B**, Ligand **1** (34.2 mg, 0.06 mmol, 0.12 equiv), Ni(cod)<sub>2</sub> (13.8 mg, 0.05 mmol, 0.10 equiv), Toluene (500  $\mu$ L), DABCO (280 mg, 2.5 mmol, 5.0 equiv), 1-octene (118  $\mu$ L, 0.75 mmol, 1.5 equiv), and phenyl methanesulfonate (88.0 mg, 0.5 mmol, 1.0 equiv) were added to an 8 mL vial. Toluene (500  $\mu$ L) was used to rinse down the sides of the

vial, and triethylsilyl trifluoromethanesulfonate (226  $\mu\text{L}$ , 1.0 mmol, 2.0 equiv) was added, and the reaction was stirred at 60  $^{\circ}\text{C}$  for 24 h in a nitrogen-filled glovebox. When the reaction was done, it was removed from the glovebox. Dry methanol (400  $\mu\text{L}$ ) was added to quench, and the reaction was stirred for 20 min at room temperature (capped). Benzene (3 mL) was then added, and an aliquot was taken for GC analysis as described above. The mixture was passed through a silica plug with benzene as the eluent and concentrated. Column chromatography (Biotage 10g HP-sil, pretreated with  $\text{Et}_3\text{N}$ , 100% hexanes) afforded 87.6 mg (91%) of **3a** as a colorless oil (rr pre-purification: 30.0, rr post purification: 30.4, br/ln: 59:1 determined by GC analysis).

*From PhOTs:* Following the general procedure **B**, Ligand **1** (34.2 mg, 0.06 mmol, 0.12 equiv),  $\text{Ni}(\text{cod})_2$  (13.8 mg, 0.05 mmol, 0.10 equiv), Toluene (500  $\mu\text{L}$ ), DABCO (280 mg, 2.5 mmol, 5.0 equiv), 1-octene (118  $\mu\text{L}$ , 0.75 mmol, 1.5 equiv), and phenyl *p*-toluenesulfonate (121.3 mg, 0.5 mmol, 1.0 equiv) were added to an 8 mL vial. Toluene (500  $\mu\text{L}$ ) was used to rinse down the sides of the vial, and triethylsilyl trifluoromethanesulfonate (226  $\mu\text{L}$ , 1.0 mmol, 2.0 equiv) was added, and the reaction was stirred at 60  $^{\circ}\text{C}$  for 24 h in a nitrogen-filled glovebox. When the reaction was done, it was removed from the glovebox. Dry methanol (400  $\mu\text{L}$ ) was added to quench, and the reaction was stirred for 20 min at room temperature (capped). Benzene (3 mL) was then added, and an aliquot was taken for GC analysis as described above. The mixture was passed through a silica plug with benzene as the eluent and concentrated. Column chromatography (Biotage 10g HP-sil, pretreated with  $\text{Et}_3\text{N}$ , 100% hexanes) afforded 66.5 mg (72%) of **3a** as a colorless oil (rr pre-purification: 17.4, rr post purification: 19.6, br/ln: 37:1 determined by GC analysis).



From *PhOSO<sub>2</sub>NMe<sub>2</sub>*: Following the general procedure **B**, Ligand **1** (34.2 mg, 0.06 mmol, 0.12 equiv), Ni(cod)<sub>2</sub> (13.8 mg, 0.05 mmol, 0.10 equiv), Toluene (500 μL), DABCO (280 mg, 2.5 mmol, 5.0 equiv), 1-octene (118 μL, 0.75 mmol, 1.5 equiv), and *PhOSO<sub>2</sub>NMe<sub>2</sub>* (82.3 μL, 0.5 mmol, 1.0 equiv) were added to an 8 mL vial. Toluene (500 μL) was used to rinse down the sides of the vial, and triethylsilyl trifluoromethanesulfonate (226 μL, 1.0 mmol, 2.0 equiv) was added, and the reaction was stirred at 60 °C for 24 h in a nitrogen-filled glovebox. When the reaction was done, it was removed from the glovebox. Dry methanol (400 μL) was added to quench, and the reaction was stirred for 20 min at room temperature (capped). Benzene (3 mL) was then added, and an aliquot was taken for GC analysis as described above. The mixture was passed through a silica plug with benzene as the eluent and concentrated. Column chromatography (Biotage 10g HP-sil, pretreated with Et<sub>3</sub>N, 100% hexanes) afforded 57.4 mg (61%) of **3a** as a colorless oil (rr pre-purification: 20.1, rr post purification: 19.6, br/ln: 59:1 determined by GC analysis).

<sup>1</sup>H NMR (500 MHz, CDCl<sub>3</sub>) δ 7.44–7.39 (m, 2H), 7.37–7.30 (m, 2H), 7.29–7.24 (m, 1H), 5.27 (app d, *J* = 1.5 Hz, 1H), 5.06 (app d, *J* = 1.4 Hz, 1H), 2.50 (t, *J* = 7.6, 2H), 1.48–1.42 (m, 2H), 1.36–1.23 (m, 6H), 0.88 (t, *J* = 6.8 Hz, 3H).

<sup>13</sup>C {<sup>1</sup>H} NMR (100 MHz, CDCl<sub>3</sub>) δ 148.8, 141.5, 128.2, 127.2, 126.1, 112.0, 35.4, 31.7, 29.1, 28.3, 22.7, 14.1.

The <sup>1</sup>H and <sup>13</sup>C NMR spectra are in agreement with those reported in the literature.<sup>2</sup>

---

<sup>2</sup> Blatter, K.; Schlüter, A.-D. *Synthesis*, **1989**, 356–359.

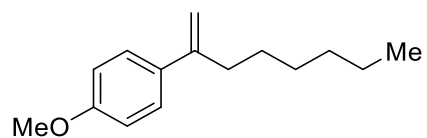

**1-methoxy-4-(oct-1-en-2-yl)benzene (3b):**

*From ArOTf:* Following the general procedure **A**, Ligand **1** (34.2 mg, 0.06 mmol, 0.12 equiv), Ni(cod)<sub>2</sub> (13.8 mg, 0.05 mmol, 0.10 equiv), THF (500 μL, 1 M), DABCO (168 mg, 1.5 mmol, 3.0 equiv), 1-octene (118 μL, 0.75 mmol, 1.5 equiv), and 4-methoxyphenyl trifluoromethanesulfonate (90.5 μL, 0.5 mmol, 1.0 equiv) were added to an 8 mL vial and stirred at 60 °C for 24 h in a nitrogen-filled glovebox. When the reaction was done, it was removed from the glovebox and 3.0 mL benzene was added. An aliquot was taken for GC analysis as described above. The mixture was passed through a silica plug with benzene as the eluent and concentrated. Column chromatography (Biotage 10g HP-sil, 100% hexanes) afforded 104.3 mg (96%) **3b** as a colorless oil (rr pre-purification: 25.2, rr post-purification: 9.3, br/ln 86:1 determined by GC analysis).

*From ArCl:* Following the general procedure **B**, Ligand **1** (34.2 mg, 0.06 mmol, 0.12 equiv), Ni(cod)<sub>2</sub> (13.8 mg, 0.05 mmol, 0.10 equiv), Toluene (500 μL), DABCO (280 mg, 2.5 mmol, 5.0 equiv), 1-octene (118 μL, 0.75 mmol, 1.5 equiv), and 4-methoxy chlorobenzene (61.2 μL, 0.5 mmol, 1.0 equiv) were added to an 8 mL vial. Toluene (500 μL) was used to rinse down the sides of the vial, and triethylsilyl trifluoromethanesulfonate (226 μL, 1.0 mmol, 2.0 equiv) was added, and the reaction was stirred at 60 °C for 48 h in a nitrogen-filled glovebox. When the reaction was done, it was removed from the glovebox. Dry methanol (400 μL) was added to quench, and the reaction was stirred for 20 min at room temperature (capped). Benzene (3 mL) was then added, and an aliquot was taken for GC analysis as described above. The mixture was passed through a

silica plug with benzene as the eluent and concentrated. Column chromatography (Biotage 25g HP-sil, pretreated with Et<sub>3</sub>N, 100% hexanes) afforded 69.6 mg (64%) of **3b** as a colorless oil (rr pre-purification: 26.1, rr post purification: 22.7, br/ln: 84:1 determined by GC analysis).

<sup>1</sup>H NMR (600 MHz, CDCl<sub>3</sub>) δ 7.38–7.35 (m, 2H), 6.89–6.85 (m, 2H), 5.20 (d, *J* = 1.6 Hz, 1H), 4.97 (d, *J* = 1.4 Hz, 1H), 3.82 (s, 3H), 2.47 (td, *J* = 7.6, 1.2 Hz, 2H), 1.49–1.40 (m, 2H), 1.35–1.25 (m, 6H), 0.88 (t, *J* = 6.9 Hz, 3H).

<sup>13</sup>C {<sup>1</sup>H} NMR (100 MHz, CDCl<sub>3</sub>) δ 158.9, 148.0, 133.9, 127.1, 113.6, 110.4, 55.2, 35.4, 31.7, 29.0, 28.3, 22.6, 14.1

The <sup>1</sup>H and <sup>13</sup>C NMR spectra are in agreement with those reported in the literature.<sup>3</sup>

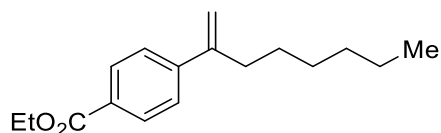

#### **Ethyl 4-(oct-1-en-2-yl)benzoate (3c):**

*From ArOTf:* Following the general procedure **A**, Ligand **1** (34.2 mg, 0.06 mmol, 0.12 equiv), Ni(cod)<sub>2</sub> (13.8 mg, 0.05 mmol, 0.10 equiv), THF (500 μL, 1 M), DABCO (168 mg, 1.5 mmol, 3.0

<sup>3</sup> Shirakawa, F.; Imazaki, Y.; Hayashi, T. *Chem. Lett.* **2008**, *37*, 654–655.

equiv), 1-octene (118  $\mu\text{L}$ , 0.75 mmol, 1.5 equiv), and 4-CO<sub>2</sub>Et phenyl trifluoromethanesulfonate (108.1  $\mu\text{L}$ , 0.5 mmol, 1.0 equiv) were added to an 8 mL vial and stirred at 60 °C for 48 h in a nitrogen-filled glovebox. When the reaction was done, it was removed from the glovebox and 3.0 mL benzene was added. An aliquot was taken for GC analysis as described above. The mixture was passed through a silica plug with benzene as the eluent and concentrated. Column chromatography (Biotage 10g HP-sil pretreated with Et<sub>3</sub>N, 0–4% ethyl acetate/hexanes) afforded 95.1 mg (73%) **3c** as a colorless oil (rr pre-purification: 46.8, rr post-purification: 38.8, br/ln 83:1 determined by GC analysis).

*From ArOMs:* Following the general procedure **B**, Ligand **1** (34.2 mg, 0.06 mmol, 0.12 equiv), Ni(cod)<sub>2</sub> (13.8 mg, 0.05 mmol, 0.10 equiv), Toluene (500  $\mu\text{L}$ ), DABCO (280 mg, 2.5 mmol, 5.0 equiv), 1-octene (118  $\mu\text{L}$ , 0.75 mmol, 1.5 equiv), and 4-CO<sub>2</sub>Et phenyl methanesulfonate (123.1 mg, 0.5 mmol, 1.0 equiv) were added to an 8 mL vial. Toluene (500  $\mu\text{L}$ ) was used to rinse down the sides of the vial, and triisopropylsilyl trifluoromethanesulfonate (269  $\mu\text{L}$ , 1.0 mmol, 2.0 equiv) was added, and the reaction was stirred at 60 °C for 72 h in a nitrogen-filled glovebox. When the reaction was done, it was removed from the glovebox. Dry methanol (400  $\mu\text{L}$ ) was added to quench, and the reaction was stirred for 20 min at room temperature (capped). Benzene (3 mL) was then added, and an aliquot was taken for GC analysis as described above. The mixture was passed through a silica plug with benzene as the eluent and concentrated. Column chromatography (Biotage 25g HP-sil, pretreated with Et<sub>3</sub>N, 0–4% ethyl acetate/hexanes) afforded 80.6 mg of a 7.4:1 inseparable mixture of the desired product/4-CO<sub>2</sub>EtPhOTIPS (54% adjusted yield) of **3c** as a colorless oil (rr pre-purification: 57.1, rr post purification: 57.1, br/ln: 107:1 determined by GC analysis).

$^1\text{H}$  NMR (600 MHz,  $\text{CDCl}_3$ )  $\delta$  8.04–7.97 (m, 2H), 7.49–7.43 (m, 2H), 5.35 (d,  $J = 1.3$  Hz, 1H), 5.15 (q,  $J = 1.4$  Hz, 1H), 4.38 (q,  $J = 7.2$  Hz, 2H), 2.51 (td,  $J = 7.6, 1.2$  Hz, 2H), 1.46–1.41 (m, 2H), 1.40 (t,  $J = 7.1$  Hz, 3H), 1.34–1.25 (m, 6H), 0.87 (t,  $J = 6.9$  Hz, 3H).

$^{13}\text{C}$   $\{^1\text{H}\}$  NMR (100 MHz,  $\text{CDCl}_3$ )  $\delta$  166.5, 148.0, 146.0, 129.5, 129.2, 126.0, 113.8, 60.8, 35.2, 31.6, 28.9, 28.1, 22.6, 14.3, 14.0.

The  $^1\text{H}$  and  $^{13}\text{C}$  NMR spectra are in agreement with those reported in the literature.<sup>4</sup>

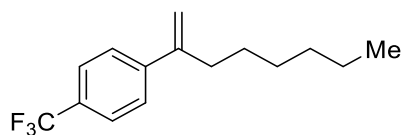

**1-(Oct-1-en-2-yl)-4-(trifluoromethyl)benzene (3d):**

*From ArOTf:* Following the general procedure **A**, Ligand **1** (51.3 mg, 0.09 mmol, 0.18 equiv),  $\text{Ni}(\text{cod})_2$  (20.6 mg, 0.075 mmol, 0.15 equiv), THF (500  $\mu\text{L}$ , 1 M), DABCO (168 mg, 1.5 mmol, 3.0 equiv), 1-octene (236  $\mu\text{L}$ , 1.5 mmol, 3.0 equiv), and 4-trifluoromethylphenyl trifluoromethanesulfonate (96.0  $\mu\text{L}$ , 0.5 mmol, 1.0 equiv) were added to an 8 mL vial and stirred at 60  $^\circ\text{C}$  for 48 h in a nitrogen-filled glovebox. When the reaction was done, it was removed from the glovebox and 3.0 mL benzene was added. An aliquot was taken for GC analysis as described

<sup>4</sup> Qin, L.; Ren, X.; Lu, Y.; Li, Y.; Zhou, J. *Angew. Chem., Int. Ed.* **2012**, *51*, 5915–5919.

above. The mixture was passed through a silica plug with benzene as the eluent and concentrated. Column chromatography (Biotage 10g HP-sil pretreated with Et<sub>3</sub>N, 100% hexanes) afforded 91.0 mg (71%) **3d** as a colorless oil (rr pre-purification: 22.6, rr post-purification: 31.3, br/ln 115:1 determined by GC analysis).

*From ArCl:* Following the general procedure **B**, Ligand **1** (34.2 mg, 0.06 mmol, 0.12 equiv), Ni(cod)<sub>2</sub> (13.8 mg, 0.05 mmol, 0.10 equiv), Toluene (500 μL), DABCO (280 mg, 2.5 mmol, 5.0 equiv), 1-octene (236 μL, 1.5 mmol, 3.0 equiv), and 4-trifluoromethyl chlorobenzene (66.7 μL, 0.5 mmol, 1.0 equiv) were added to an 8 mL vial. Toluene (500 μL) was used to rinse down the sides of the vial, and triisopropylsilyl trifluoromethanesulfonate (269 μL, 1.0 mmol, 2.0 equiv) was added, and the reaction was stirred at 60 °C for 48 h in a nitrogen-filled glovebox. When the reaction was done, it was removed from the glovebox. Dry methanol (400 μL) was added to quench, and the reaction was stirred for 20 min at room temperature (capped). Benzene (3 mL) was then added, and an aliquot was taken for GC analysis as described above. The mixture was passed through a silica plug with benzene as the eluent and concentrated. Column chromatography (Biotage 10g HP-sil, pretreated with Et<sub>3</sub>N, 100% hexanes) afforded 85.5g (57%) of **3d** as a colorless oil (rr pre-purification: 19.0, rr post purification: 20.7, br/ln: 164:1 determined by GC analysis). Note: The yield was adjusted to take into account a small amount of TIPSOMe (the result of the methanol quench) remaining inseparable from the product. Although the use of TIPSOTf allows for longer reaction times, the formation of non-volatile TIPSOMe rather than the volatile TESOMe after quenching with MeOH can make purification difficult in the case of very non-polar products.

$^1\text{H}$  NMR (600 MHz,  $\text{CDCl}_3$ )  $\delta$  7.58 (d,  $J = 8.2$  Hz, 2H), 7.50 (d,  $J = 7.9$  Hz, 2H), 5.32 (app s, 1H), 5.16 (d,  $J = 1.4$  Hz, 1H), 2.51 (td,  $J = 7.5, 1.2$  Hz, 2H), 1.46–1.41 (m, 2H), 1.35–1.21 (m, 6H), 0.88 (t,  $J = 6.9$  Hz, 3H).

$^{13}\text{C}$   $\{^1\text{H}\}$  NMR (100 MHz,  $\text{CDCl}_3$ )  $\delta$  147.7, 145.1 (q,  $J = 1.3$  Hz), 129.2 (q,  $J = 32.4$  Hz), 126.4, 125.2 (q,  $J = 3.8$  Hz), 124.3 (q,  $J = 271.8$  Hz), 113.9, 35.2, 31.6, 28.9, 28.1, 22.6, 14.0.

The  $^1\text{H}$  and  $^{13}\text{C}$  NMR spectra are in agreement with those reported in the literature.<sup>3</sup>

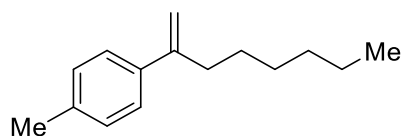

### 1-Methyl-4-(oct-1-en-2-yl)benzene (3e):

*From ArOTf:* Following the general procedure A, Ligand **1** (34.2 mg, 0.06 mmol, 0.12 equiv),  $\text{Ni}(\text{cod})_2$  (13.8 mg, 0.05 mmol, 0.10 equiv), THF (500  $\mu\text{L}$ , 2 M), DABCO (168 mg, 1.5 mmol, 3.0 equiv), 1-octene (118  $\mu\text{L}$ , 0.75 mmol, 1.5 equiv), and 4-methylphenyl trifluoromethanesulfonate (89.5  $\mu\text{L}$ , 0.5 mmol, 1.0 equiv) were added to an 8 mL vial and stirred at 60  $^\circ\text{C}$  for 24 h in a nitrogen-filled glovebox. When the reaction was done, it was removed from the glovebox and 3.0 mL benzene was added. An aliquot was taken for GC analysis as described above. The mixture was passed through a silica plug with benzene as the eluent and concentrated. Column chromatography (Biotage 10g HP-sil pretreated with  $\text{Et}_3\text{N}$ , 100% hexanes) afforded 71.6 mg (71%)

**3e** as a colorless oil (rr pre-purification: 20.3, rr post-purification: 22.0, br/ln 60:1 determined by GC analysis).

$^1\text{H}$  NMR (600 MHz,  $\text{CDCl}_3$ )  $\delta$  7.32 (d,  $J = 8.2$  Hz, 2H), 7.14 (d,  $J = 8.3$  Hz, 2H), 5.24 (d,  $J = 1.6$  Hz, 1H), 5.01 (d,  $J = 1.5$  Hz, 1H), 2.48 (td,  $J = 7.6, 1.3$  Hz, 2H), 2.36 (s, 3H), 1.44 (quin,  $J = 7.4$  Hz, 2H), 1.35–1.25 (m, 6H), 0.88 (t,  $J = 6.9$  Hz, 3H).

$^{13}\text{C}$   $\{^1\text{H}\}$  NMR (100 MHz,  $\text{CDCl}_3$ )  $\delta$  148.6, 138.5, 136.9, 128.9, 126.0, 111.2, 35.4, 31.7, 29.1, 28.3, 22.6, 21.1, 14.1.

IR (ATR,  $\text{cm}^{-1}$ ) 3082, 3025, 2926, 2857, 1625, 1566, 1513, 1457, 1377, 1299, 1186, 1120, 1040, 1019, 890, 823, 733.

HRMS ( $m/z$ )  $[\text{M} + \text{H}]^+$  calcd for  $\text{C}_{15}\text{H}_{22}$ , 203.1794; found, 203.1787.

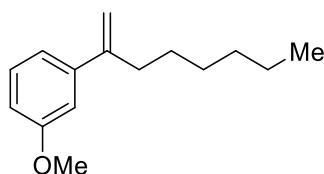

**1-Methoxy-3-(oct-1-en-2-yl)benzene (3f):**

*From ArOTf:* Following the general procedure **A**, Ligand **1** (34.2 mg, 0.06 mmol, 0.12 equiv),  $\text{Ni}(\text{cod})_2$  (13.8 mg, 0.05 mmol, 0.10 equiv), THF (500  $\mu\text{L}$ , 1 M), DABCO (280 mg, 2.5 mmol, 5.0 equiv), 1-octene (199  $\mu\text{L}$ , 1.27 mmol, 2.5 equiv), and 3-methoxy trifluoromethanesulfonate (89.5



$\mu\text{L}$ , 0.5 mmol, 1.0 equiv) were added to an 8 mL vial and stirred at 60 °C for 24 h in a nitrogen-filled glovebox. When the reaction was done, it was removed from the glovebox and 3.0 mL benzene was added. An aliquot was taken for GC analysis as described above. The mixture was passed through a silica plug with benzene as the eluent and concentrated. Column chromatography (Biotage 25g HP-sil pretreated with  $\text{Et}_3\text{N}$ , 0–1% ethyl acetate/hexanes) afforded 91.2 mg (84%) **3f** as a colorless oil (rr pre-purification: 35.3, rr post-purification: 24.6, br/ln 75:1 determined by GC analysis).

*From ArOMs:* Following the general procedure **B**, Ligand **1** (34.2 mg, 0.06 mmol, 0.12 equiv),  $\text{Ni}(\text{cod})_2$  (13.8 mg, 0.05 mmol, 0.10 equiv), Toluene (500  $\mu\text{L}$ ), DABCO (280 mg, 2.5 mmol, 5.0 equiv), 1-octene (118  $\mu\text{L}$ , 0.75 mmol, 1.5 equiv), and 3-methoxyphenyl methanesulfonate (77.9  $\mu\text{L}$ , 0.5 mmol, 1.0 equiv) were added to an 8 mL vial. Toluene (500  $\mu\text{L}$ ) was used to rinse down the sides of the vial, and triethylsilyl trifluoromethanesulfonate (226  $\mu\text{L}$ , 1.0 mmol, 2.0 equiv) was added, and the reaction was stirred at 60 °C for 48 h in a nitrogen-filled glovebox. When the reaction was done, it was removed from the glovebox. Dry methanol (400  $\mu\text{L}$ ) was added to quench, and the reaction was stirred for 20 min at room temperature (capped). Benzene (3 mL) was then added, and an aliquot was taken for GC analysis as described above. The mixture was passed through a silica plug with benzene as the eluent and concentrated. Column chromatography (Biotage 25g HP-sil pretreated with  $\text{Et}_3\text{N}$ , 0–2% ethyl acetate/hexanes) afforded 64.9 mg (59%) **3f** as a colorless oil (rr pre-purification: 37.1, rr post-purification: 34.1, br/ln 112:1 determined by GC analysis).

$^1\text{H}$  NMR (600 MHz,  $\text{CDCl}_3$ )  $\delta$  7.25 (t,  $J = 8.0$  Hz, 1H), 7.01 (dt,  $J = 7.7, 1.2$  Hz, 1H), 6.95 (dd,  $J = 2.6, 1.7$  Hz, 1H), 6.83 (ddd,  $J = 8.2, 2.6, 0.9$  Hz, 1H), 5.27 (d,  $J = 1.5$  Hz, 1H), 5.06 (d,  $J = 1.5$  Hz, 1H), 3.84 (s, 3H), 2.48 (td,  $J = 7.6, 1.2$  Hz, 2H), 1.45 (quin,  $J = 7.3$  Hz, 2H), 1.35–1.25 (m, 6H), 0.88 (t,  $J = 6.9$  Hz, 3H).

$^{13}\text{C}$   $\{^1\text{H}\}$  NMR (100 MHz,  $\text{CDCl}_3$ )  $\delta$  159.5, 148.7, 143.1, 129.1, 118.7, 112.4, 112.14, 112.10, 55.2, 35.4, 31.7, 29.0, 28.2, 22.6, 14.1.

The  $^1\text{H}$  and  $^{13}\text{C}$  NMR spectra are in agreement with those reported in the literature.<sup>3</sup>

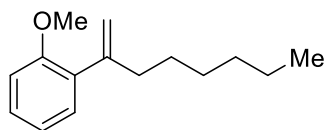

### 1-Methoxy-2-(oct-1-en-2-yl)benzene (3g):

*From ArOTf:* Following the general procedure **A**, Ligand **1** (34.2 mg, 0.06 mmol, 0.12 equiv),  $\text{Ni}(\text{cod})_2$  (13.8 mg, 0.05 mmol, 0.10 equiv), THF (500  $\mu\text{L}$ , 1 M), DABCO (168 mg, 1.5 mmol, 3.0 equiv), 1-octene (118  $\mu\text{L}$ , 0.75 mmol, 1.5 equiv), and 2-methoxyphenyl trifluoromethanesulfonate (91.5  $\mu\text{L}$ , 0.5 mmol, 1.0 equiv) were added to an 8 mL vial and stirred at 60  $^\circ\text{C}$  for 24 h in a nitrogen-filled glovebox. When the reaction was done, it was removed from the glovebox and 3.0 mL benzene was added. An aliquot was taken for GC analysis as described above. The mixture was passed through a silica plug with benzene as the eluent and concentrated. Column chromatography (Biotage 10g HP-sil, 100% [2%  $\text{Et}_3\text{N}$  in hexanes] to 5% ethyl acetate/95% [2%

Et<sub>3</sub>N in hexanes] ) afforded 62.7 mg (57%) **3g** as a colorless oil (rr pre-purification: 17.9, rr post-purification: 19.0, br/ln 38:1 determined by GC analysis).

<sup>1</sup>H NMR (600 MHz, CDCl<sub>3</sub>) δ 7.27–7.23 (m, 1H), 7.13 (dd, *J* = 7.4, 1.8 Hz, 1H), 6.92 (td, *J* = 7.4, 1.1 Hz, 1H), 6.88 (dd, *J* = 8.3, 1.0 Hz, 1H), 5.13 (dt, *J* = 2.4, 1.4 Hz, 1H), 5.00 (d, *J* = 2.1 Hz, 1H), 3.83 (s, 3H), 2.47 (t, *J* = 7.6 Hz, 2H), 1.37–1.21 (m, 8H), 0.86 (t, *J* = 7.0 Hz, 3H).

<sup>13</sup>C {<sup>1</sup>H} NMR (100 MHz, CDCl<sub>3</sub>) δ 156.5, 149.4, 132.4, 130.1, 128.2, 120.4, 113.8, 110.6, 55.4, 36.4, 31.7, 29.0, 28.1, 22.6, 14.1.

The <sup>1</sup>H and <sup>13</sup>C NMR spectra are in agreement with those reported in the literature.<sup>3</sup>

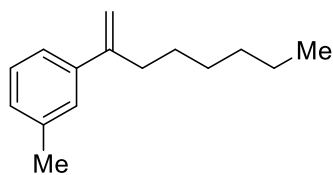

**1-Methyl-3-(oct-1-en-2-yl)benzene (3h):**

*From ArOTf:* Following the general procedure **A**, Ligand **1** (34.2 mg, 0.06 mmol, 0.12 equiv), Ni(cod)<sub>2</sub> (13.8 mg, 0.05 mmol, 0.10 equiv), THF (500 μL, 1 M), DABCO (168 mg, 1.5 mmol, 3.0 equiv), 1-octene (118 μL, 0.75 mmol, 1.5 equiv), and 3-methylphenyl trifluoromethanesulfonate (90.5 μL, 0.5 mmol, 1.0 equiv) were added to an 8 mL vial and stirred at 60 °C for 24 h in a nitrogen-filled glovebox. When the reaction was done, it was removed from the glovebox and 3.0

mL benzene was added. An aliquot was taken for GC analysis as described above. The mixture was passed through a silica plug with benzene as the eluent and concentrated. Column chromatography (Biotage 25g HP-sil, pretreated with Et<sub>3</sub>N, 100%) afforded 73.7 mg (73%) **3h** as a colorless oil (rr pre-purification: 25.5, rr post-purification: 20.0, br/l<sub>n</sub> 63:1 determined by GC analysis).

<sup>1</sup>H NMR (600 MHz, CDCl<sub>3</sub>) δ 7.25–7.20 (m, 3H), 7.10–7.08 (m, 1H), 5.25 (d, *J* = 1.6 Hz, 1H), 5.04 (d, *J* = 1.5 Hz, 1H), 2.49 (td, *J* = 7.6, 1.2 Hz, 2H), 2.37 (s, 3H), 1.45 (quin, *J* = 7.3 Hz, 2H), 1.36–1.26 (m, 6H), 0.88 (t, *J* = 6.9 Hz, 3H).

<sup>13</sup>C {<sup>1</sup>H} NMR (100 MHz, CDCl<sub>3</sub>) δ 148.9, 141.5, 137.7, 128.1, 128.0, 126.9, 123.2, 111.8, 35.4, 31.7, 29.0, 28.3, 22.6, 21.5, 14.1.

IR (ATR, cm<sup>-1</sup>) 3028, 2927, 2858, 2360, 2338, 1602, 1582, 1488, 1459, 1426, 1216, 1144, 892, 790, 722.

HRMS (*m/z*) [M + H]<sup>+</sup> calcd for C<sub>15</sub>H<sub>22</sub>, 203.1794; found, 203.1794.

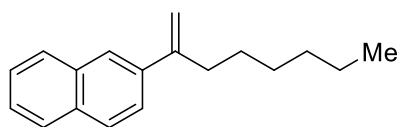

**2-(Oct-1-en-2-yl)naphthalene (3i):**

*From ArOTf:* Following the general procedure **A**, Ligand **1** (34.2 mg, 0.06 mmol, 0.12 equiv), Ni(cod)<sub>2</sub> (13.8 mg, 0.05 mmol, 0.10 equiv), THF (500 μL, 1 M), DABCO (168 mg, 1.5 mmol, 3.0 equiv), 1-octene (118 μL, 0.75 mmol, 1.5 equiv), and 2-naphthyl trifluoromethanesulfonate (136.4 mg, 0.5 mmol, 1.0 equiv) were added to an 8 mL vial and stirred at 60 °C for 24 h in a nitrogen-filled glovebox. When the reaction was done, it was removed from the glovebox and 3.0 mL benzene was added. An aliquot was taken for GC analysis as described above. Complete conversion was obtained, so simple filtration through a silica plug with benzene as the eluent afforded 114.0 mg (97%) **3i** as a colorless oil (rr pre-purification: 17.2, rr post-purification: 24.2, br/l<sub>n</sub> 57:1 determined by GC analysis).

*From ArOTs:* Following the general procedure **B**, Ligand **1** (34.2 mg, 0.06 mmol, 0.12 equiv), Ni(cod)<sub>2</sub> (13.8 mg, 0.05 mmol, 0.10 equiv), Toluene (500 μL), DABCO (280 mg, 2.5 mmol, 5.0 equiv), 1-octene (118 μL, 0.75 mmol, 1.5 equiv), and 2-naphthyl *p*-toluenesulfonate (150.8 mg, 0.5 mmol, 1.0 equiv) were added to an 8 mL vial. Toluene (500 μL) was used to rinse down the sides of the vial, and triethylsilyl trifluoromethanesulfonate (226 μL, 1.0 mmol, 2.0 equiv) was added, and the reaction was stirred at 60 °C for 24 h in a nitrogen-filled glovebox. When the reaction was done, it was removed from the glovebox. Dry methanol (400 μL) was added to quench, and the reaction was stirred for 20 min at room temperature (capped). Benzene (3 mL) was then added, and an aliquot was taken for GC analysis as described above. The mixture was

passed through a silica plug with benzene as the eluent and concentrated. Column chromatography (Biotage 10g HP-sil, pretreated with Et<sub>3</sub>N, 100% hexanes) afforded 108.8 mg (72%) of **3i** as a colorless oil (rr pre-purification: 26.1, rr post purification: 23.7, br/ln: 45:1 determined by GC analysis).

<sup>1</sup>H NMR (400 MHz, CDCl<sub>3</sub>) δ 7.87 – 7.81 (m, 4H), 7.61 (dd, *J* = 8.6, 1.8 Hz, 1H), 7.51–7.44 (m, 2H), 5.43 (d, *J* = 1.5 Hz, 1H), 5.18 (d, *J* = 1.4 Hz, 1H), 2.64 (td, *J* = 7.5, 1.2 Hz, 2H), 1.53 (quin, *J* = 7.1 Hz, 2H), 1.42–1.28 (m, 6H), 0.90 (t, *J* = 6.8 Hz, 3H).

<sup>13</sup>C {<sup>1</sup>H} NMR (100 MHz, CDCl<sub>3</sub>) δ 148.6, 138.7, 133.4, 132.7, 128.1, 127.7, 127.5, 126.0, 125.7, 124.7, 124.6, 112.6, 35.4, 31.7, 29.1, 28.3, 22.6, 14.1.

The <sup>1</sup>H and <sup>13</sup>C NMR spectra are in agreement with those reported in the literature.<sup>2,4</sup>

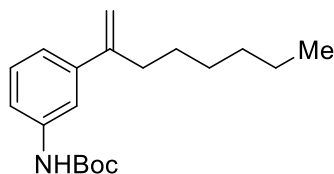

**Tert-butyl (3-(oct-1-en-2-yl)phenyl)carbamate (3j):**

*From ArOTf:* Following the general procedure **A**, Ligand **1** (34.2 mg, 0.06 mmol, 0.12 equiv), Ni(cod)<sub>2</sub> (13.8 mg, 0.05 mmol, 0.10 equiv), THF (500 μL, 1 M), DABCO (168 mg, 1.5 mmol, 3.0 equiv), 1-octene (118 μL, 0.75 mmol, 1.5 equiv), and 3-NHBoc-trifluoromethanesulfonate (171.1 mg, 0.50 mmol, 1.0 equiv) were added to an 8 mL vial and stirred at 60 °C for 24 h in a nitrogen-filled glovebox. When the reaction was done, it was removed from the glovebox and 3.0 mL

benzene was added. An aliquot was taken for GC analysis as described above. Complete conversion was obtained, so simple filtration through a silica plug with benzene as the eluent and concentrated. Column chromatography (Biotage 10g HP-sil, 4–16% ethyl acetate/hexanes) afforded 77.0 mg (83%) of **3q** as a colorless oil (rr pre-purification: 9.0, rr post purification: 32.5, br/lr: 58:1 determined by GC analysis).

$^1\text{H}$  NMR (400 MHz,  $\text{CDCl}_3$ )  $\delta$  7.38–7.36 (m, 1H), 7.34–7.29 (m, 1H), 7.25 (t,  $J = 7.8$  Hz, 1H), 7.08 (dt,  $J = 7.6, 1.4$  Hz, 1H), 6.54 (s, 1H), 5.25 (d,  $J = 1.5$  Hz, 1H), 5.05 (dd,  $J = 1.4, 1.4$  Hz, 1H), 2.47 (td,  $J = 7.5, 1.2$  Hz, 2H), 1.54 (s, 9H), 1.49–1.39 (m, 2H), 1.37–1.22 (m, 6H), 0.88 (t,  $J = 6.8$  Hz, 3H).

$^{13}\text{C}$  { $^1\text{H}$ } NMR (100 MHz,  $\text{CDCl}_3$ )  $\delta$  152.7, 148.5, 142.5, 138.3, 128.8, 120.9, 117.4, 116.4, 112.3, 80.4, 35.3, 31.6, 29.0, 28.3, 28.2, 22.6, 14.1.

IR (ATR,  $\text{cm}^{-1}$ ) 2929, 2858, 1700, 1606, 1585, 1526, 1489, 1432, 1392, 1367, 1310, 1280, 1233, 1155, 1054, 907, 891, 791, 729.

HRMS ( $m/z$ ) [ $\text{M} + \text{Na}$ ] $^+$  calcd for  $\text{C}_{19}\text{H}_{29}\text{NO}_2$ , 326.2091; found, 326.2103.

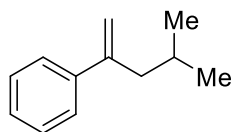

**(4-Methylpent-1-en-2-yl)benzene (3q):**

*From PhOTf:* Following the general procedure **A**, Ligand **1** (34.2 mg, 0.06 mmol, 0.12 equiv), Ni(cod)<sub>2</sub> (13.8 mg, 0.05 mmol, 0.10 equiv), THF (500 μL, 1 M), DABCO (168 mg, 1.5 mmol, 3.0 equiv), 4-methyl-1-pentene (94.9 μL, 0.75 mmol, 1.5 equiv), and phenyl trifluoromethanesulfonate (81 μL, 0.5 mmol, 1.0 equiv) were added to an 8 mL vial and stirred at 60 °C for 24 h in a nitrogen-filled glovebox. When the reaction was done, it was removed from the glovebox and 3.0 mL benzene was added. An aliquot was taken for GC analysis as described above. Complete conversion was obtained, so simple filtration through a silica plug with benzene as the eluent afforded 79.8 mg (99%) **3q** as a colorless oil (rr pre-purification: 31.8, rr post-purification: 29.9, br/ln 51:1 determined by GC analysis).

<sup>1</sup>H NMR (600 MHz, CDCl<sub>3</sub>) δ 7.40 (m, 2H), 7.33 (app dd, *J* = 8.4, 6.8 Hz, 2H), 7.29–7.25 (m, 1H), 5.27 (d, *J* = 1.8 Hz, 1H), 5.04 (d, *J* = 1.5 Hz, 1H), 2.40 (dd, *J* = 7.3, 1.1 Hz, 2H), 1.67 (app septet, *J* = 6.8 Hz, 1H), 0.88 (d, *J* = 6.6 Hz, 6H).

<sup>13</sup>C {<sup>1</sup>H} NMR (100 MHz, CDCl<sub>3</sub>) δ 147.8, 141.5, 128.2, 127.2, 126.3, 113.4, 45.1, 26.4, 22.4.

The <sup>1</sup>H and <sup>13</sup>C NMR spectra are in agreement with those reported in the literature.<sup>5</sup>

<sup>6</sup> Limmert, M. E.; Roy, A. H.; Hartwig, J. F. *J. Org. Chem.* **2005**, *70*, 9364–9370.



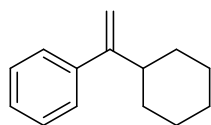

**(1-Cyclohexylvinyl)benzene (3r):**

*From PhOTf:* Following the general procedure **A**, Ligand **1** (34.2 mg, 0.06 mmol, 0.12 equiv), Ni(cod)<sub>2</sub> (13.8 mg, 0.05 mmol, 0.10 equiv), THF (500 μL, 1 M), DABCO (168 mg, 1.5 mmol, 3.0 equiv), vinylcyclohexane (103 μL, 0.75 mmol, 1.5 equiv), and phenyl trifluoromethanesulfonate (81 μL, 0.5 mmol, 1.0 equiv) were added to an 8 mL vial and stirred at 60 °C for 48 h in a nitrogen-filled glovebox. When the reaction was done, it was removed from the glovebox and 3.0 mL benzene was added. An aliquot was taken for GC analysis as described above. The mixture was passed through a silica plug with benzene as the eluent and concentrated. Column chromatography (Biotage 10g HP-sil, 100% hexanes) afforded 77.0 mg (83%) of **3r** as a colorless oil (rr pre-purification: 46.1, rr post purification: 57.9, br/ln: 81:1 determined by GC analysis).

*From PhOMs:* Following the general procedure **B**, Ligand **1** (34.2 mg, 0.06 mmol, 0.12 equiv), Ni(cod)<sub>2</sub> (13.8 mg, 0.05 mmol, 0.10 equiv), Toluene (500 μL), DABCO (280 mg, 2.5 mmol, 5.0 equiv), vinylcyclohexane (103 μL, 0.75 mmol, 1.5 equiv), and phenyl methanesulfonate (86.4 mg, 0.5 mmol, 1.0 equiv) were added to an 8 mL vial. Toluene (500 μL) was used to rinse down the sides of the vial, and triethylsilyl trifluoromethanesulfonate (226 μL, 1.0 mmol, 2.0 equiv) was added, and the reaction was stirred at 60 °C for 48 h in a nitrogen-filled glovebox. When the reaction was done, it was removed from the glovebox. Dry methanol (400 μL) was added to quench, and the reaction was stirred for 20 min at room temperature (capped). Benzene (3 mL) was then added, and an aliquot was taken for GC analysis as described above. The mixture was

passed through a silica plug with benzene as the eluent and concentrated. Column chromatography (Biotage 10g HP-sil, pretreated with Et<sub>3</sub>N, 100% hexanes) afforded 52.9 mg (57%) of **3r** as a colorless oil (rr pre-purification: 28.4, rr post purification: 33.9, br/ln: 55:1 determined by GC analysis).

*From PhOTs:* Following the general procedure **B**, Ligand **1** (34.2 mg, 0.06 mmol, 0.12 equiv), Ni(cod)<sub>2</sub> (13.8 mg, 0.05 mmol, 0.10 equiv), Toluene (500 μL), DABCO (280 mg, 2.5 mmol, 5.0 equiv), vinylcyclohexane (103 μL, 0.75 mmol, 1.5 equiv), and phenyl *p*-toluenesulfonate (123.5 mg, 0.5 mmol, 1.0 equiv) were added to an 8 mL vial. Toluene (500 μL) was used to rinse down the sides of the vial, and triethylsilyl trifluoromethanesulfonate (226 μL, 1.0 mmol, 2.0 equiv) was added, and the reaction was stirred at 60 °C for 24 h in a nitrogen-filled glovebox. When the reaction was done, it was removed from the glovebox. Dry methanol (400 μL) was added to quench, and the reaction was stirred for 20 min at room temperature (capped). Benzene (3 mL) was then added, and an aliquot was taken for GC analysis as described above. The mixture was passed through a silica plug with benzene as the eluent and concentrated. Column chromatography (Biotage 10g HP-sil, pretreated with Et<sub>3</sub>N, 100% hexanes) afforded 49.0 mg (53%) of **3r** as a colorless oil (rr pre-purification: 37.8, rr post purification: 33.9, br/ln: 92:1 determined by GC analysis).

<sup>1</sup>H NMR (400 MHz, CDCl<sub>3</sub>) δ 7.38–7.32 (m, 4H), 7.30–7.26 (m, 1H), 5.16 (d, *J* = 1.4 Hz, 1H), 5.03 (app t, *J* = 1.3 Hz, 1H), 2.45 (t, *J* = 11.5 Hz, 1H), 1.92–1.78 (m, 4H), 1.77–1.72 (m, 1H), 1.41–1.14 (m, 5H).

$^{13}\text{C}$   $\{^1\text{H}\}$  NMR (100 MHz,  $\text{CDCl}_3$ )  $\delta$  155.0, 143.0, 128.1, 127.0, 126.6, 110.3, 42.6, 32.7, 26.8, 26.4.

The  $^1\text{H}$  and  $^{13}\text{C}$  NMR spectra are in agreement with those reported in the literature.<sup>6</sup>

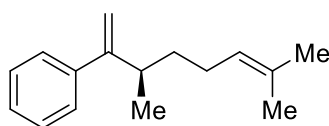

**(R)-(3,7-Dimethylocta-1,6-dien-2-yl)benzene (3s):**

*From PhOTf:* Following the general procedure A, Ligand **1** (34.2 mg, 0.06 mmol, 0.12 equiv),  $\text{Ni}(\text{cod})_2$  (13.8 mg, 0.05 mmol, 0.10 equiv), THF (500  $\mu\text{L}$ , 1 M), DABCO (168 mg, 1.5 mmol, 3.0 equiv), (-)- $\beta$ -citronellene (136  $\mu\text{L}$ , 0.75 mmol, 1.5 equiv), and phenyl trifluoromethanesulfonate (81  $\mu\text{L}$ , 0.5 mmol, 1.0 equiv) were added to an 8 mL vial and stirred at 60  $^\circ\text{C}$  for 48 h in a nitrogen-filled glovebox. When the reaction was done, it was removed from the glovebox and 3.0 mL benzene was added. An aliquot was taken for GC analysis as described above. The mixture was passed through a silica plug with benzene as the eluent and concentrated. Column chromatography (Biotage 10g HP-sil, 100% hexanes) afforded 64.0 mg (60%) of **3s** as a colorless oil (rr pre-purification: 51.2, rr post purification: 57.8, br/ln: 107:1 determined by GC analysis).

<sup>6</sup> Hansen, A. L.; Ebran, J.-P.; Gøgsig, T. M.; Skrydstrup, T. *J. Org. Chem.* **2007**, 72, 6464–6472.

*From PhCl:* Following the general procedure **B**, Ligand **1** (34.2 mg, 0.06 mmol, 0.12 equiv), Ni(cod)<sub>2</sub> (13.8 mg, 0.05 mmol, 0.10 equiv), Toluene (500 μL), DABCO (280 mg, 2.5 mmol, 5.0 equiv), (-)-β-citronellene (136 μL, 0.75 mmol, 1.5 equiv), and chlorobenzene (50.9 μL, 0.5 mmol, 1.0 equiv) were added to an 8 mL vial. Toluene (500 μL) was used to rinse down the sides of the vial, and triethylsilyl trifluoromethanesulfonate (226 μL, 1.0 mmol, 2.0 equiv) was added, and the reaction was stirred at 60 °C for 48 h in a nitrogen-filled glovebox. When the reaction was done, it was removed from the glovebox. Dry methanol (400 μL) was added to quench, and the reaction was stirred for 20 min at room temperature (capped). Benzene (3 mL) was then added, and an aliquot was taken for GC analysis as described above. The mixture was passed through a silica plug with benzene as the eluent and concentrated. Column chromatography (Biotage 10g HP-sil, pretreated with Et<sub>3</sub>N, 100% hexanes) afforded 49.5 mg (49%) of **3s** as a colorless oil (rr pre-purification: 32.5, rr post purification: 43.0, br/ln: 109:1 determined by GC analysis).

<sup>1</sup>H NMR (600 MHz, CDCl<sub>3</sub>) δ 7.36–7.31 (m, 4H), 7.29–7.25 (m, 1H), 5.20 (d, *J* = 1.2 Hz, 1H), 5.09 (ddt, *J* = 8.6, 5.7, 1.5 Hz, 1H), 5.05 (t, *J* = 1.3 Hz, 1H), 2.70 (sextet, *J* = 6.9 Hz, 1H), 2.01 (br s, 2H), 1.68 (d, *J* = 1.3 Hz, 3H), 1.57 (s, 3H) 1.59–1.54 (m, 1H), 1.40–1.29 (m, 1H), 1.14 (d, *J* = 6.8 Hz, 3H).

<sup>13</sup>C {<sup>1</sup>H} NMR (100 MHz, CDCl<sub>3</sub>) δ 154.7, 143.0, 131.4, 128.1, 127.0, 126.7, 124.6, 111.0, 37.5, 36.1, 25.8, 25.7, 20.1, 17.6.

IR (ATR, cm<sup>-1</sup>) 2964, 2923, 2856, 1625, 1574, 1492, 1451, 1375, 895, 776, 698.

HRMS ( $m/z$ )  $[M + H]^+$  calcd for  $C_{16}H_{22}$ , 215.1794; found, 215.1799.

$[\alpha]_D^{22} = -0.107$  ( $c = 0.088$ ,  $CHCl_3$ )

Conservation of Chirality: Enantiomers were separated by GC Varian Capillary Column CP-Chirasil-Dex CB, 25 m/0.25 mm/0.25  $\mu$ m. Method: hold 2 min at 50  $^{\circ}C$ ; increase 5  $^{\circ}C/min$  to 180  $^{\circ}C$ ; hold 15 min at 180  $^{\circ}C$

(-)- $\beta$ -citronellene: 3.59:1 (R)/(S)

Product **3s**: 3.48:1 (R)/(S)

Therefore, there is **97% conservation of chirality** from starting alkene to product

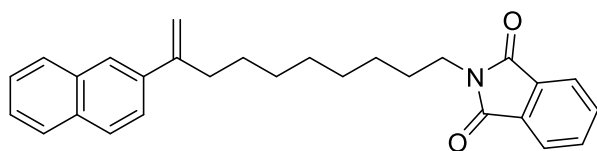

**2-(9-(Naphthalen-2-yl)dec-9-en-1-yl)isoindoline-1,3-dione (3t):**

*From ArOTf*: Following the general procedure **A**, Ligand **1** (34.2 mg, 0.06 mmol, 0.12 equiv),  $Ni(cod)_2$  (13.8 mg, 0.05 mmol, 0.10 equiv), THF (500  $\mu$ L, 1 M), DABCO (168 mg, 1.5 mmol, 3.0 equiv), 2-(dec-9-en-1-yl)isoindoline-1,3-dione (207  $\mu$ L, 0.75 mmol, 1.5 equiv), and 2-naphthyl trifluoromethanesulfonate (138.0 mg, 0.5 mmol, 1.0 equiv) were added to an 8 mL vial and stirred at 60  $^{\circ}C$  for 24 h in a nitrogen-filled glovebox. When the reaction was done, it was removed from the glovebox and 3.0 mL benzene was added. An aliquot was taken for GC analysis as described

above. The mixture was passed through a silica plug with benzene as the eluent and concentrated. Column chromatography (Biotage 25g HP-sil, 1–10% ethyl acetate with [2% Et<sub>3</sub>N in hexanes] as an eluent) afforded 188.5 mg (92%) **3t** as a white solid (rr pre-purification 23.2, rr post-purification: 9.3, br/l<sub>n</sub> 43:1 determined by GC analysis). Note: Because of the high molecular weight of the product, the following GC method was used: 50 °C for 2 min, 20 °C/min to 320 °C, hold at 320 °C for 25 min.

<sup>1</sup>H NMR (600 MHz, CDCl<sub>3</sub>) δ 7.86–7.79 (m, 6H), 7.71 (dd, *J* = 5.5, 3.0 Hz, 2H), 7.58 (dd, *J* = 8.4, 1.7 Hz, 1H), 7.46 (tt, *J* = 8.0, 6.6 Hz, 2H), 5.41 (app s, 1H), 5.15 (app s, 1H), 3.67 (t, *J* = 7.3 Hz, 2H), 2.61 (t, *J* = 7.6 Hz, 2H), 1.66 (quin, *J* = 7.5 Hz, 2H), 1.49 (quin, *J* = 7.4 Hz, 2H), 1.39–1.25 (m, 8H).

<sup>13</sup>C {<sup>1</sup>H} NMR (100 MHz, CDCl<sub>3</sub>) δ 168.4, 148.5, 138.6, 133.8, 133.4, 132.7, 132.1, 128.1, 127.7, 127.5, 126.0, 125.6, 124.7, 124.6, 123.1, 112.6, 38.0, 35.3, 29.22, 29.19, 29.1, 28.5, 28.2, 26.8.

IR (ATR, cm<sup>-1</sup>) 3057, 2925, 2853, 1771, 1706, 1617, 1506, 1465, 1432, 1393, 1365, 1058, 1015, 888, 858, 819, 751, 717.

HRMS (*m/z*) [M + H]<sup>+</sup> calcd for C<sub>28</sub>H<sub>29</sub>NO<sub>2</sub>, 412.2271; found, 412.2286.

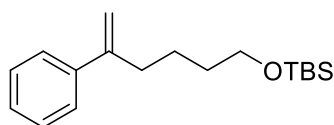

***tert*-Butyldimethyl((5-phenylhex-5-en-1-yl)oxy)silane (**3u**):**

*From PhOTf:* Following the general procedure **A**, Ligand **1** (34.2 mg, 0.06 mmol, 0.12 equiv), Ni(cod)<sub>2</sub> (13.8 mg, 0.05 mmol, 0.10 equiv), THF (500 μL, 1 M), DABCO (168 mg, 1.5 mmol, 3.0 equiv), the TBS-protected alkenol (199 μL, 0.75 mmol, 1.5 equiv), and phenyl trifluoromethanesulfonate (81 μL, 0.5 mmol, 1.0 equiv) were added to an 8 mL vial and stirred at 60 °C for 24 h in a nitrogen-filled glovebox. When the reaction was done, it was removed from the glovebox and 3.0 mL benzene was added. An aliquot was taken for GC analysis as described above. The mixture was passed through a silica plug with benzene as the eluent and concentrated. Column chromatography (Biotage 25g HP-sil, pretreated with Et<sub>3</sub>N, 100% hexanes then subsequent resubjection of mixed fractions to same column to separate product from remaining alkene) afforded 114.8 mg (79%) of **3u** as a colorless oil (rr pre-purification 31.2, rr post purification: 35.6, br/ln: 77:1 determined by GC analysis).

*From PhCl:* Following the general procedure **B**, Ligand **1** (34.2 mg, 0.06 mmol, 0.12 equiv), Ni(cod)<sub>2</sub> (13.8 mg, 0.05 mmol, 0.10 equiv), Toluene (500 μL), DABCO (280 mg, 2.5 mmol, 5.0 equiv), the TBS-protected alkenol (199 μL, 0.75 mmol, 1.5 equiv), and chlorobenzene (50.9 μL, 0.5 mmol, 1.0 equiv) were added to an 8 mL vial. Toluene (500 μL) was used to rinse down the sides of the vial, and triethylsilyl trifluoromethanesulfonate (226 μL, 1.0 mmol, 2.0 equiv) was added, and the reaction was stirred at 60 °C for 24 h in a nitrogen-filled glovebox. When the reaction was done, it was removed from the glovebox. Dry methanol (400 μL) was added to

quench, and the reaction was stirred for 20 min at room temperature (capped). Benzene (3 mL) was then added, and an aliquot was taken for GC analysis as described above. The mixture was passed through a silica plug with benzene as the eluent and concentrated. Column chromatography (Biotage 25g HP-sil, pretreated with Et<sub>3</sub>N, 100% hexanes then subsequent resubjection of mixed fractions to same column to separate product from remaining alkene) afforded 91.6 mg (63%) of **3u** as a colorless oil (rr pre-purification: 25.7, rr post purification: 29.8, br/l<sub>n</sub>: 59:1 determined by GC analysis).

<sup>1</sup>H NMR (600 MHz, CDCl<sub>3</sub>) δ 7.42–7.40 (m, 2H), 7.33 (ddd, *J* = 7.7, 6.8, 1.1 Hz, 2H), 7.28–7.25 (m, 1H), 5.28 (d, *J* = 1.5 Hz, 1H), 5.07 (app q, *J* = 1.4 Hz, 1H), 3.60 (t, *J* = 6.4 Hz, 2H), 2.53 (td, *J* = 7.4, 1.3 Hz, 2H), 1.60–1.46 (m, 4H), 0.88 (s, 9H), 0.04 (s, 6H).

<sup>13</sup>C {<sup>1</sup>H} NMR (100 MHz, CDCl<sub>3</sub>) δ 148.5, 141.3, 128.2, 127.2, 126.1, 112.2, 63.0, 35.1, 32.4, 26.0, 24.4, 18.3, –5.3.

IR (ATR, cm<sup>-1</sup>) 2929, 2857, 2359, 1627, 1495, 1495, 1472, 1388, 1361, 1253, 1098, 1006, 975, 893, 833, 773, 701, 661.

HRMS (*m/z*) [M + H]<sup>+</sup> calcd for C<sub>18</sub>H<sub>30</sub>SiO, 291.2139; found, 291.2137.



## Synthesis of Substrates and Authentic Product Samples

### Non-Commercially Available Alkenes:

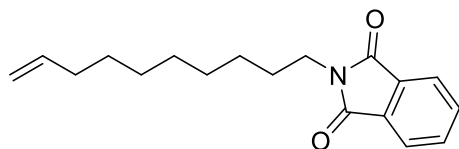

**2-(Dec-9-en-1-yl)isoindoline-1,3-dione (S12):**<sup>7</sup> To a suspension of 9-decen-1-ol (1.4 mL, 7.85 mmol, 1.0 equiv), phthalimide (1.15 g, 7.85 mmol, 1.0 equiv) and triphenylphosphine (2.06 g, 7.85 mmol, 1.0 equiv) in THF (24 mL, 0.33 M) at 0 °C was added dropwise diisopropyl azodicarboxylate (DIAD) (1.55 mL, 7.85 mmol, 1.0 equiv). The reaction mixture was allowed to warm to room temperature and stirred overnight. 100 mL Et<sub>2</sub>O was added and the slurry was filtered to remove triphenylphosphine oxide. The filtrate was concentrated. Column chromatography (Biotage 50 g HP-sil, 1–18% ethyl acetate/hexanes) afforded 1.60 g (71%) of **S12** as a clear oil. The product was transferred to a vial, sparged with N<sub>2</sub> for 20 min, and dried over 3Å mol sieves overnight before using in the Heck reaction.

<sup>1</sup>H NMR (600 MHz, CDCl<sub>3</sub>) δ 7.85 (dd, *J* = 5.4, 3.0 Hz, 2H), 7.71 (dd, *J* = 5.4, 3.0 Hz, 2H), 5.80 (ddt, *J* = 16.9, 10.1, 6.7 Hz, 1H), 4.99 (ddt, *J* = 17.2, 1.8, 1.7 Hz, 1H), 4.92 (ddt, *J* = 10.2, 2.2, 1.3 Hz, 1H), 3.68 (t, *J* = 7.3 Hz, 2H), 2.06–2.00 (m, 2H), 1.67 (app quin, *J* = 7.3 Hz, 2H), 1.38–1.25 (m, 10H).

<sup>7</sup> Procedure adopted from: Hattori, K.; Sajiki, H.; Hirota, K. *Tetrahedron* **2000**, 56, 8433–8441.

$^{13}\text{C}$  { $^1\text{H}$ } NMR (100 MHz,  $\text{CDCl}_3$ )  $\delta$  168.4, 139.1, 133.7, 132.1, 123.1, 114.1, 38.0, 33.7, 29.3, 29.1, 29.0, 28.8, 28.5, 26.8.

The  $^1\text{H}$  and  $^{13}\text{C}$  NMR spectra are in agreement with those reported in the literature.<sup>8</sup>

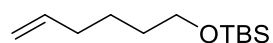

**tert-Butyl(hex-5-en-1-yloxy)dimethylsilane (S13):** To a solution of 5-hexen-1-ol (2.70 mL, 22.5 mmol, 1.0 equiv) in DMF (22.5 mL, 1 M) was added imidazole (4.59 g, 67.4 mmol, 3.0 equiv) followed by *tert*-butyldimethylsilyl chloride (4.41 g, 29.2 mmol, 1.3 equiv). The reaction mixture was stirred at room temperature overnight. The reaction was quenched by the addition of 20 mL saturated aq.  $\text{NH}_4\text{Cl}$ .  $\text{Et}_2\text{O}$  (80 mL) and  $\text{H}_2\text{O}$  (70 mL) were added, and the layers were separated. The aqueous layer was extracted with  $\text{Et}_2\text{O}$  (2x70 mL), and the combined organic layers were washed with brine (100 mL), dried over  $\text{MgSO}_4$ , filtered, and concentrated. Column chromatography (Biotage 100 g HP-Sil, 0–6% ethyl acetate/hexanes) afforded 3.38 g (70%) of **S13** as a clear oil. The product was transferred to a vial, sparged with  $\text{N}_2$  for 20 min, and dried over  $3\text{\AA}$  mol sieves overnight before using in the Heck reaction.

---

<sup>8</sup> Makado, G.; Morimoto, T.; Sugimoto, Y.; Tsutsumi, K.; Kagawa, N.; Kakiuchi, K. *Adv. Synth. Catal.* **2010**, 352, 299–304.

$^1\text{H}$  NMR (600 MHz,  $\text{CDCl}_3$ )  $\delta$  5.82 (ddt,  $J = 16.9, 10.1, 6.7$  Hz, 1H), 5.01 (ddt,  $J = 17.1, 2.2, 1.6$  Hz, 1H), 4.95 (ddt,  $J = 10.2, 2.4, 1.3$  Hz, 1H), 3.62 (t,  $J = 6.5$  Hz, 2H), 2.07 (tdt,  $J = 7.9, 6.7, 1.4$  Hz, 2H), 1.60–1.49 (m, 2H), 1.48–1.39 (m, 2H), 0.90 (s, 9H), 0.06 (s, 6H).

$^{13}\text{C}$   $\{^1\text{H}\}$  NMR (100 MHz,  $\text{CDCl}_3$ )  $\delta$  138.9, 114.3, 63.1, 33.5, 32.3, 26.0, 25.3, 18.4,  $-5.28$ .

The  $^1\text{H}$  and  $^{13}\text{C}$  NMR spectra are in agreement with those reported in the literature.<sup>9</sup>

### Independent Synthesis of Isomerically Pure Branched Product 3a:

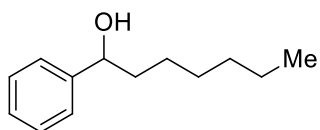

**1-Phenylheptan-1-ol (S14):** To a solution of 1-heptanal (1.27 mL, 9.12 mmol, 1.0 equiv) in  $\text{Et}_2\text{O}$  (29.4 mL) at  $0^\circ\text{C}$  under nitrogen was added a solution of phenyl lithium (1.8 M in *n*-butyl ether, 7.60 mL, 13.7 mmol, 1.5 equiv). The reaction mixture was stirred at  $0^\circ\text{C}$  for 4.5 h. Saturated aq.  $\text{NH}_4\text{Cl}$  (9 mL) was added and stirred for 15 min. Additional  $\text{Et}_2\text{O}$  (50 mL) and  $\text{H}_2\text{O}$  (50 mL) were added, and the layers were separated. The aqueous layer was extracted with  $\text{Et}_2\text{O}$  (2x70 mL), and the combined organic layers were washed with brine (100 mL), dried over  $\text{MgSO}_4$ , filtered, and

<sup>9</sup> Lebel, H.; Paquet, V. *J. Am. Chem. Soc.* **2004**, *126*, 320–328.

concentrated. Column chromatography (Biotage 50 g HP-Sil, 1–10% ethyl acetate/hexanes) afforded 1.32 g (75%) of the desired alcohol as a clear oil.

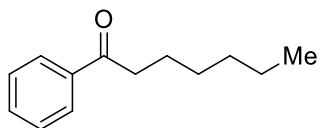

**1-Phenylheptan-1-one (S15):** To a solution of **S14** (1.32g, 6.87 mmol, 1.0 equiv) in  $\text{CH}_2\text{Cl}_2$  (6.90 mL) was added 2,2,6,6-tetramethyl-1-piperidinyloxy (TEMPO) (109 mg, 0.69 mmol, 0.1 equiv) followed by (diacetoxyiodo)benzene (2.44 g, 7.56 mmol, 1.1 equiv). The reaction was stirred at room temperature for 20 h, after which was added saturated aq.  $\text{Na}_2\text{S}_2\text{O}_3$  (5 mL) and allowed to stir an additional 15 min. Additional  $\text{CH}_2\text{Cl}_2$  (50 mL) and  $\text{H}_2\text{O}$  (50 mL) were added, and the layers were separated. The aqueous layer was extracted with  $\text{CH}_2\text{Cl}_2$  (2x70 mL), and the combined organic layers were washed with brine (100 mL), dried over  $\text{MgSO}_4$ , filtered, and concentrated. Column chromatography (Biotage 50 g HP-sil, 1–10% ethyl acetate/hexanes) afforded 1.31 g (quant) of the desired ketone as a clear oil.

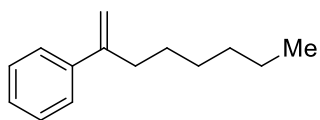

**Oct-1-en-2-ylbenzene (3a):** To a solution of methyltriphenylphosphonium bromide (2.45 g, 6.87 mmol, 1.0 equiv) in  $\text{Et}_2\text{O}$  (21.5 mL) under nitrogen at room temperature was added *n*-butyl lithium (1.6 M in hexanes, 4.3 mL, 6.87 mmol, 1.0 equiv). The bright orange reaction mixture was stirred

at room temperature for 40 min. **S14**, which had been azeotroped from benzene to remove H<sub>2</sub>O was then added slowly, rinsing with an additional amount of Et<sub>2</sub>O (4 mL), and stirred at room temperature for 21 h. The reaction mixture was then poured into H<sub>2</sub>O (70 mL), and extracted with Et<sub>2</sub>O (2x50 mL). The combined organic layers were washed with brine (50 mL), dried over MgSO<sub>4</sub>, filtered, and concentrated. Column chromatography (25 g HP-Sil Biotage column, 100% hexanes) afforded 931 mg (72%) of the desired alkene **3a** as a clear oil. Characterization details listed above.

## Further Reaction Optimization Tables

**Table S1.** Evaluation of different bases.<sup>[a]</sup>

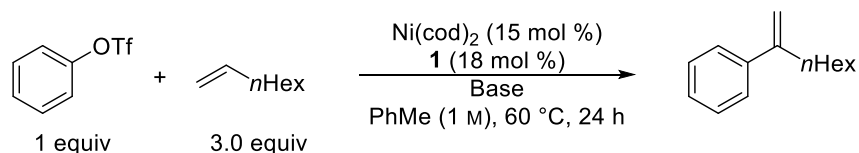

| Entry | Base                                           | Equivalents | Conversion<br>PhOTf (%) | Yield (%)        | br/ln            | rr               |
|-------|------------------------------------------------|-------------|-------------------------|------------------|------------------|------------------|
| 1     | Et <sub>3</sub> N                              | 5.0         | 89                      | 86               | >100:1           | 7.5              |
| 2     | NMeCy <sub>2</sub>                             | 5.0         | 84                      | 75               | 75:1             | 4.3              |
| 3     | Morpholine                                     | 5.0         | 46                      | 39               | 43:1             | 17.3             |
| 4     | Et <sub>2</sub> NH                             | 5.0         | 73                      | 67               | 73:1             | 24.3             |
| 5     | DABCO                                          | 3.0         | 99                      | 100              | >100:1           | 32.3             |
| 6     | Quinuclidine                                   | 3.0         | 99                      | 100              | >100:1           | 37.7             |
| 7     | <sup>n</sup> Bu <sub>3</sub> N                 | 5.0         | 39                      | 39               | 64:1             | 3.0              |
| 8     | Hünig's Base<br>(DIPEA)                        | 5.0         | 22                      | 21               | 90:1             | 4.8              |
| 9     | DBU                                            | 5.0         | 23                      | — <sup>[b]</sup> | — <sup>[b]</sup> | — <sup>[b]</sup> |
| 10    | Urotropine                                     | 3.0         | 10                      | 11               | 61:1             | 10.5             |
| 11    | Proton<br>Sponge                               | 3.0         | 13                      | 16               | 12:1             | 7.6              |
| 12    | Bu <sub>4</sub> NOAc                           | 3.0         | 73                      | 0                | —                | —                |
| 13    | NaHCO <sub>3</sub>                             | 3.0         | 7                       | 2                | —                | —                |
| 14    | K <sub>2</sub> CO <sub>3</sub>                 | 3.0         | 7                       | 1                | —                | —                |
| 15    | K <sub>3</sub> PO <sub>4</sub>                 | 3.0         | 5                       | 2                | —                | —                |
| 16    | CS <sub>2</sub> CO <sub>3</sub> <sup>[c]</sup> | 3.0         | 16                      | 0                | —                | —                |
| 17    | KO <sup>t</sup> Bu <sup>[c]</sup>              | 5.0         | 99                      | 0                | —                | —                |
| 18    | KHMDS <sup>[c]</sup>                           | 3.0         | 99                      | 0                | —                | —                |

[a] Conversions and yields determined by GC with dodecane as internal standard [b] Product overlapped with base in chromatogram [c] with dcy pb instead of Ligand **1**

**Table S2.** Evaluation of different solvents.<sup>[a]</sup>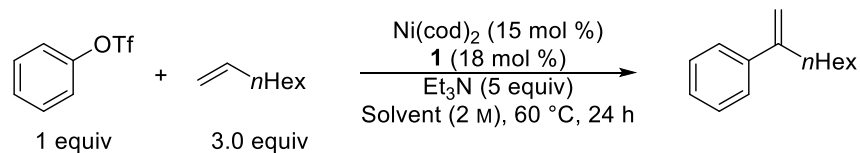

| Entry | Solvent                          | Conversion<br>PhOTf (%) | Yield (%) | br/ln  | rr   |
|-------|----------------------------------|-------------------------|-----------|--------|------|
| 1     | Neat                             | 75                      | 79        | >100:1 | 10.7 |
| 2     | Toluene                          | 89                      | 86        | >100:1 | 7.5  |
| 3     | Benzene                          | 96                      | 91        | >100:1 | 5.4  |
| 4     | THF                              | 96                      | 93        | >100:1 | 7.4  |
| 5     | 1,4-Dioxane                      | 97                      | 92        | 98:1   | 6.6  |
| 6     | CH <sub>3</sub> CN               | 8                       | 1         | –      | –    |
| 7     | DMF                              | 52                      | 57        | >100:1 | 21.1 |
| 8     | Et <sub>2</sub> O, rt            | 35                      | 37        | >100:1 | 30.2 |
| 9     | CH <sub>2</sub> Cl <sub>2</sub>  | 2                       | 1         | –      | –    |
| 10    | CHCl <sub>3</sub> <sup>[b]</sup> | 0                       | 0         | –      | –    |
| 11    | THF <sup>[b]</sup>               | 97                      | 100       | 82:1   | 33.7 |
| 12    | 1,4-Dioxane <sup>[b]</sup>       | 90                      | 89        | 52:1   | 13:1 |
| 13    | DMF <sup>[b]</sup>               | 38                      | 40        | 71:1   | 32.8 |
| 14    | Et <sub>2</sub> O <sup>[b]</sup> | 34                      | 33        | 122:1  | 45.7 |

[a] Conversions and yields determined by GC with dodecane as internal standard

[b] DABCO (3 equiv) rather than Et<sub>3</sub>N

**Table S3.** Evaluation of counterion exchange reagents for chlorobenzene.<sup>[a]</sup>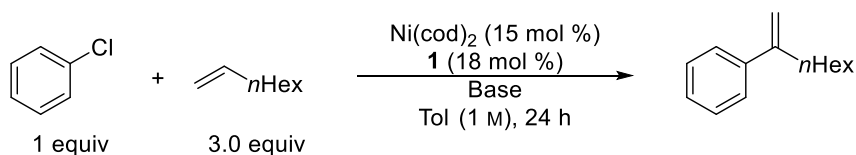

| Entry | Additive (1.75 equiv)                    | Ligand              | Base              | Temp (°C) | Conversion PhCl (%) | Yield (%) | br/ln  |
|-------|------------------------------------------|---------------------|-------------------|-----------|---------------------|-----------|--------|
| 1     | TESOTf                                   | PCy <sub>2</sub> Ph | Et <sub>3</sub> N | rt        | 49                  | 18        | 12:1   |
| 2     | NaClO <sub>4</sub>                       | PCy <sub>2</sub> Ph | Et <sub>3</sub> N | rt        | 28                  | 4         | 1.7:1  |
| 3     | NaOTf                                    | PCy <sub>2</sub> Ph | Et <sub>3</sub> N | rt        | 30                  | 3         | 1.4:1  |
| 4     | AgOTf                                    | PCy <sub>2</sub> Ph | Et <sub>3</sub> N | rt        | 9                   | 0         | –      |
| 5     | TESOTf                                   | PCy <sub>2</sub> Ph | Et <sub>3</sub> N | 60        | 29                  | 14        | 23:1   |
| 6     | NaClO <sub>4</sub>                       | dipp                | Et <sub>3</sub> N | rt        | 17                  | 10        | –      |
| 7     | NaOTf                                    | dipp                | Et <sub>3</sub> N | rt        | 17                  | 11        | –      |
| 8     | AgOTf                                    | dipp                | Et <sub>3</sub> N | rt        | 6                   | 0         | –      |
| 9     | NaBF <sub>4</sub>                        | dipp                | Et <sub>3</sub> N | rt        | 13                  | 0         | –      |
| 10    | NaPF <sub>6</sub>                        | dipp                | Et <sub>3</sub> N | rt        | 17                  | 12        | –      |
| 11    | NaBPh <sub>4</sub>                       | dipp                | Et <sub>3</sub> N | rt        | 20                  | 11        | –      |
| 12    | NaSbF <sub>6</sub>                       | dipp                | Et <sub>3</sub> N | rt        | 15                  | 7         | –      |
| 13    | NaBARF                                   | dipp                | Et <sub>3</sub> N | rt        | 17                  | 10        | 39:1   |
| 14    | none                                     | dcypb               | Et <sub>3</sub> N | 60        | 16                  | 1         | –      |
| 15    | TESOTf                                   | dcypb               | Et <sub>3</sub> N | 60        | 29                  | 21        | –      |
| 16    | TMSOTf                                   | dcypb               | Et <sub>3</sub> N | 60        | 17                  | 14        | –      |
| 17    | TESOTf                                   | Ligand 1            | DABCO             | 60        | 61                  | 64        | 59:1   |
| 18    | TESOTf                                   | Ligand 1            | Et <sub>3</sub> N | 60        | 22                  | 20        | >100:1 |
| 19    | NaOTf                                    | Ligand 1            | DABCO             | 60        | 11                  | 1         | –      |
| 20    | TMSOTf                                   | Ligand 1            | DABCO             | 60        | 14                  | 4         | –      |
| 21    | TESOTf (optimized conds <sup>[b]</sup> ) | Ligand 1            | DABCO             | 60        | 82                  | 87        | 63:1   |
| 22    | TESOTf (undistilled – dark brown/black)  | Ligand 1            | DABCO             | 60        | 71                  | 72        | 42:1   |

[a] Conversions and yields determined by GC with dodecane as internal standard [b] Optimized conditions: Ni(cod)<sub>2</sub> (10 mol %), **1** (12 mol %), DABCO (5 equiv), TESOTf (2 equiv), PhMe (0.5 M), 60 °C, 24 h



**Table S4.** Investigation of electrophiles.<sup>[a]</sup>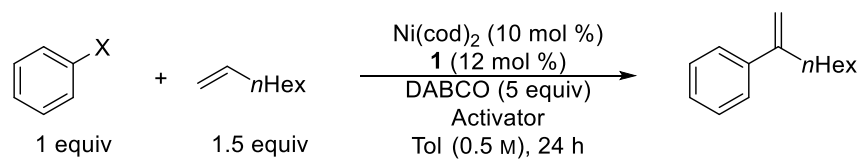

| Entry | X                                 | Activator | Yield (%) | br/ln |
|-------|-----------------------------------|-----------|-----------|-------|
| 1     | Cl                                | TESOTf    | 87        | 63:1  |
| 2     | OMs                               | none      | 25        | –     |
| 3     | OMs                               | TESOTf    | 81        | 60:1  |
| 4     | OTs                               | none      | 33        | 83:1  |
| 5     | OTs                               | TESOTf    | 75        | 39:1  |
| 6     | OSO <sub>2</sub> NMe <sub>2</sub> | none      | 8         | –     |
| 7     | OSO <sub>2</sub> NMe <sub>2</sub> | TESOTf    | 65        | 59:1  |
| 8     | Br                                | none      | 0         | –     |
| 9     | Br                                | TESOTf    | 4         | 13:1  |
| 10    | Br                                | Zn dust   | 1         | –     |
| 11    | I                                 | none      | 0         | –     |
| 12    | I                                 | TESOTf    | 2         | 11:1  |
| 13    | I                                 | AgOTf     | 3         | 2.7:1 |
| 14    | OMe                               | TESOTf    | 0         | –     |
| 15    | OAc                               | TESOTf    | 1         | –     |
| 16    | OCO <sub>2</sub> <sup>t</sup> Bu  | TESOTf    | 0         | –     |
| 17    | F                                 | TESOTf    | 0         | –     |
| 18    | OCOCF <sub>3</sub>                | TESOTf    | 4         | –     |

[a]Conversions and yields determined by GC with dodecane as internal standard

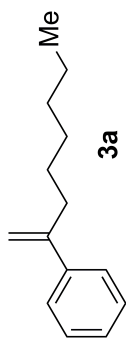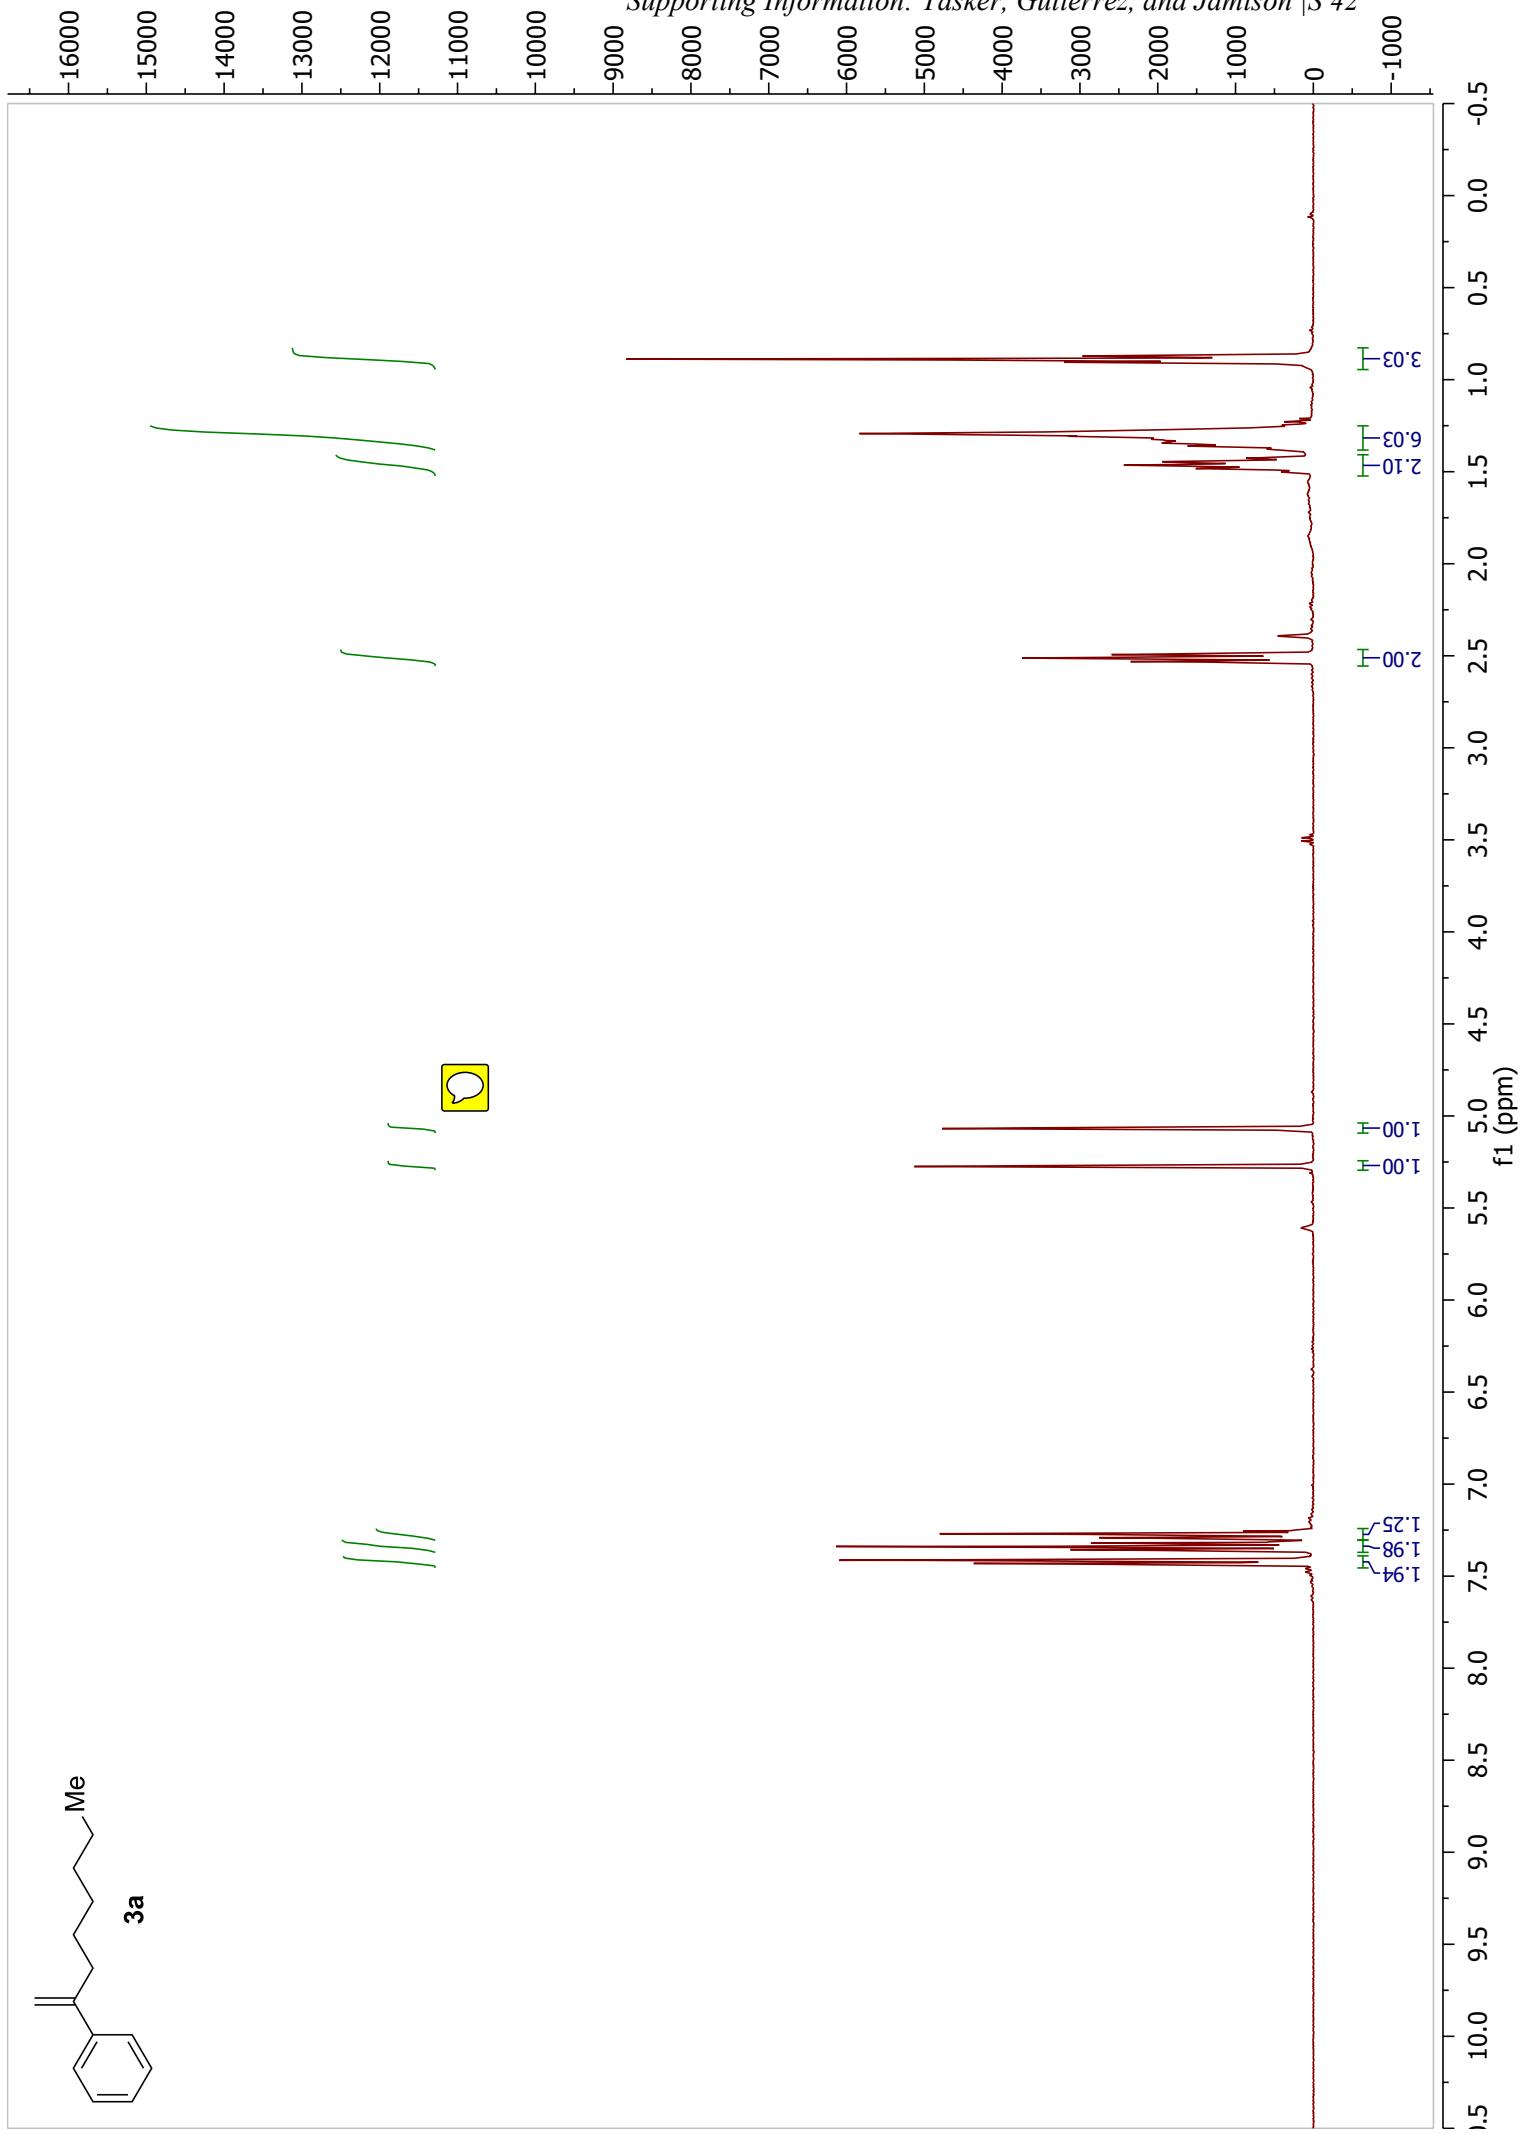

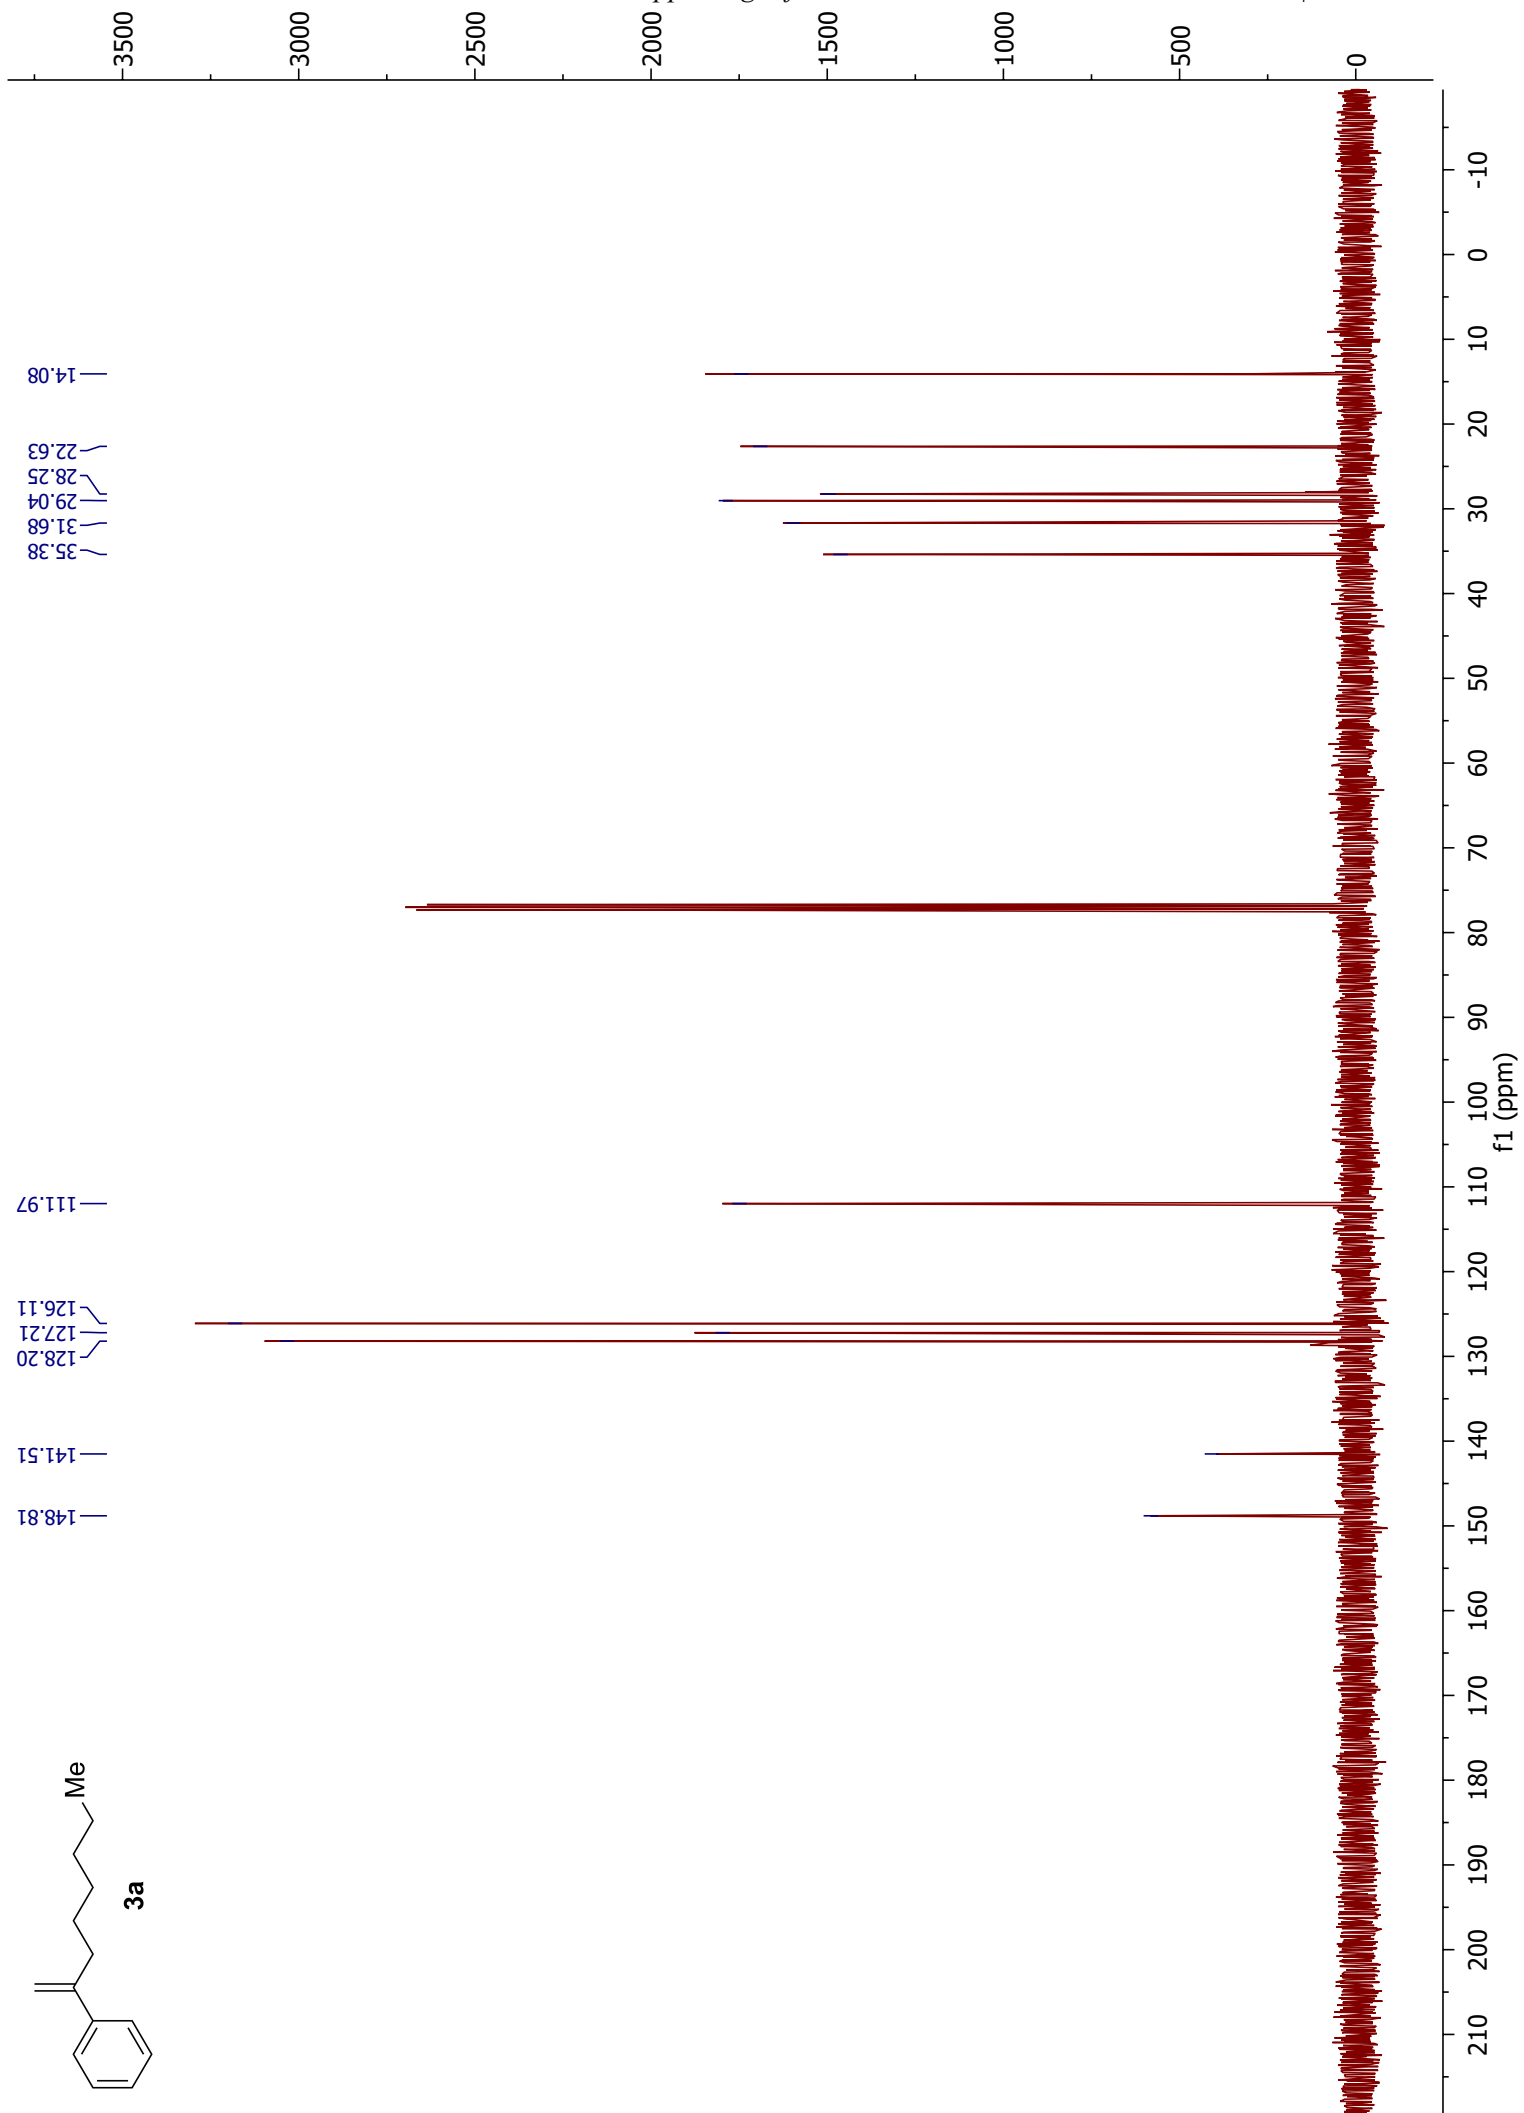

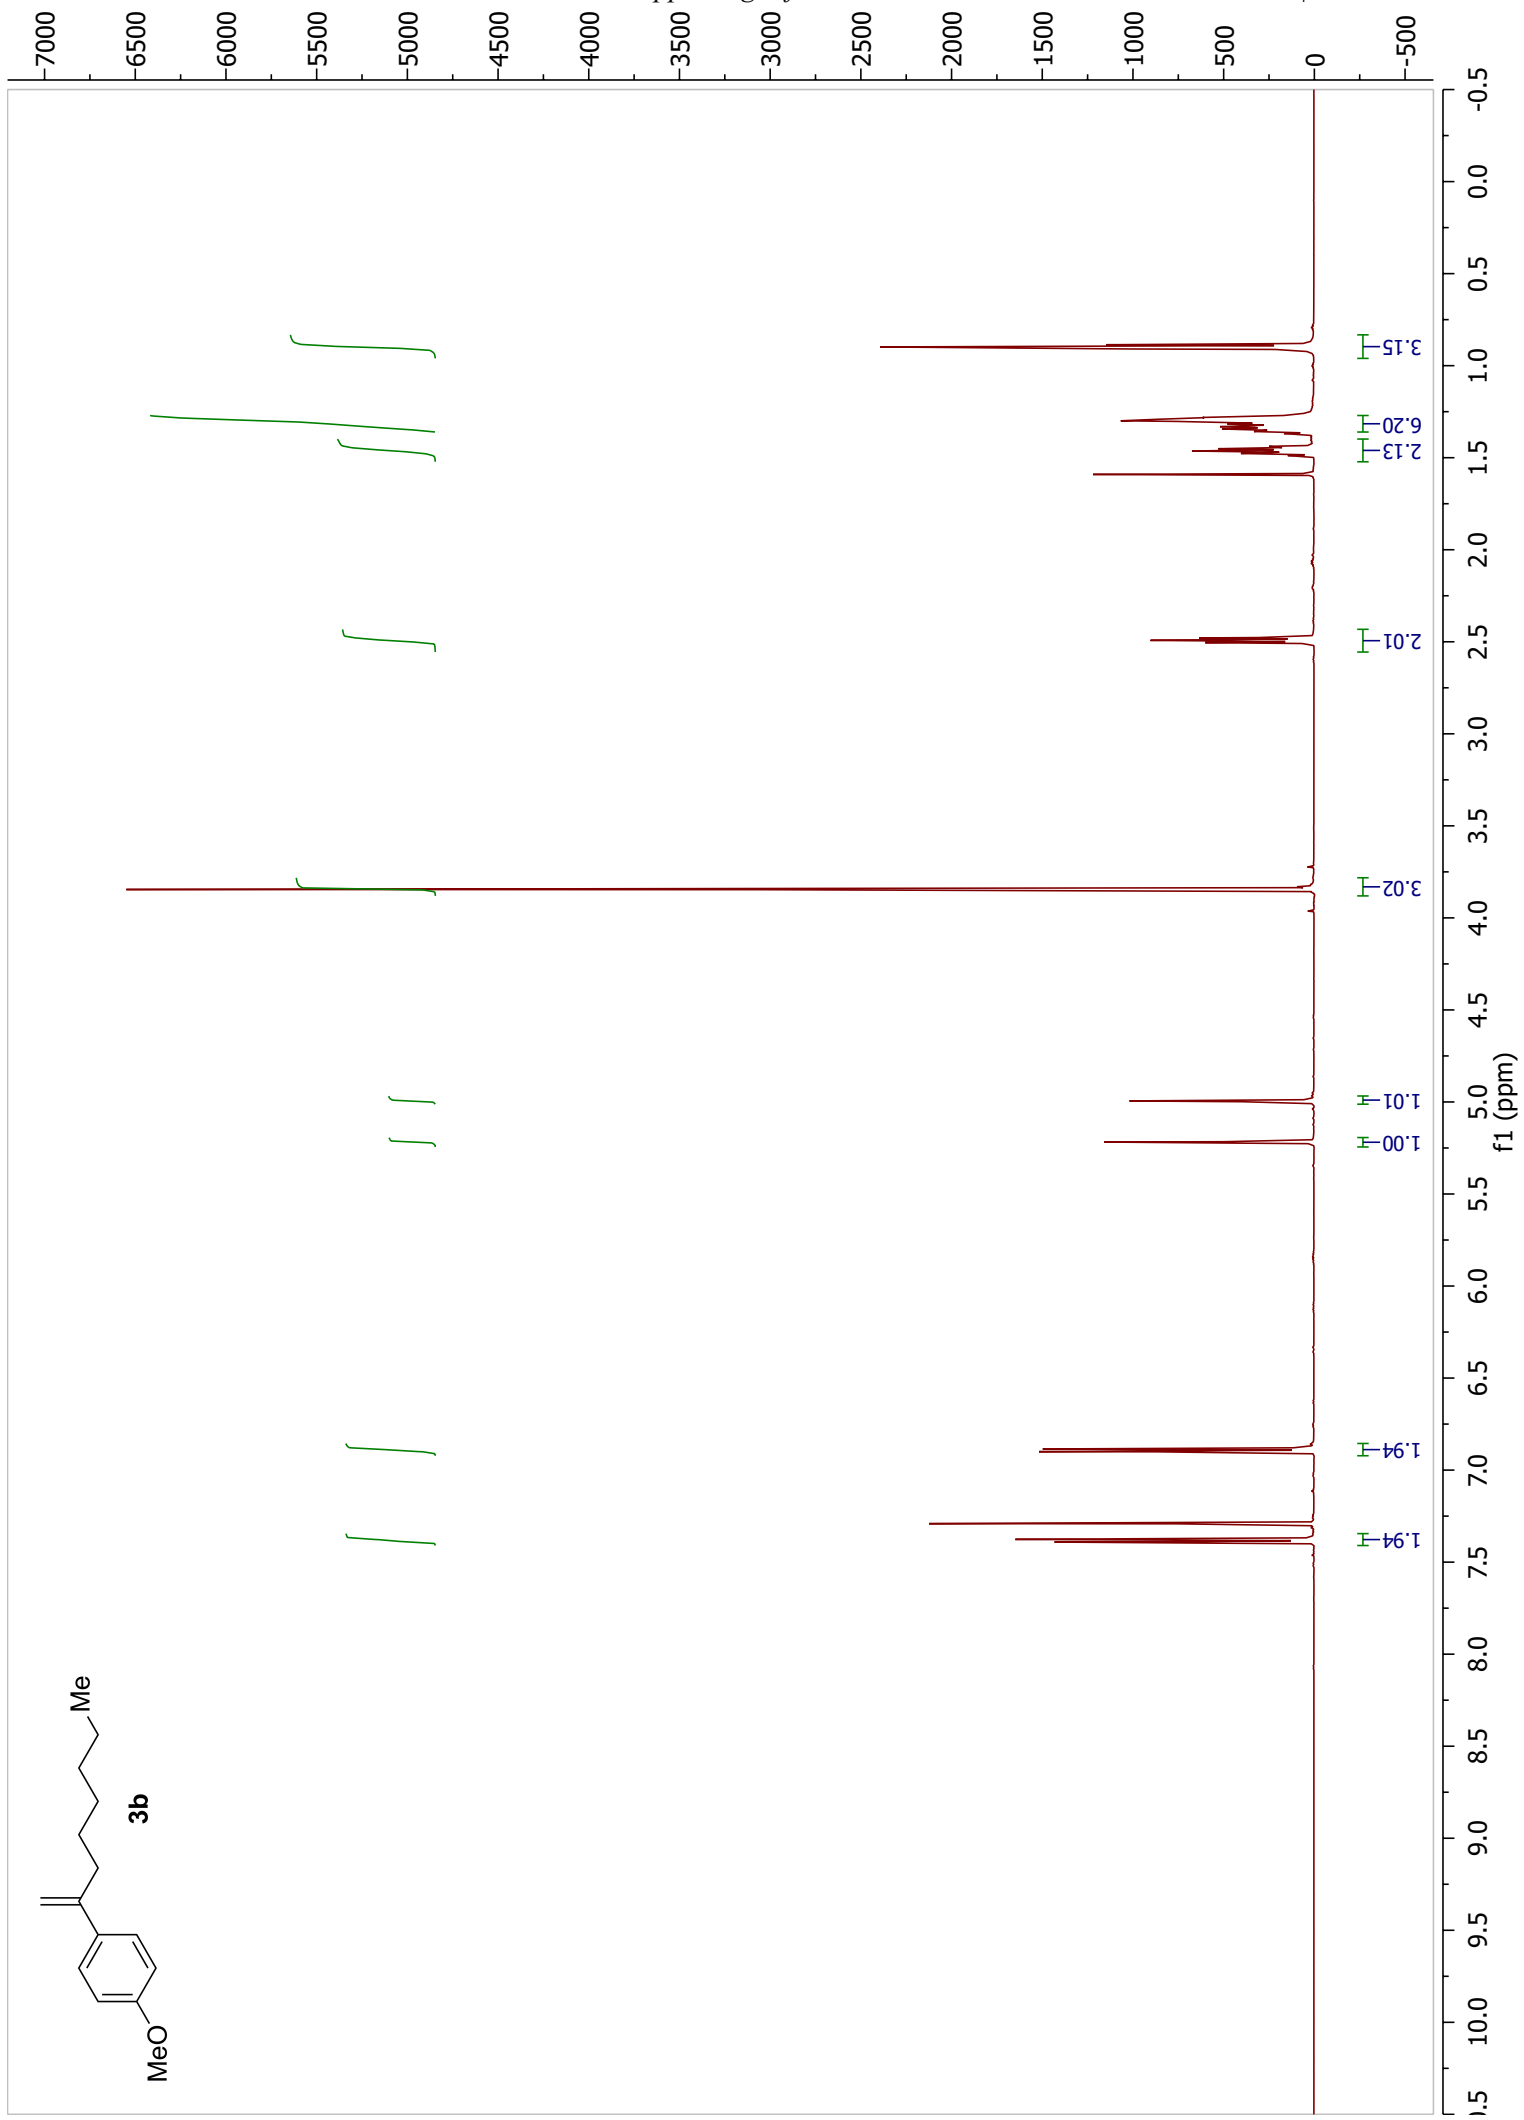

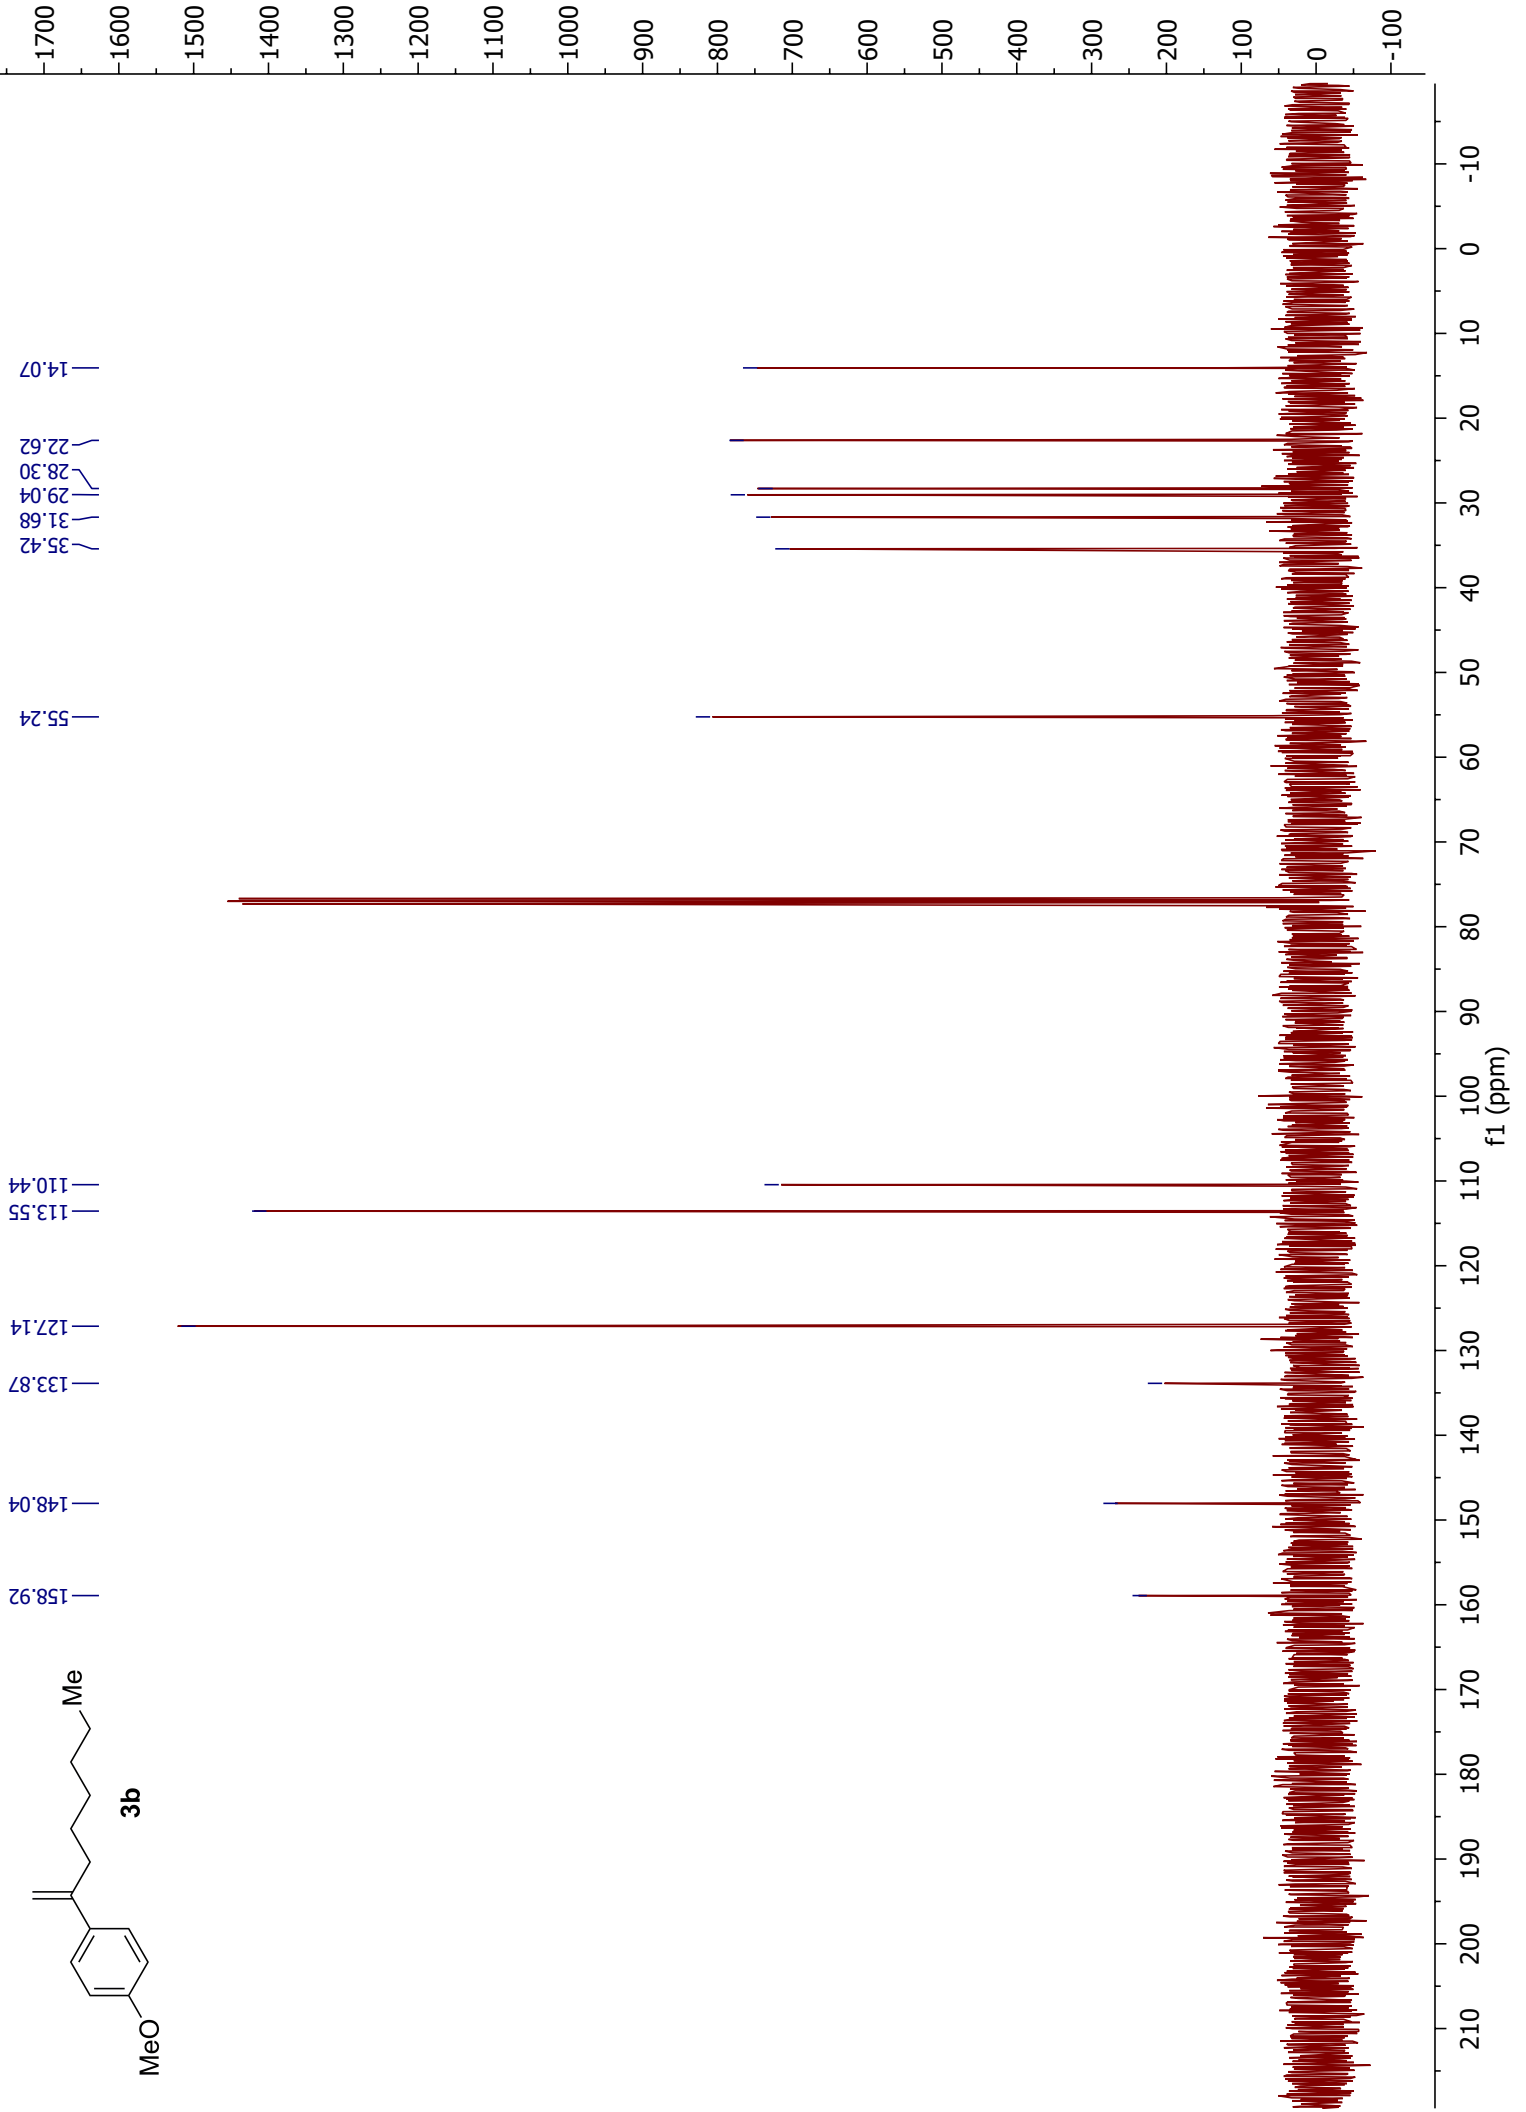

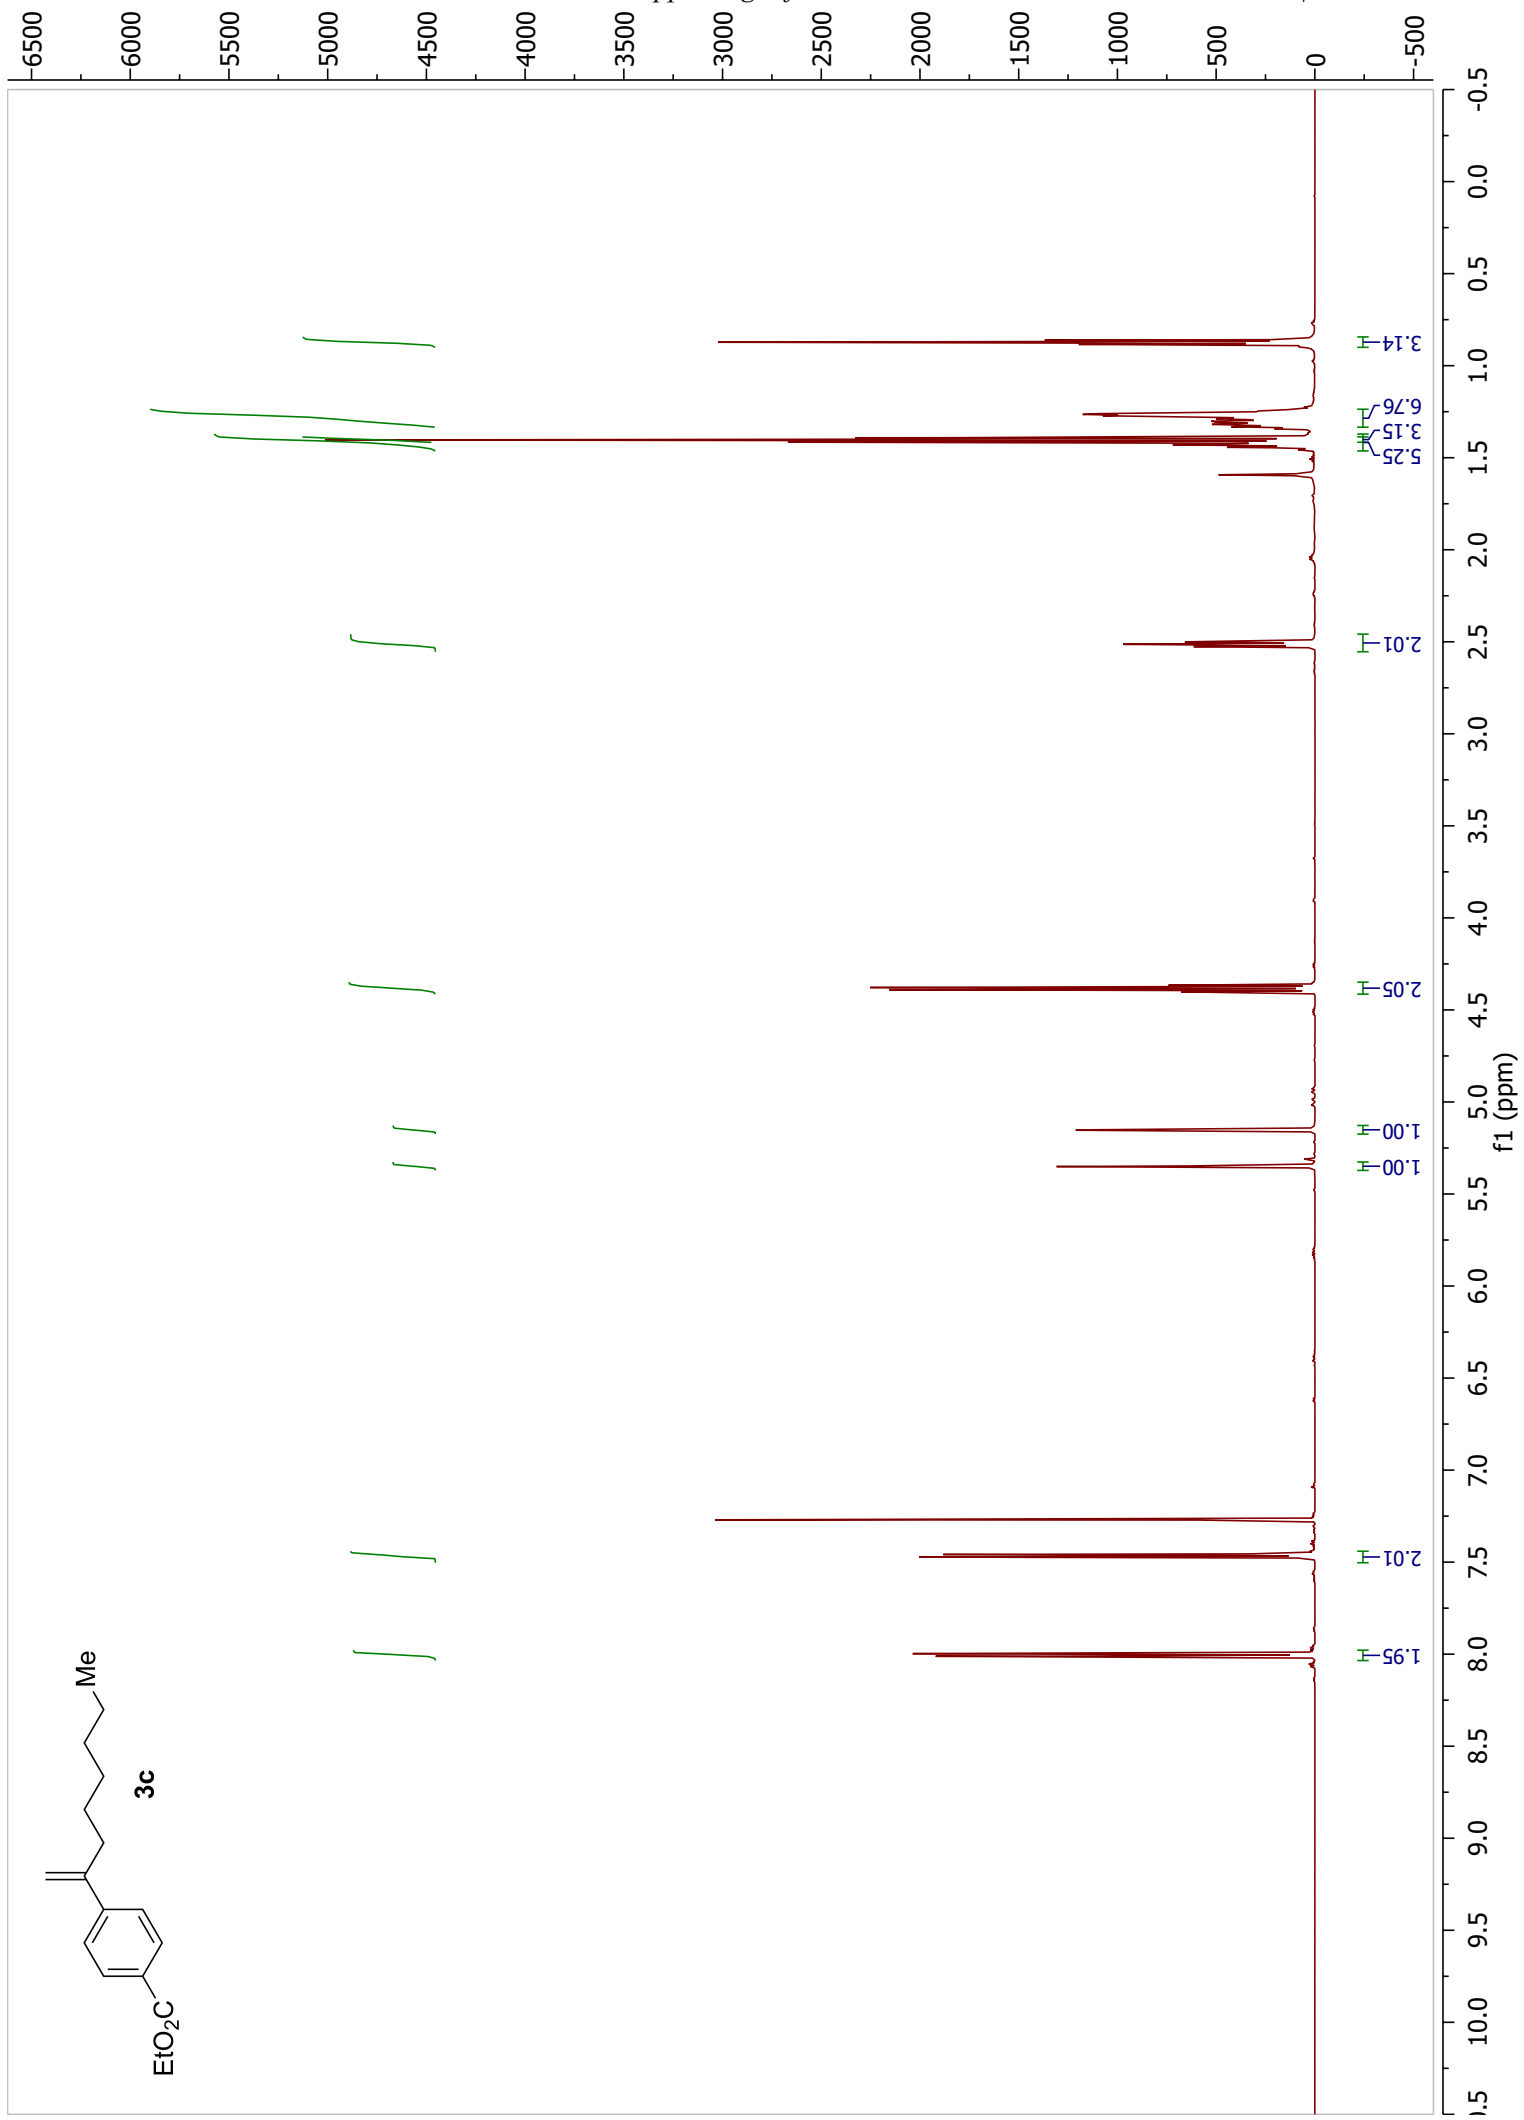

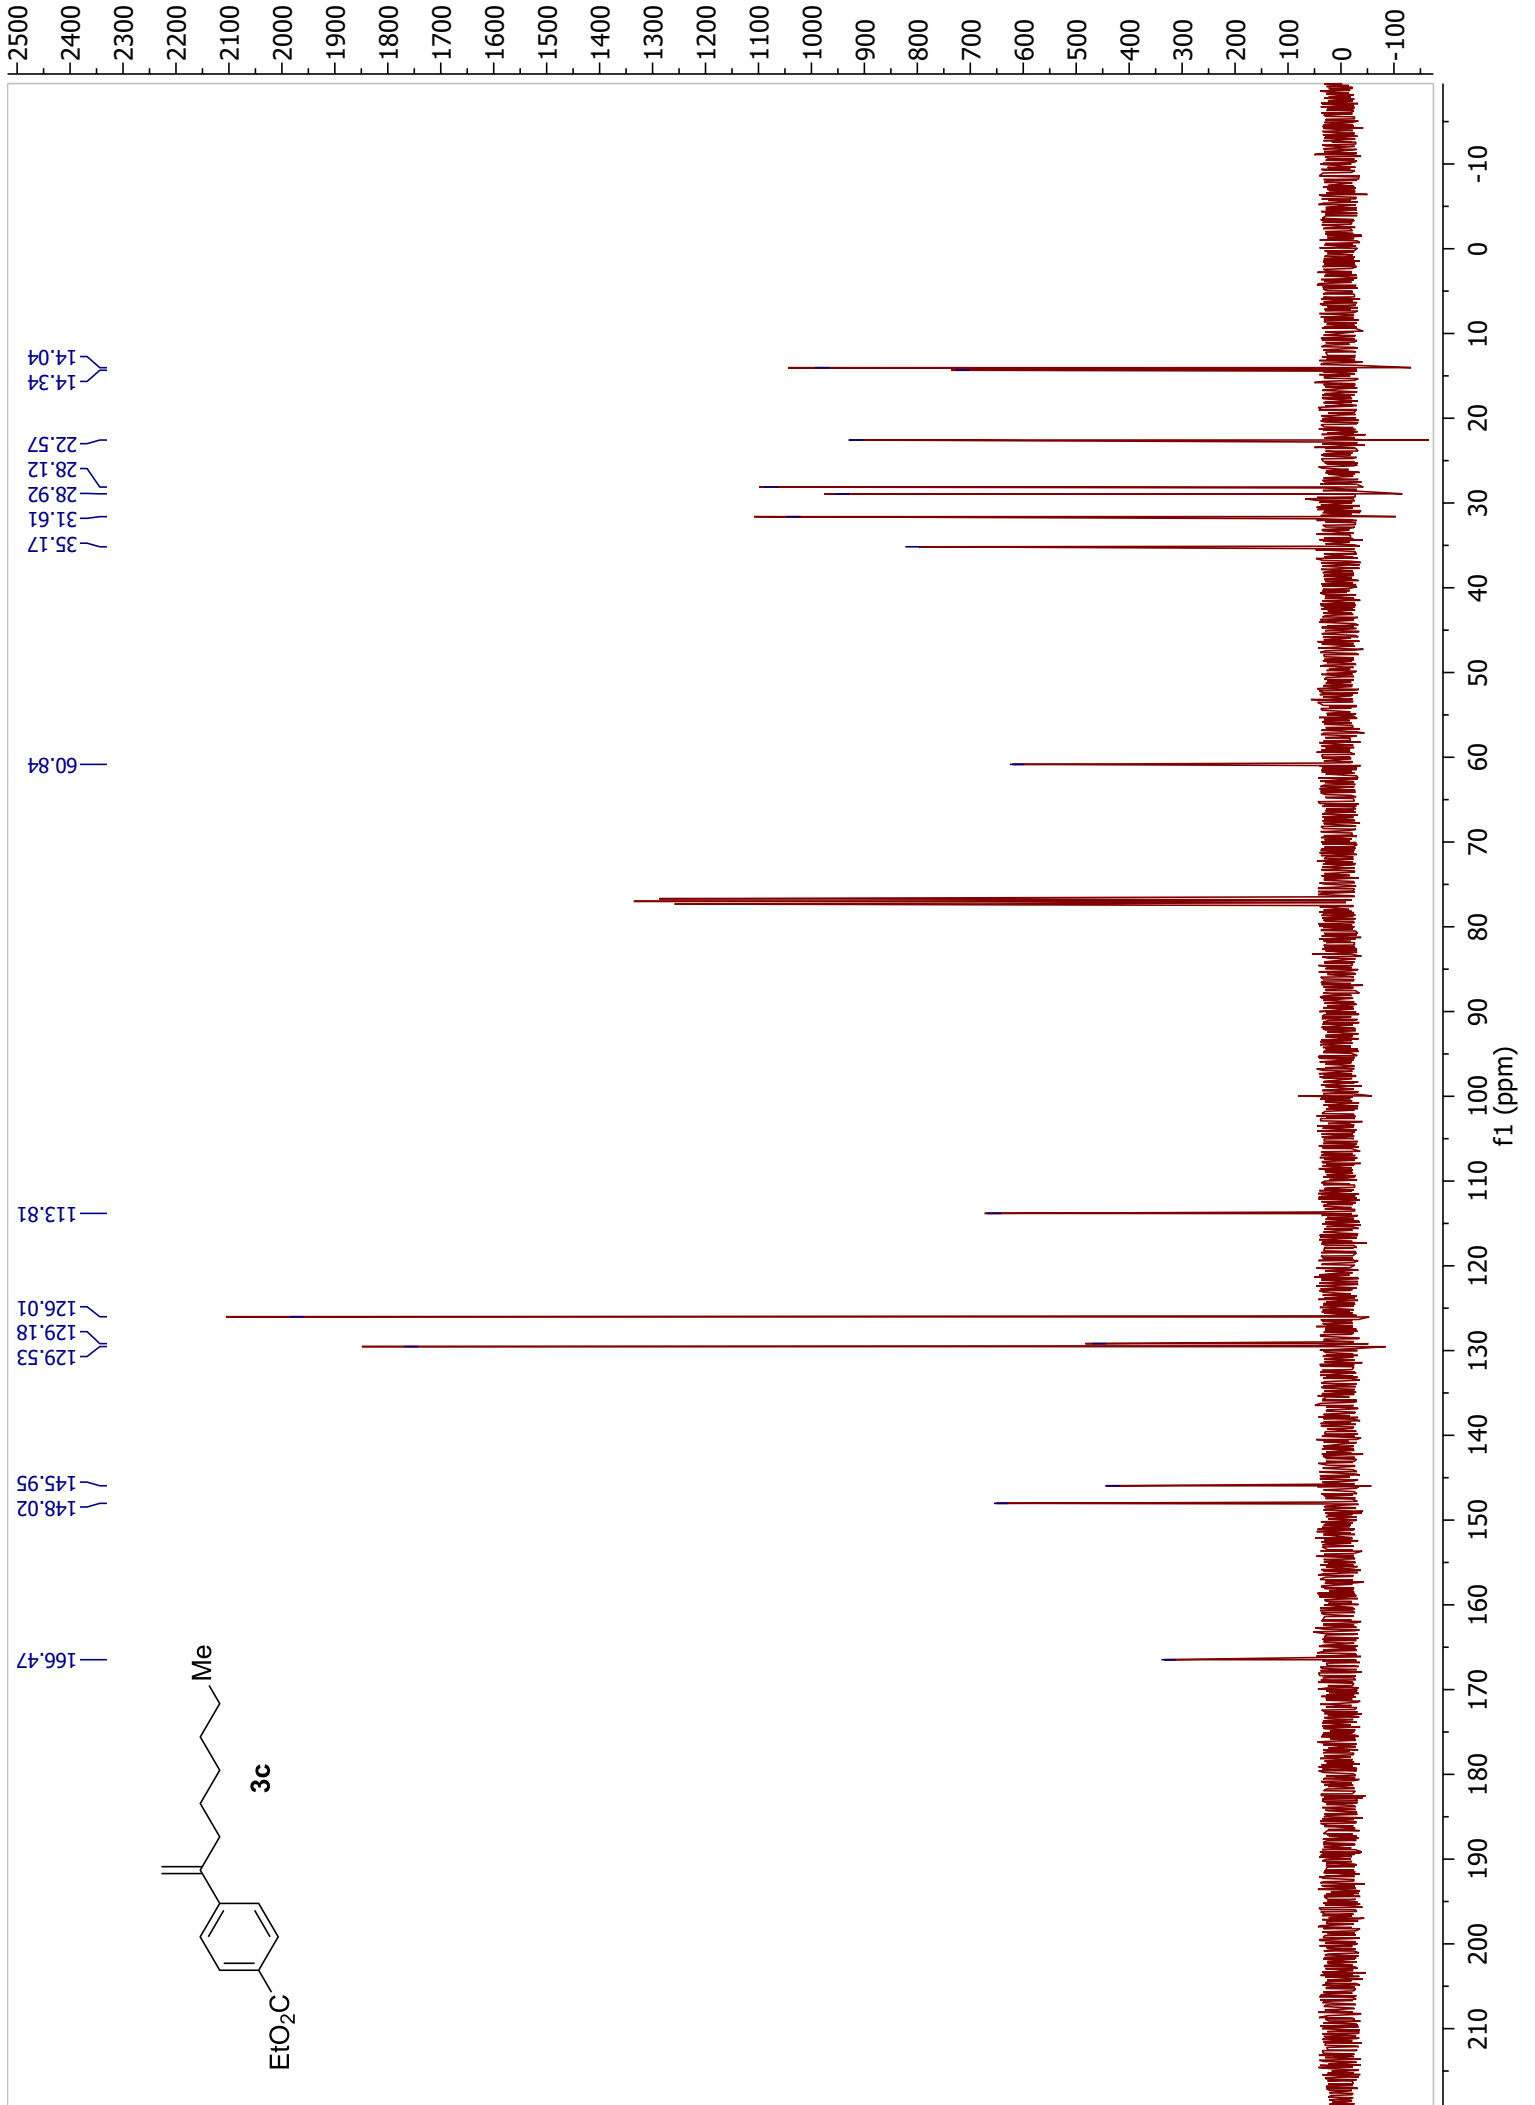

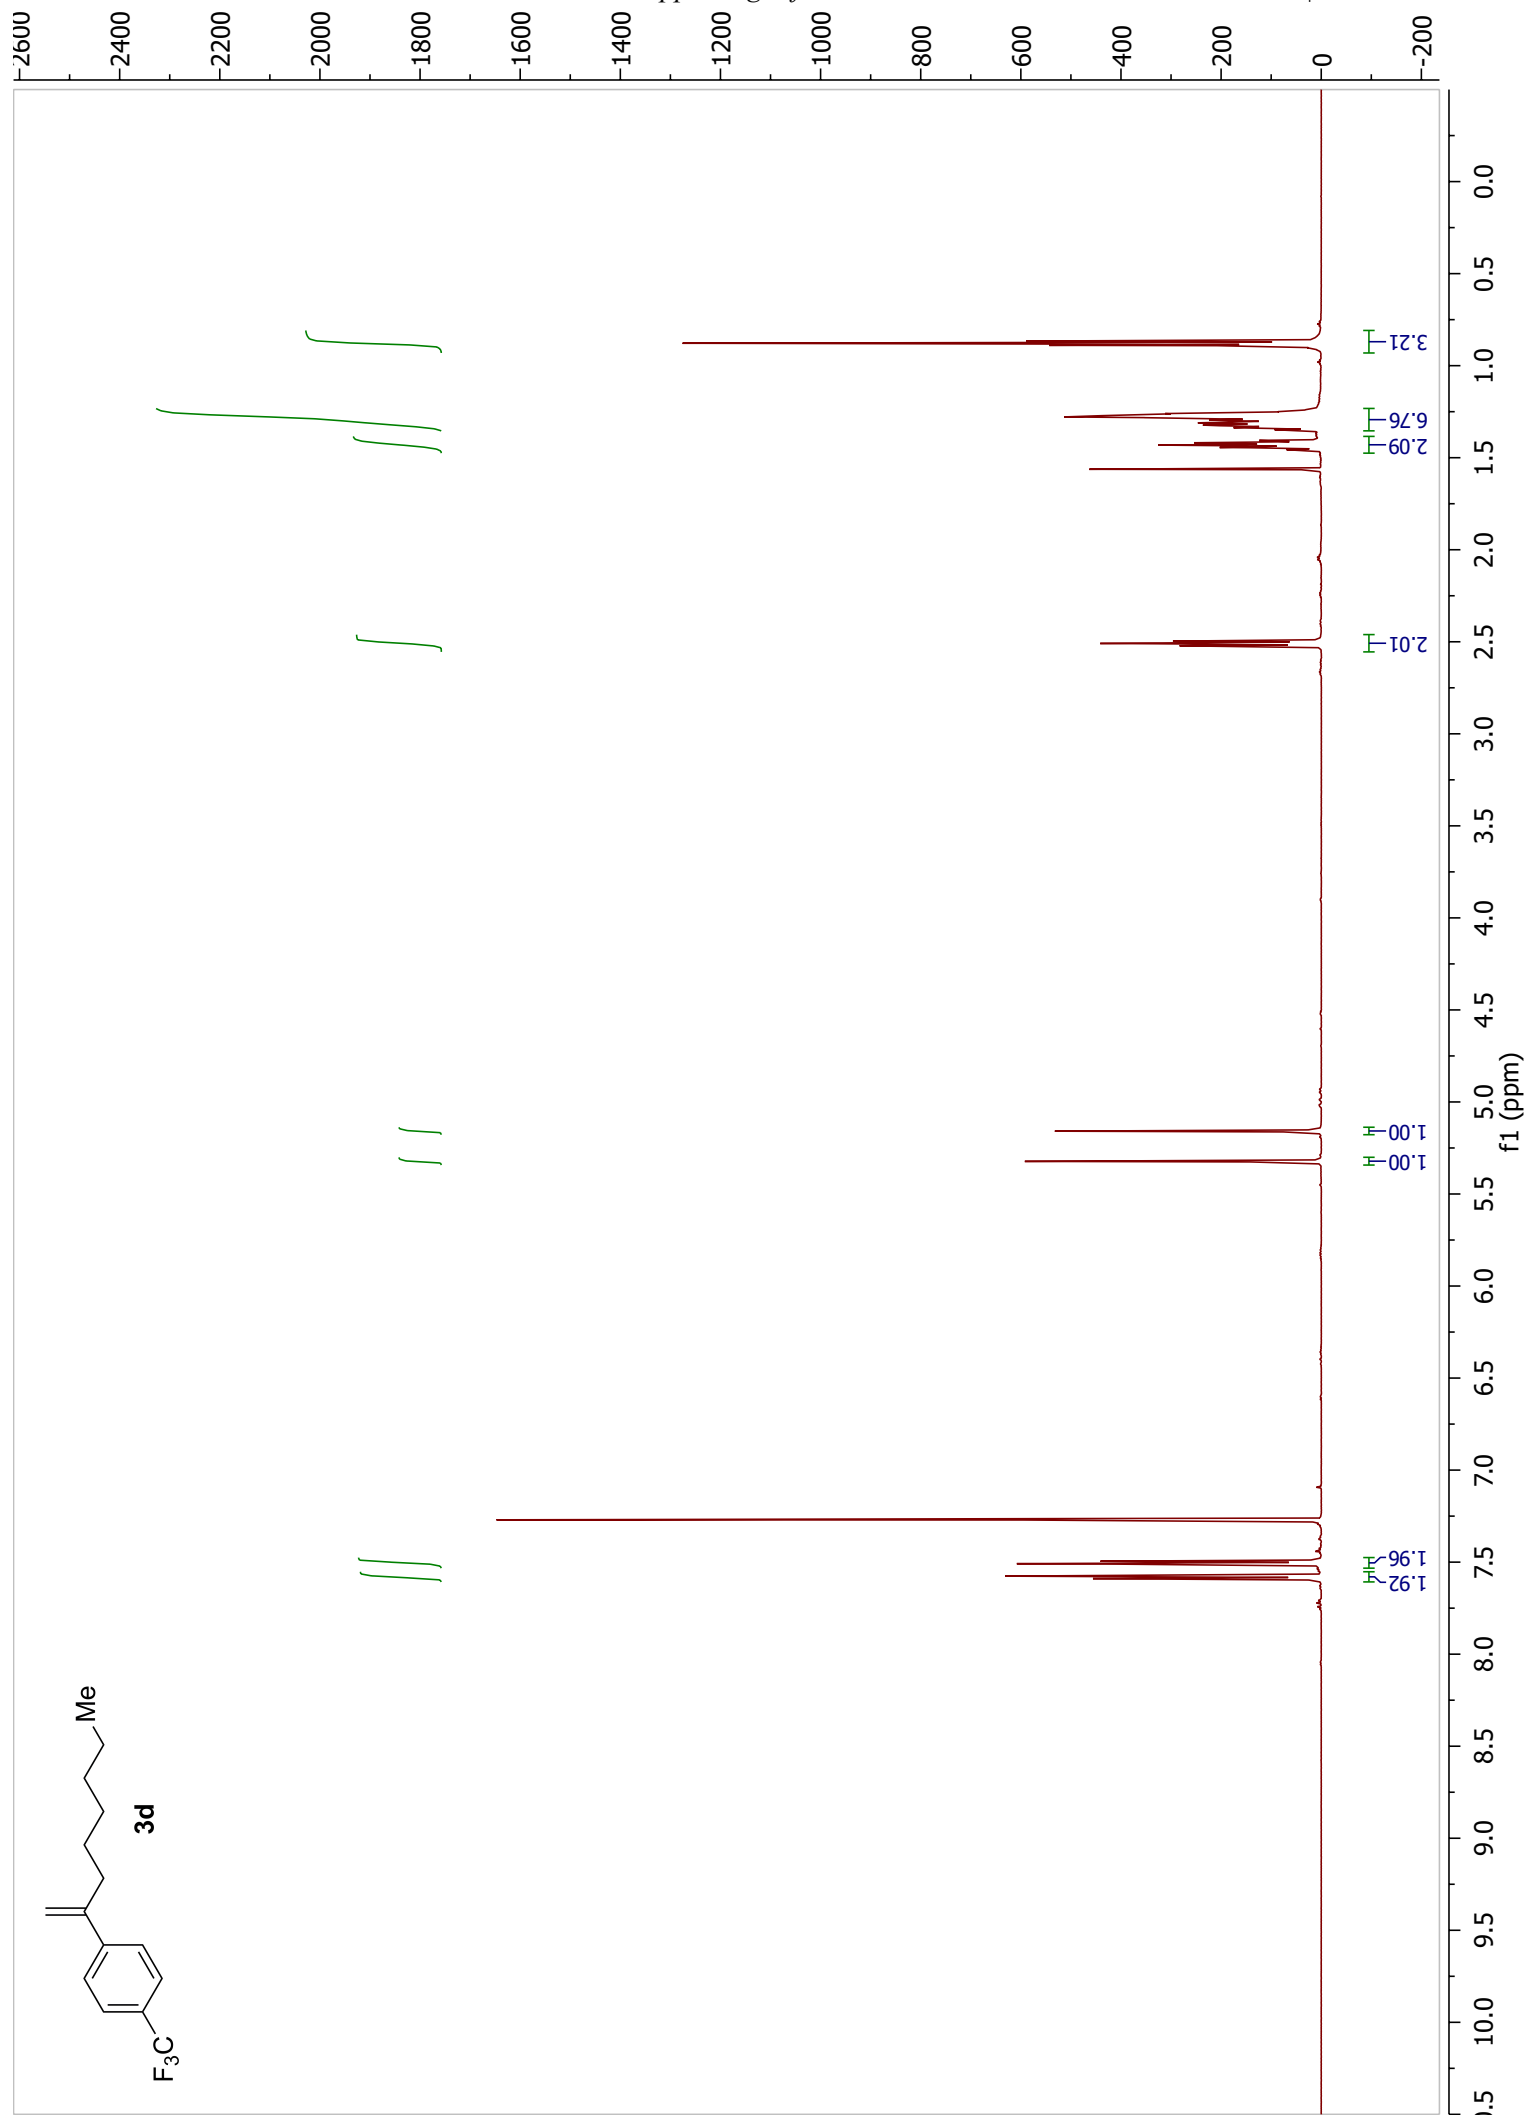





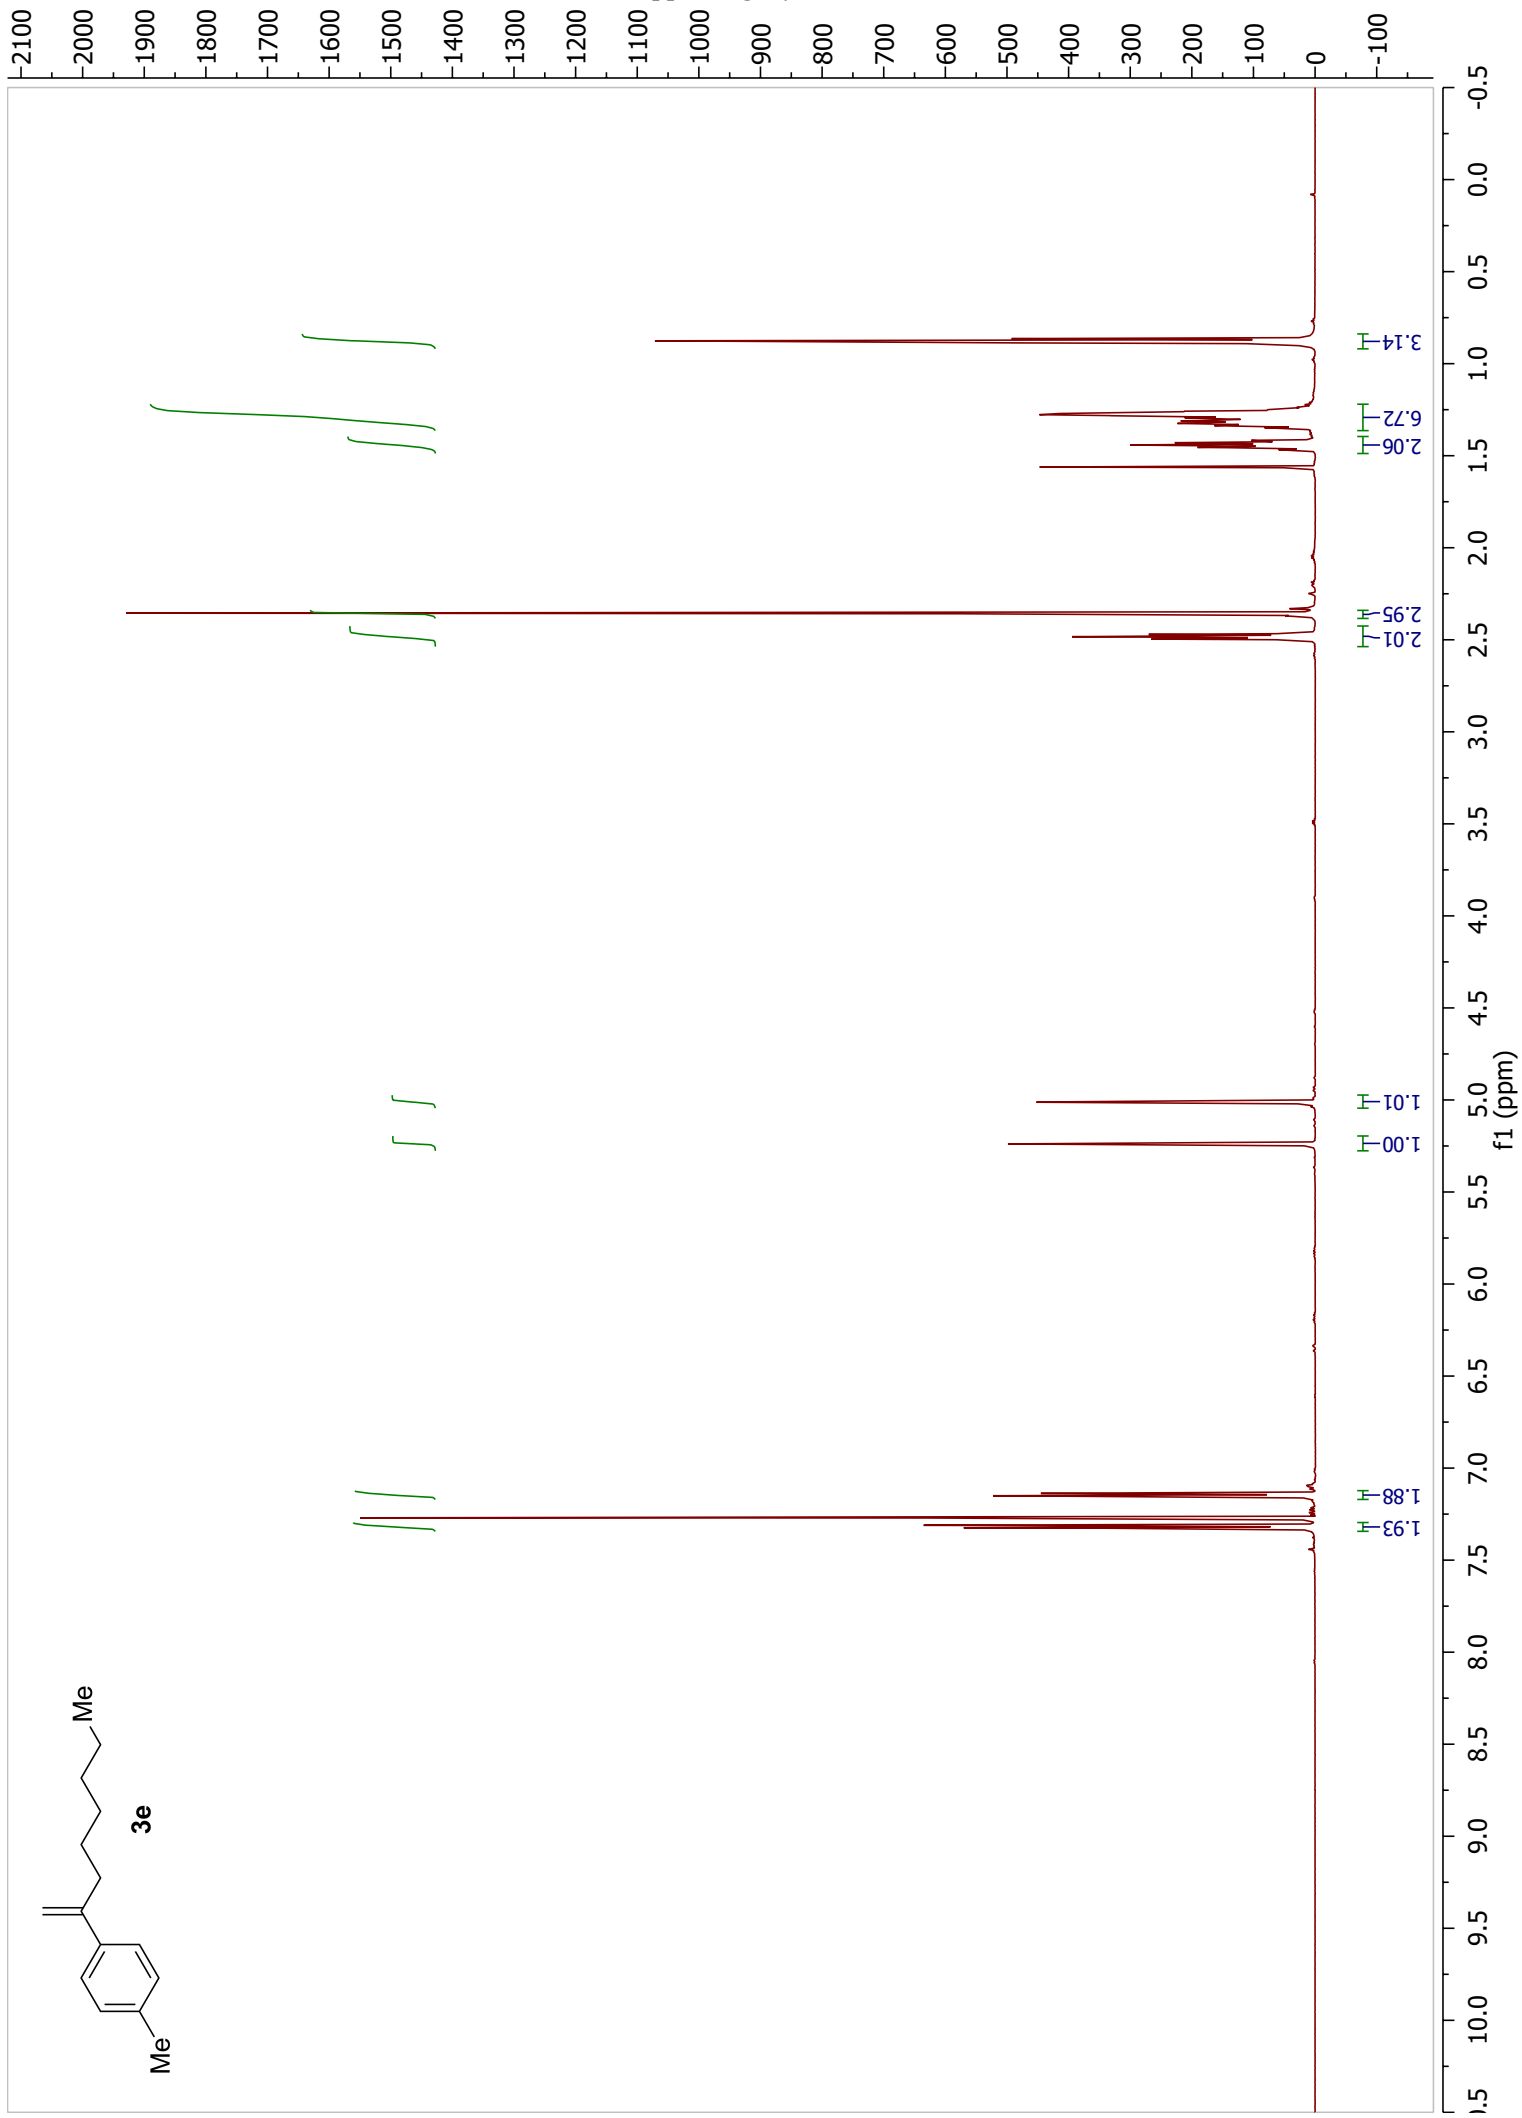

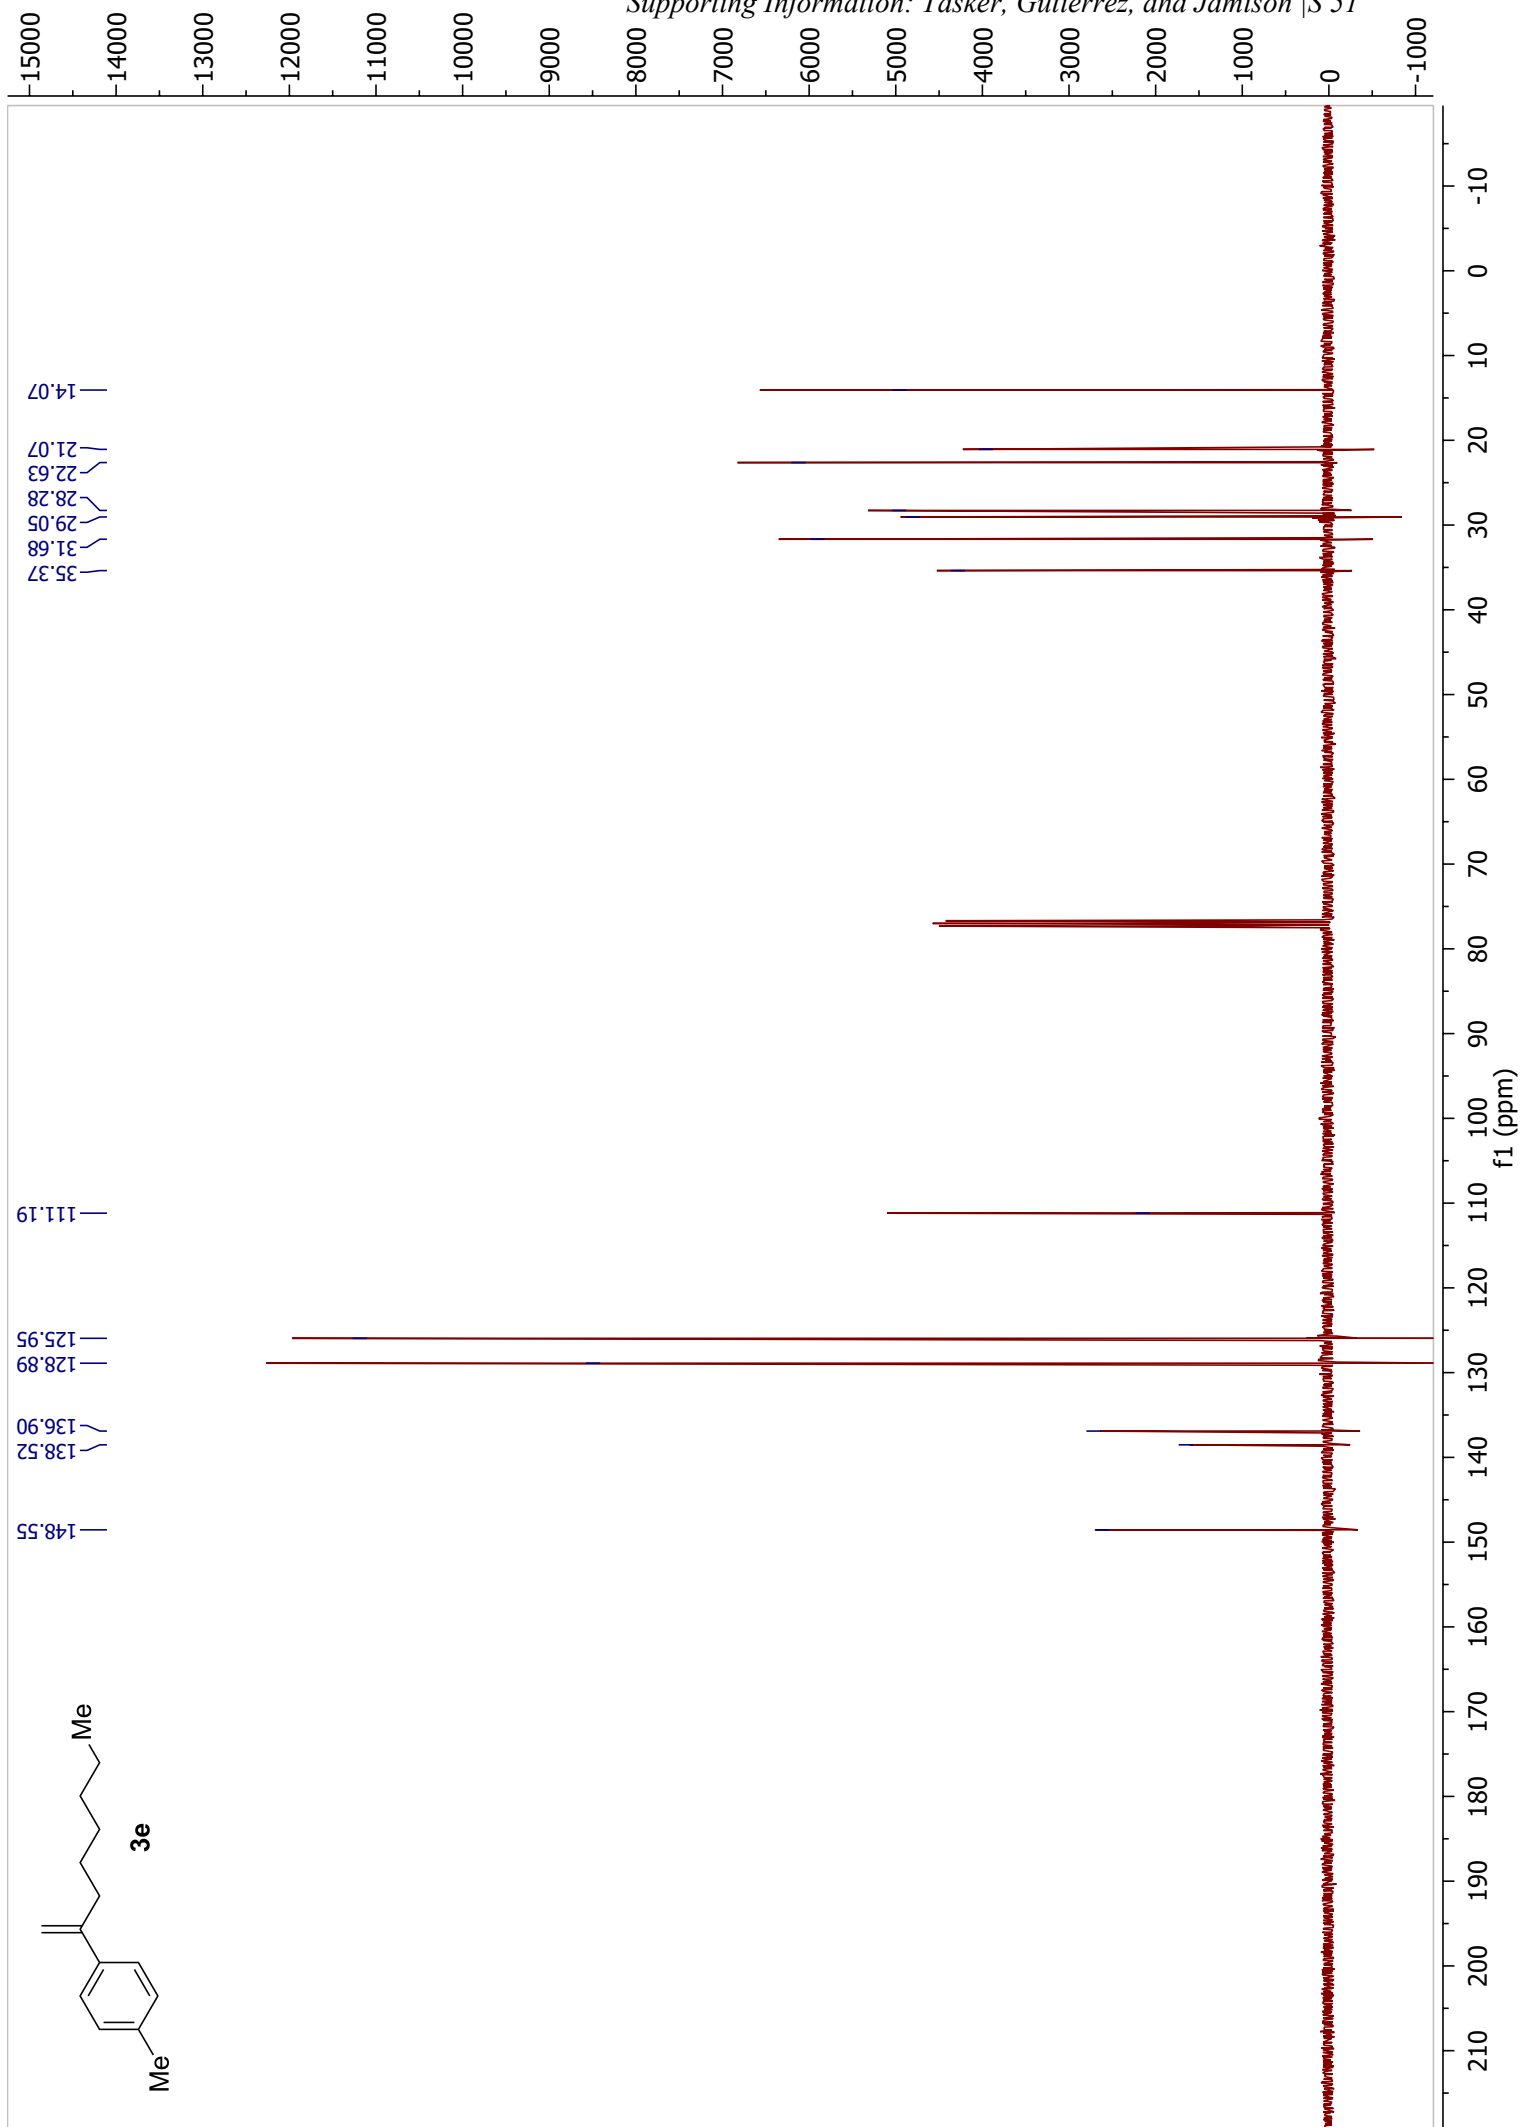

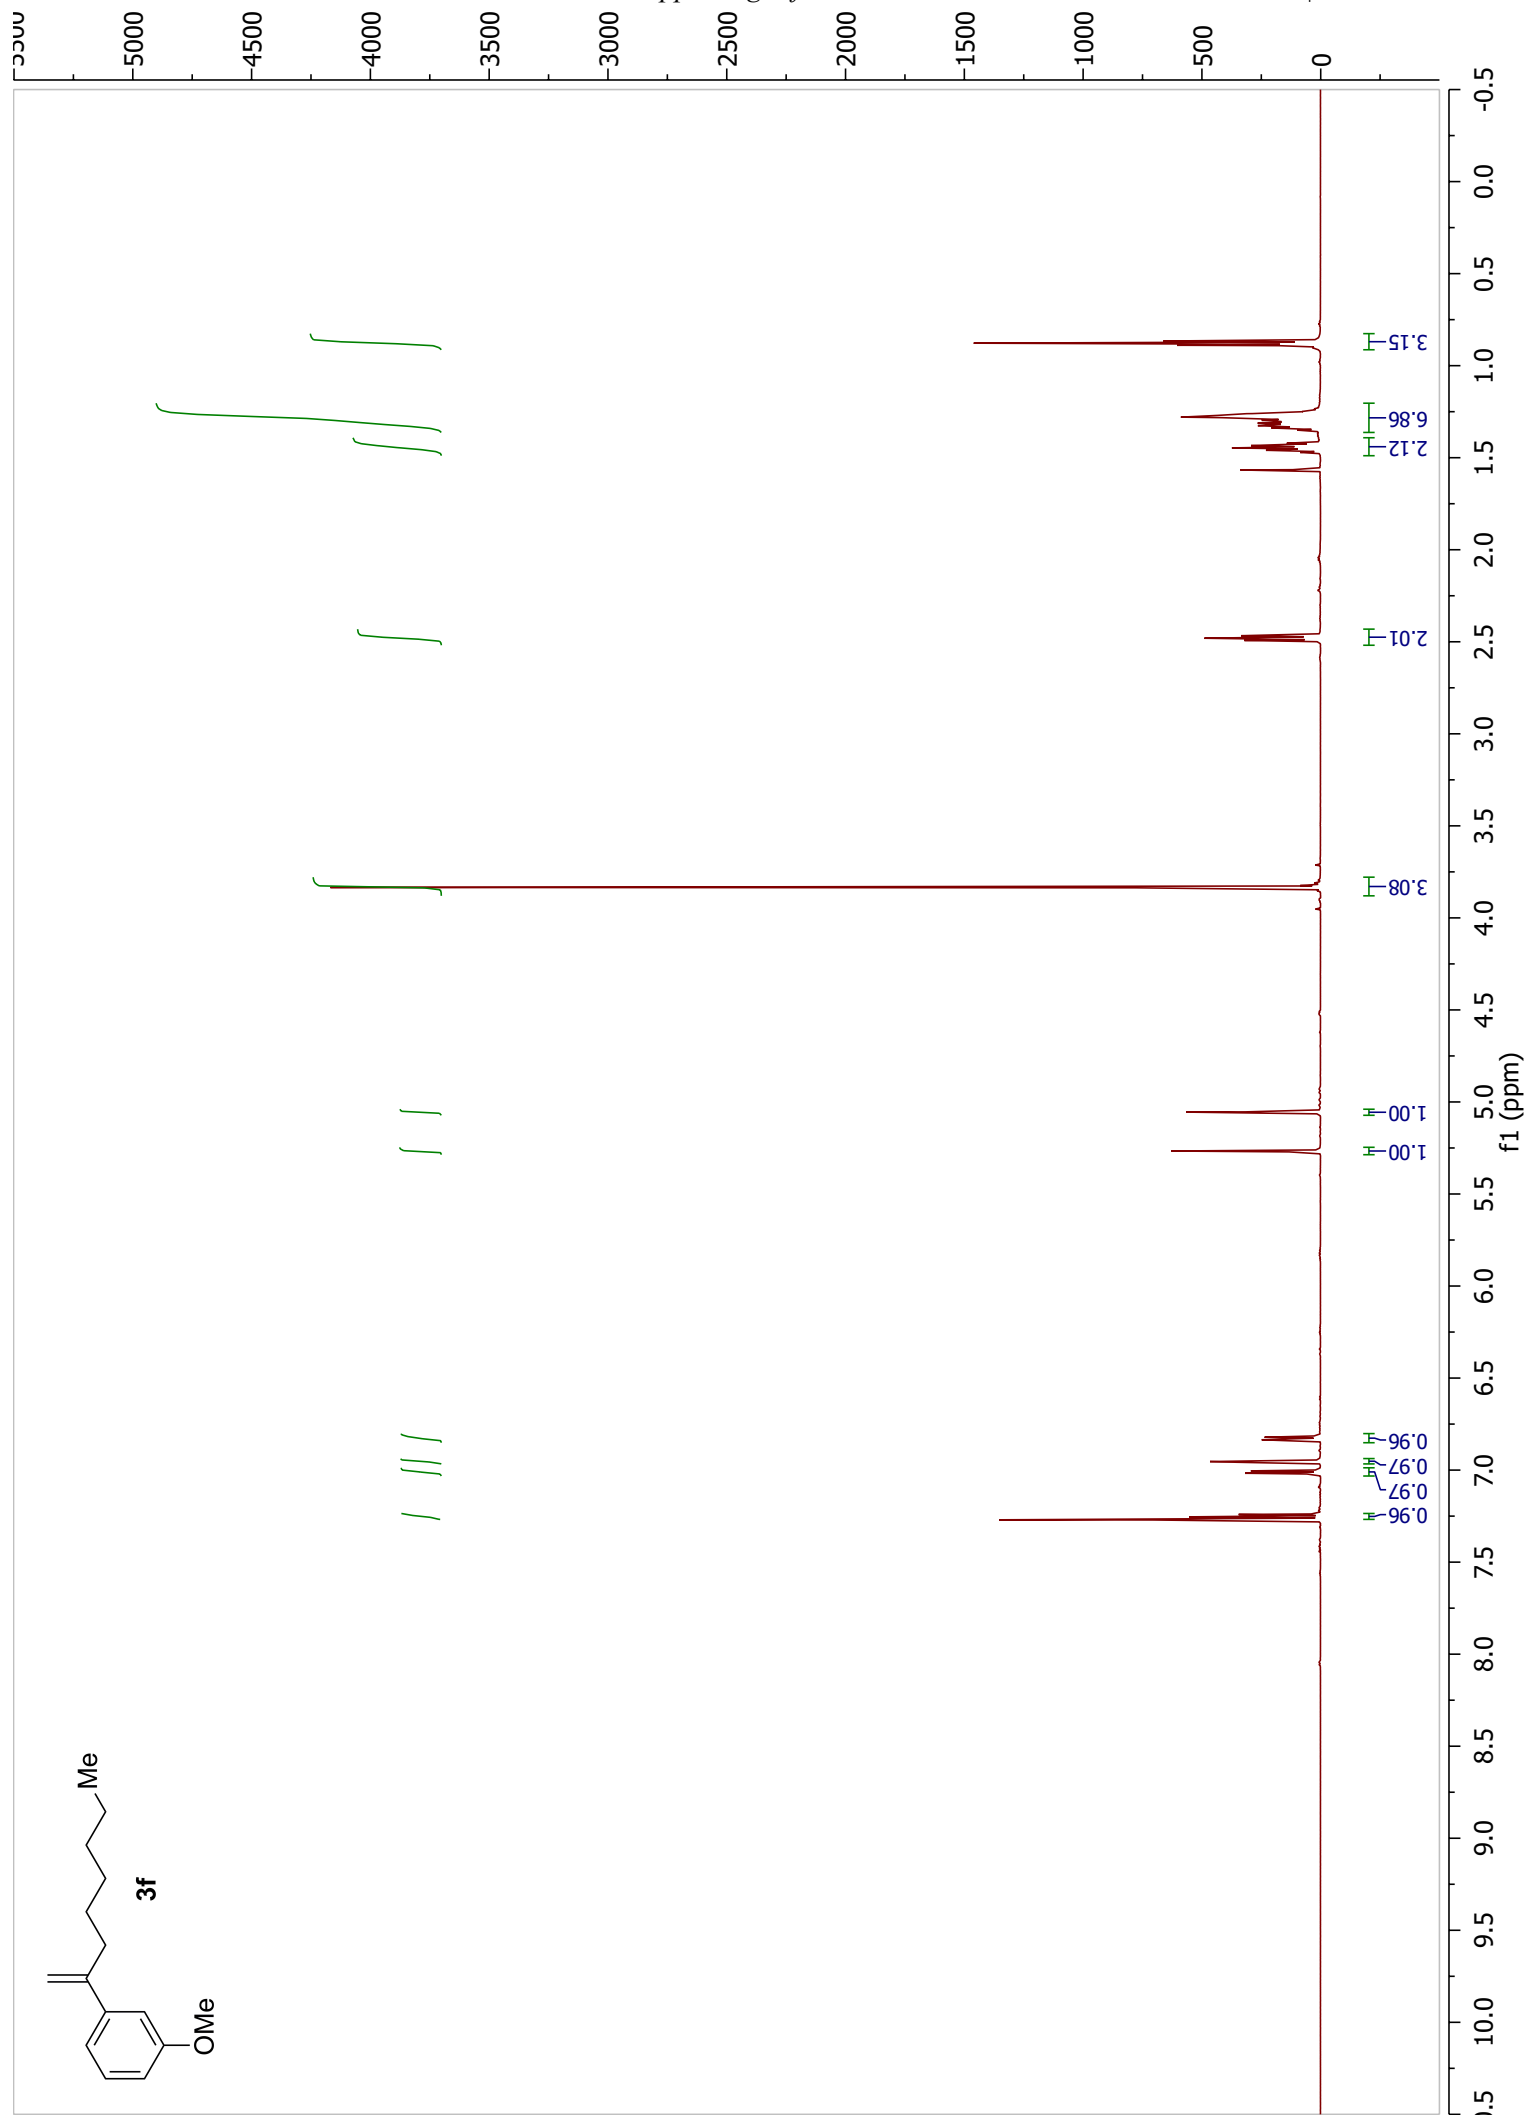

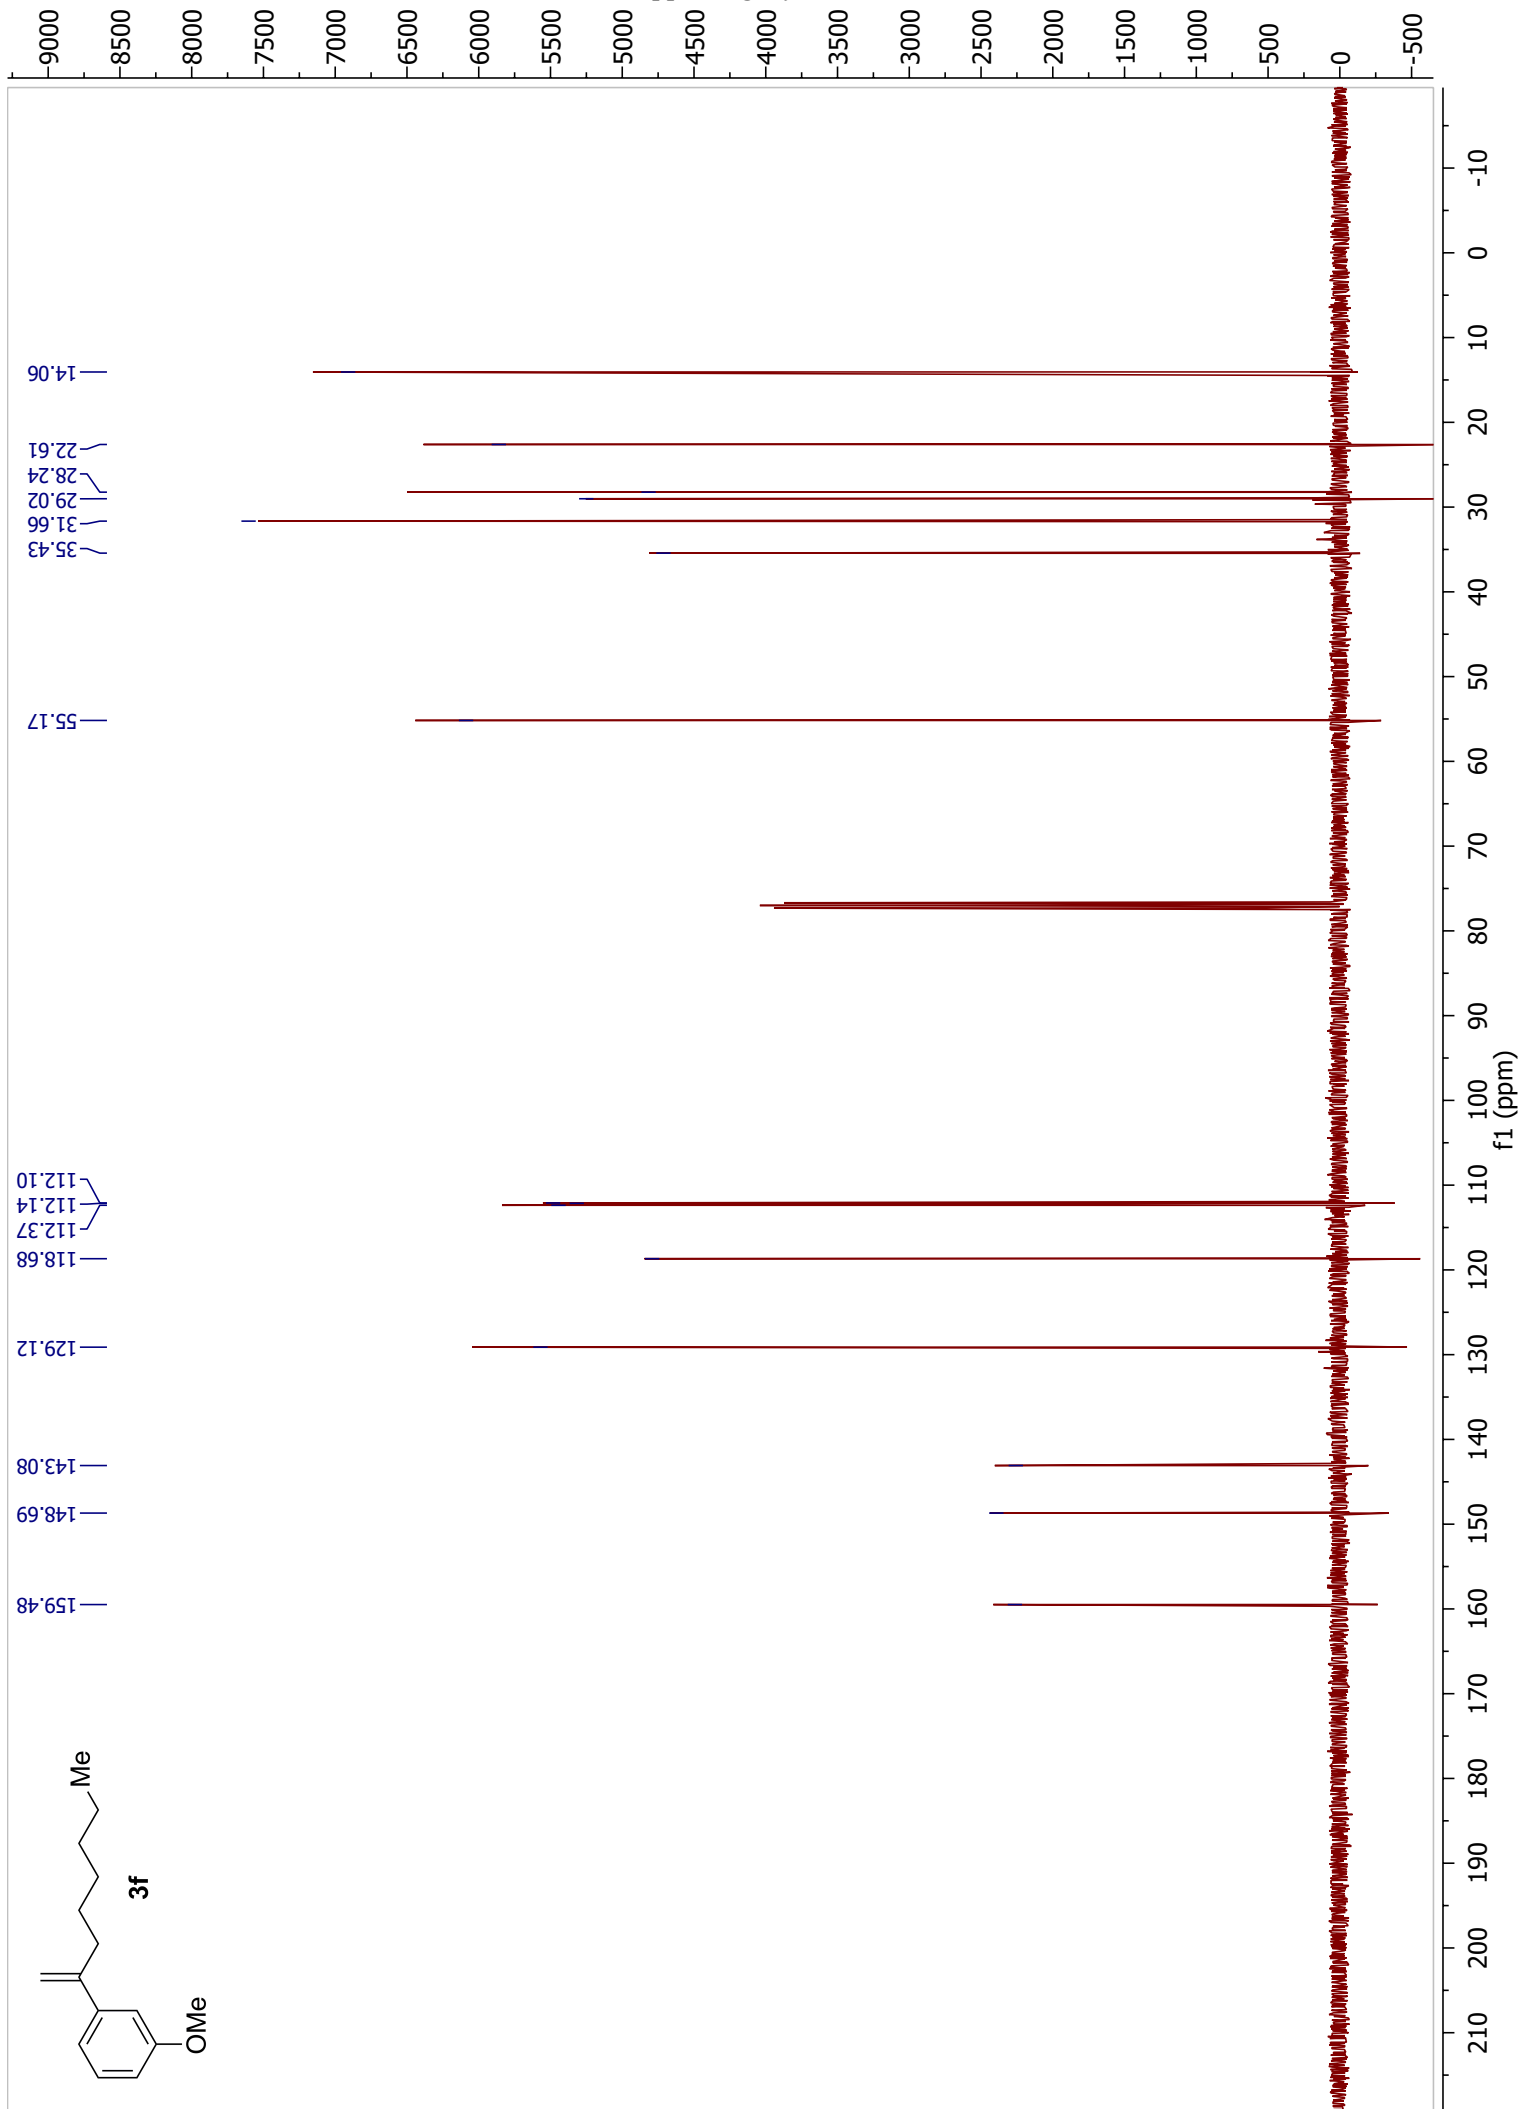

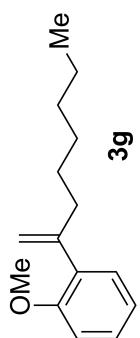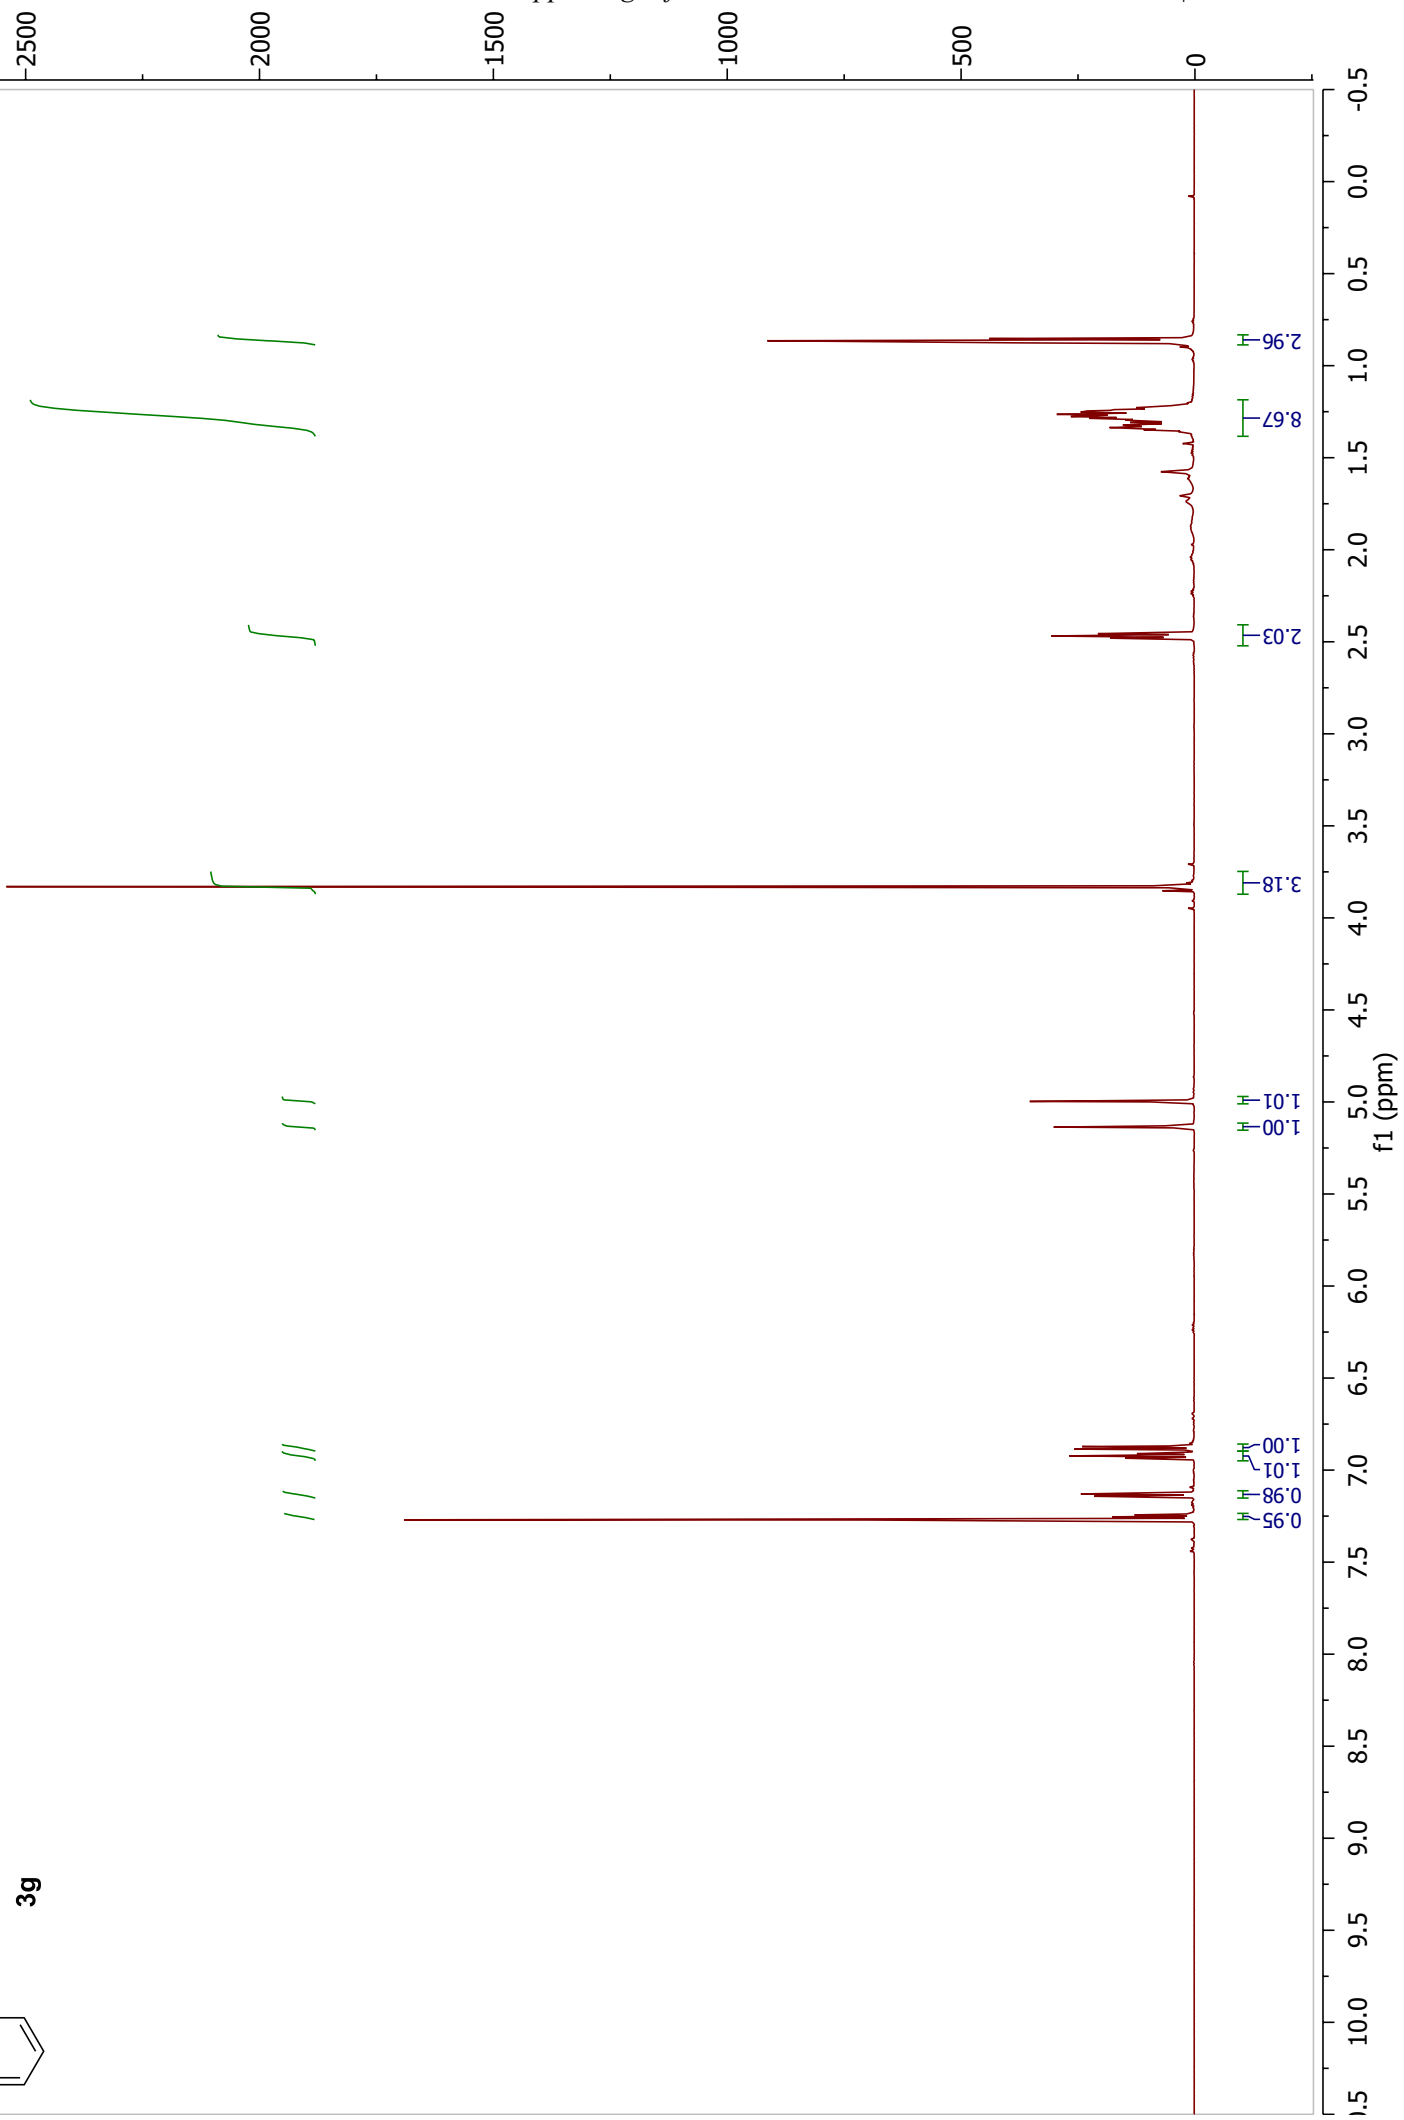

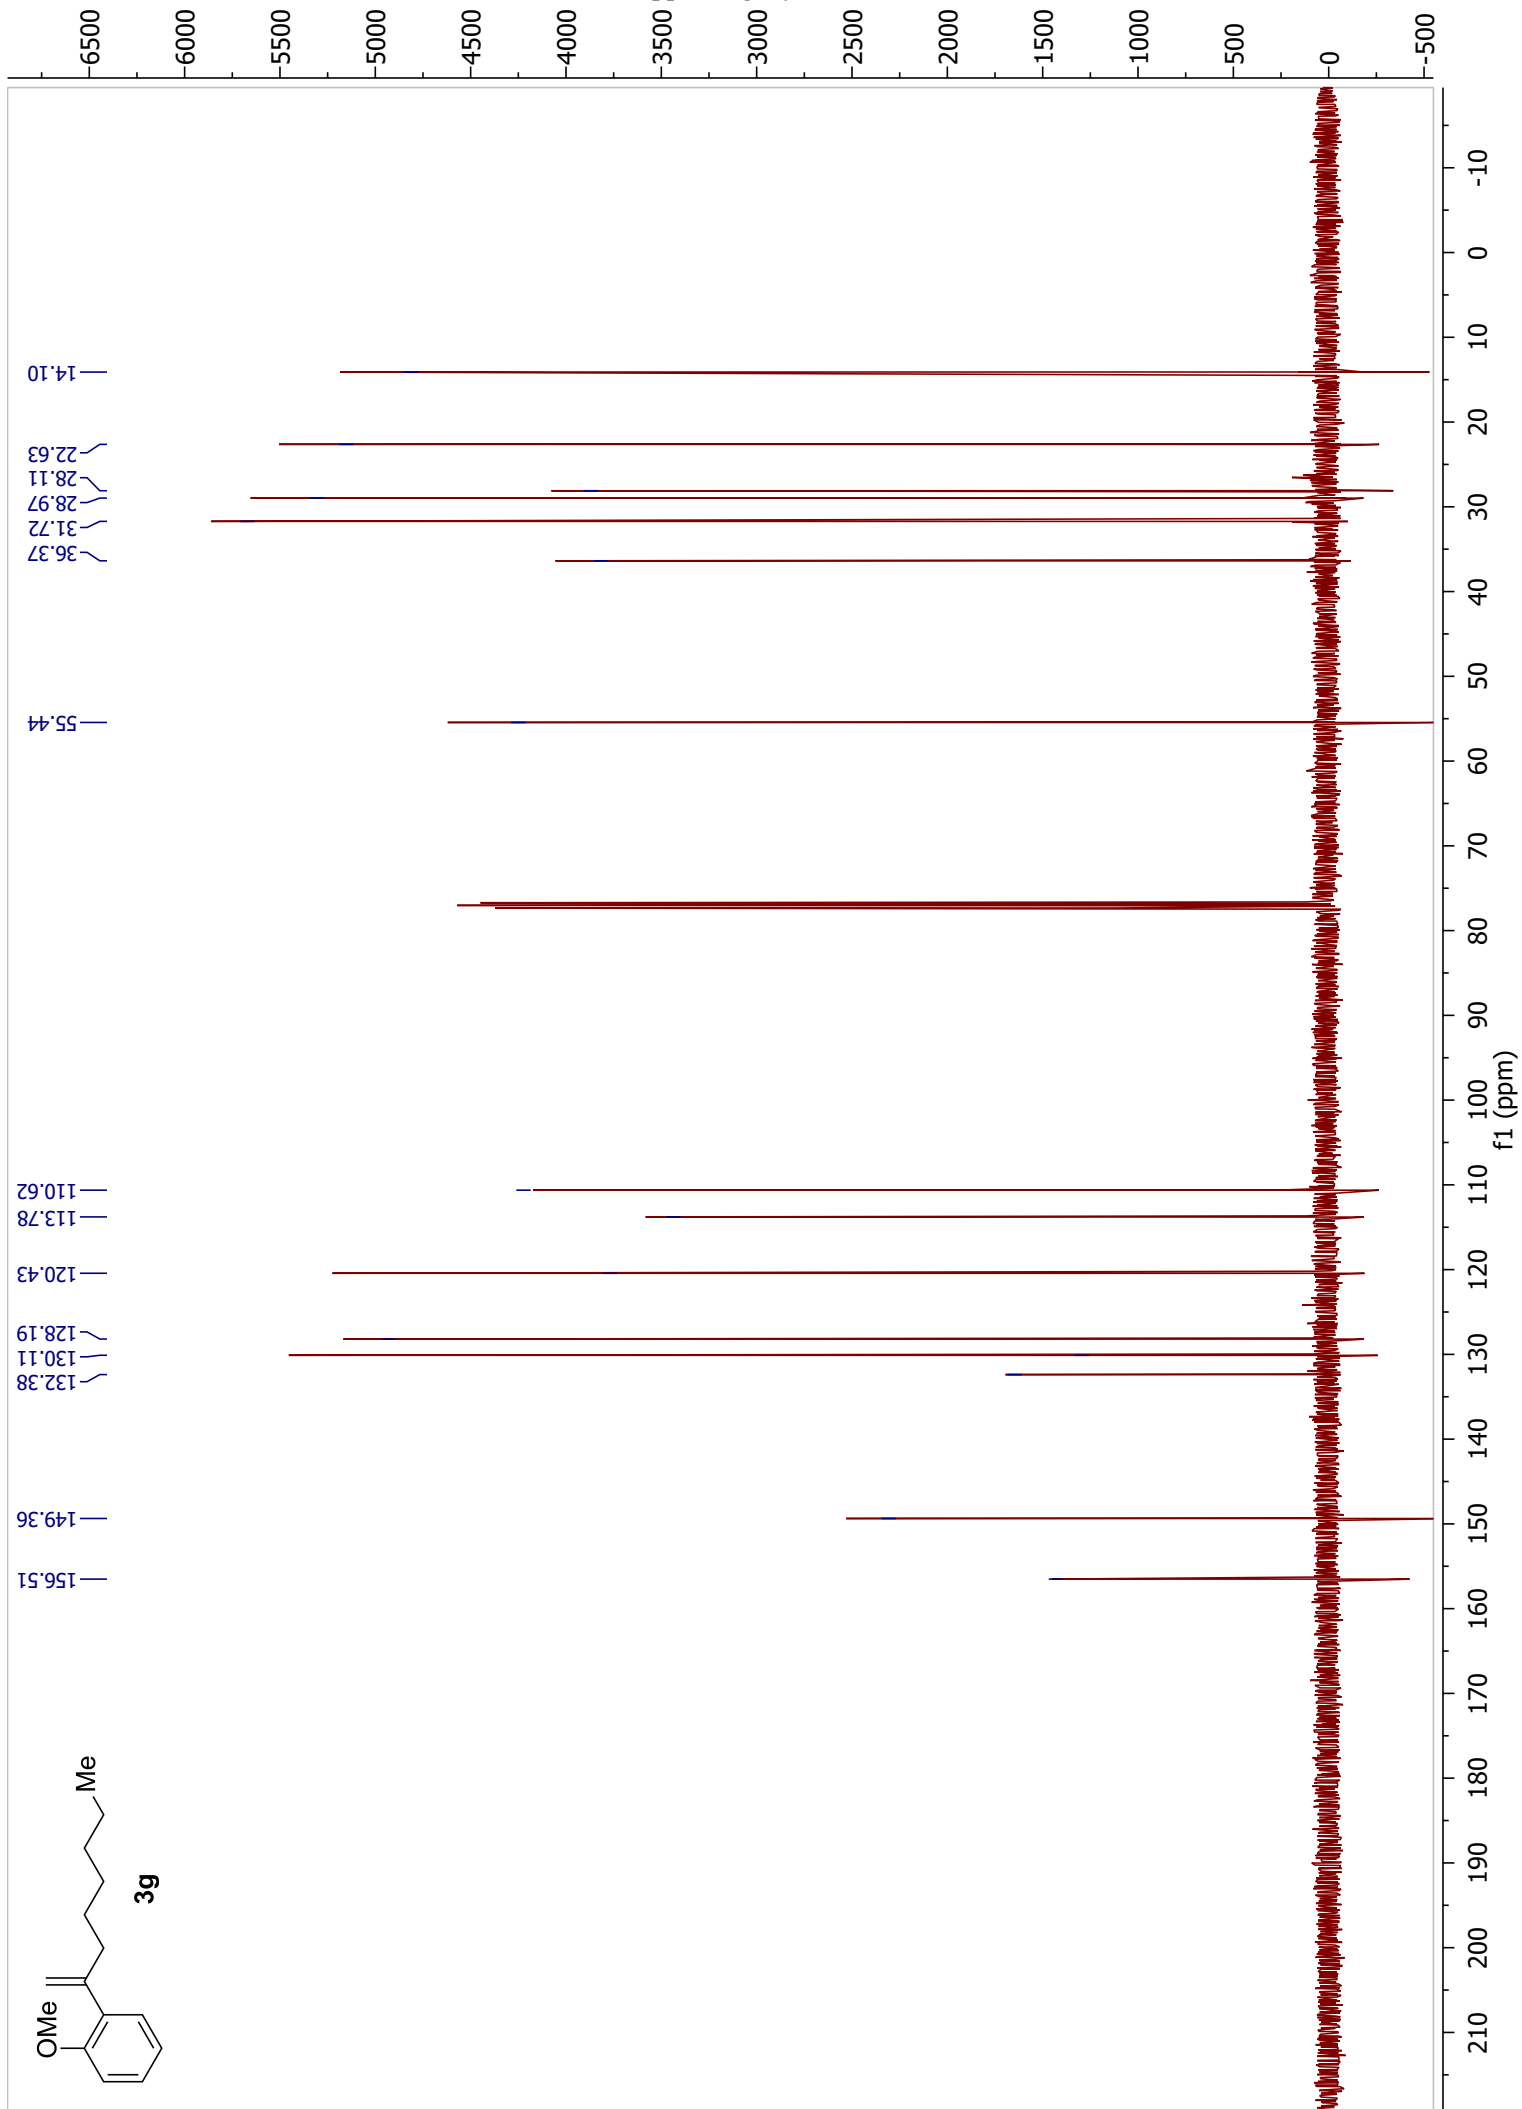

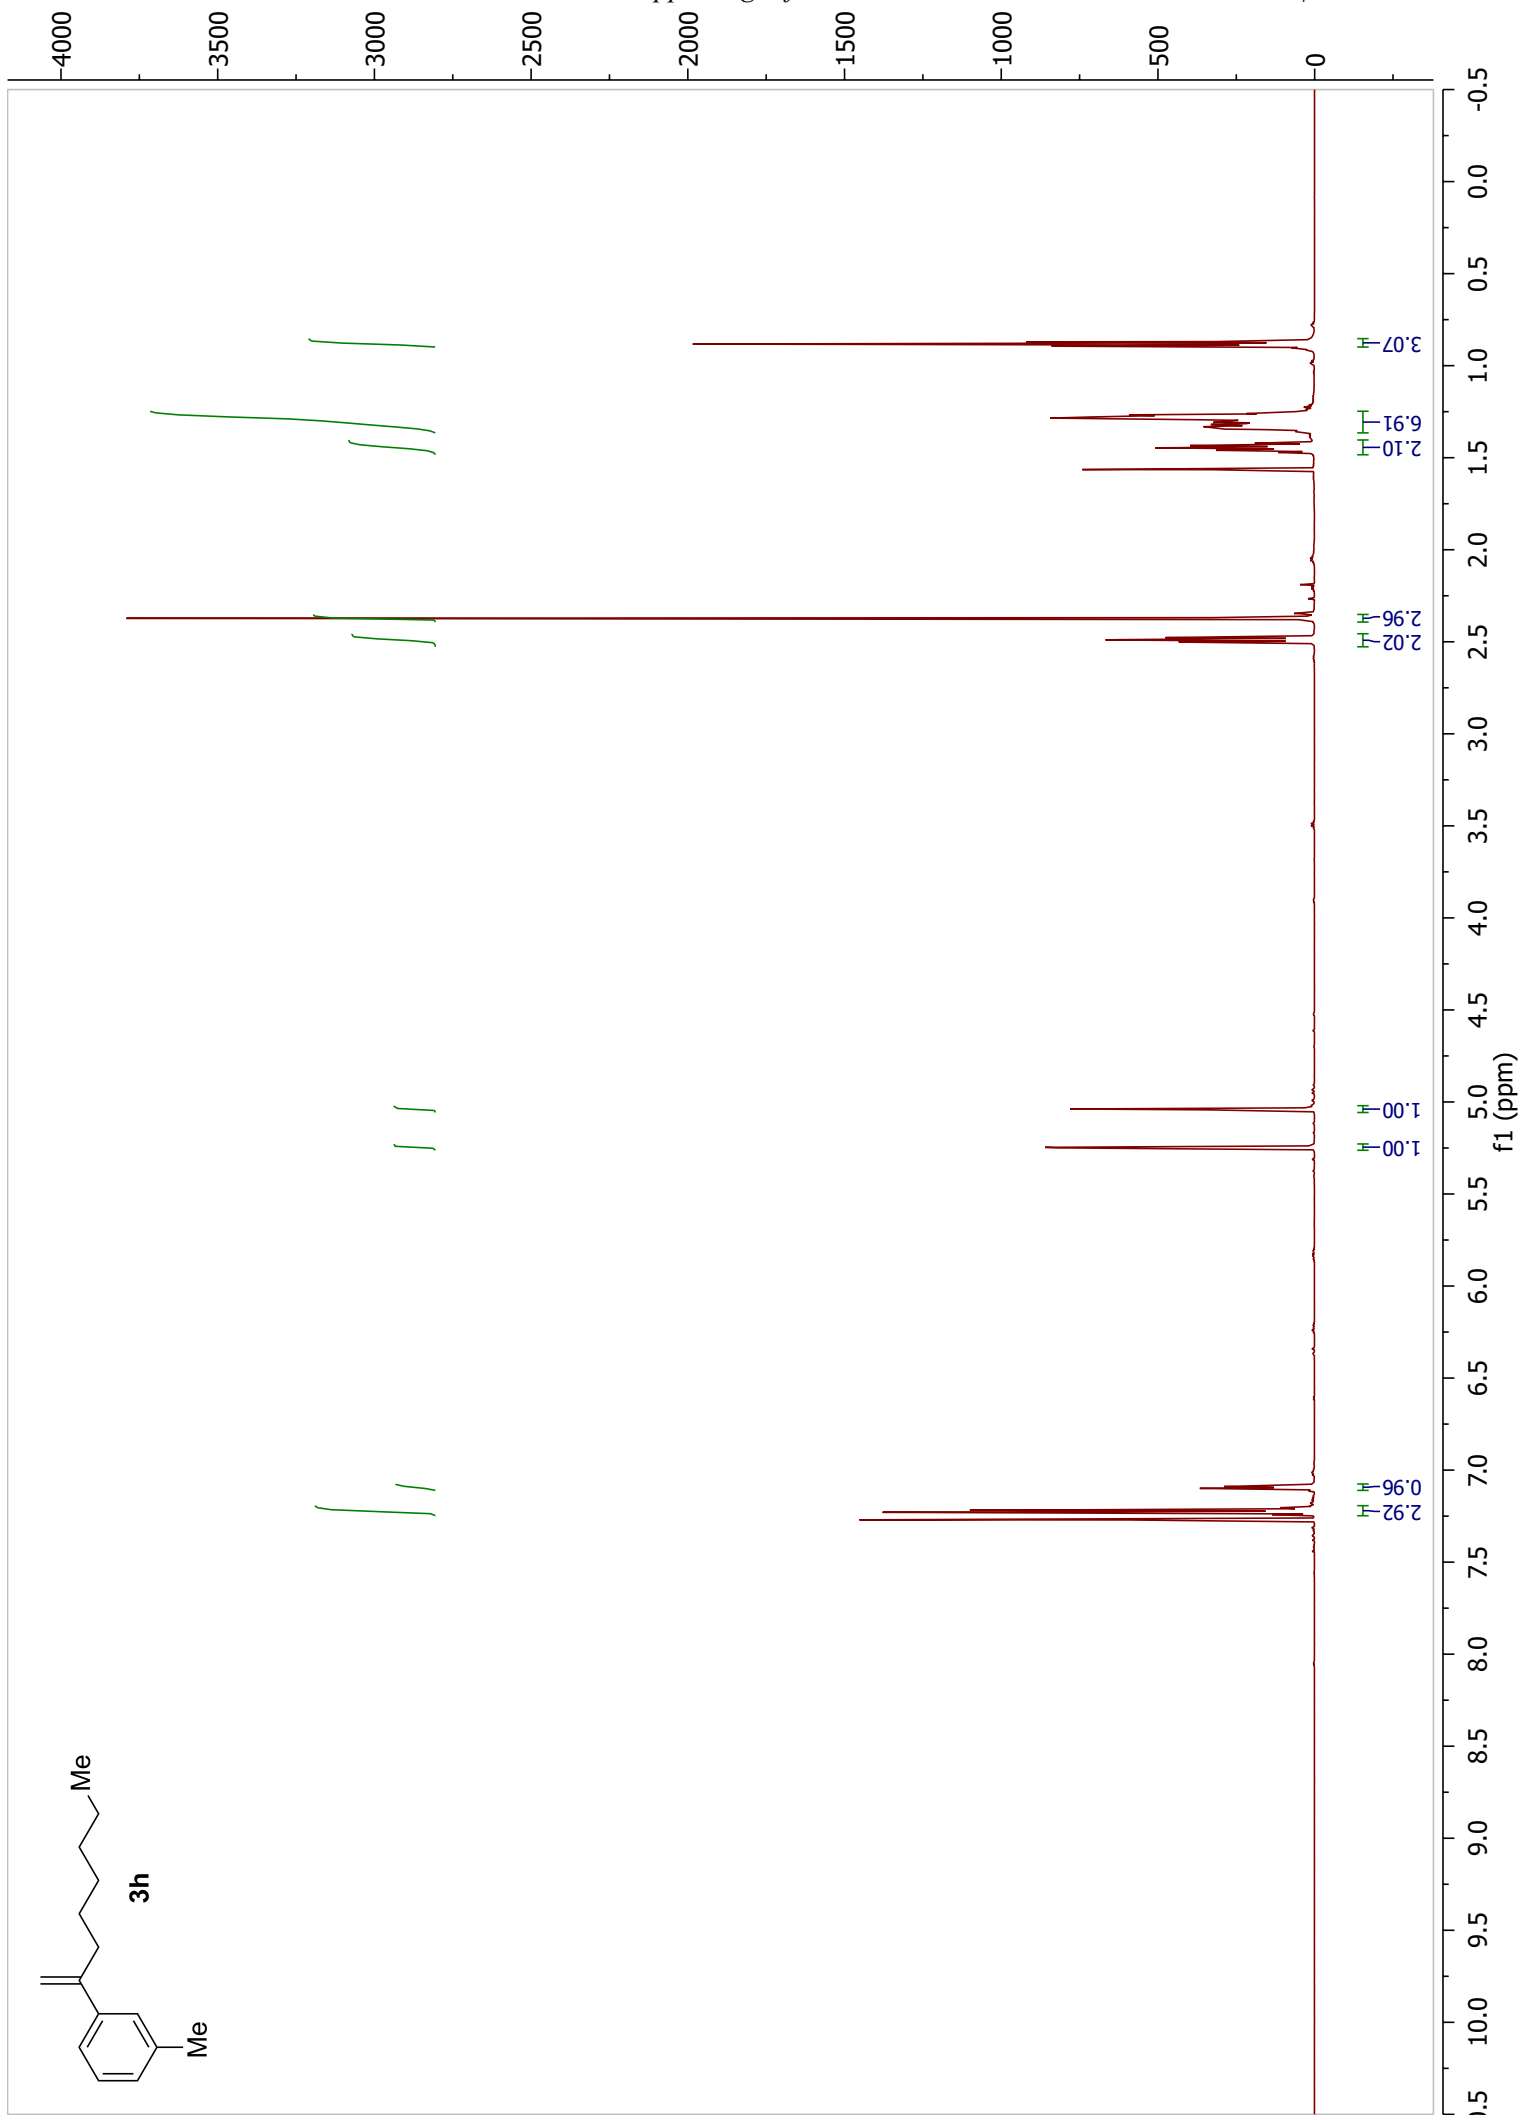



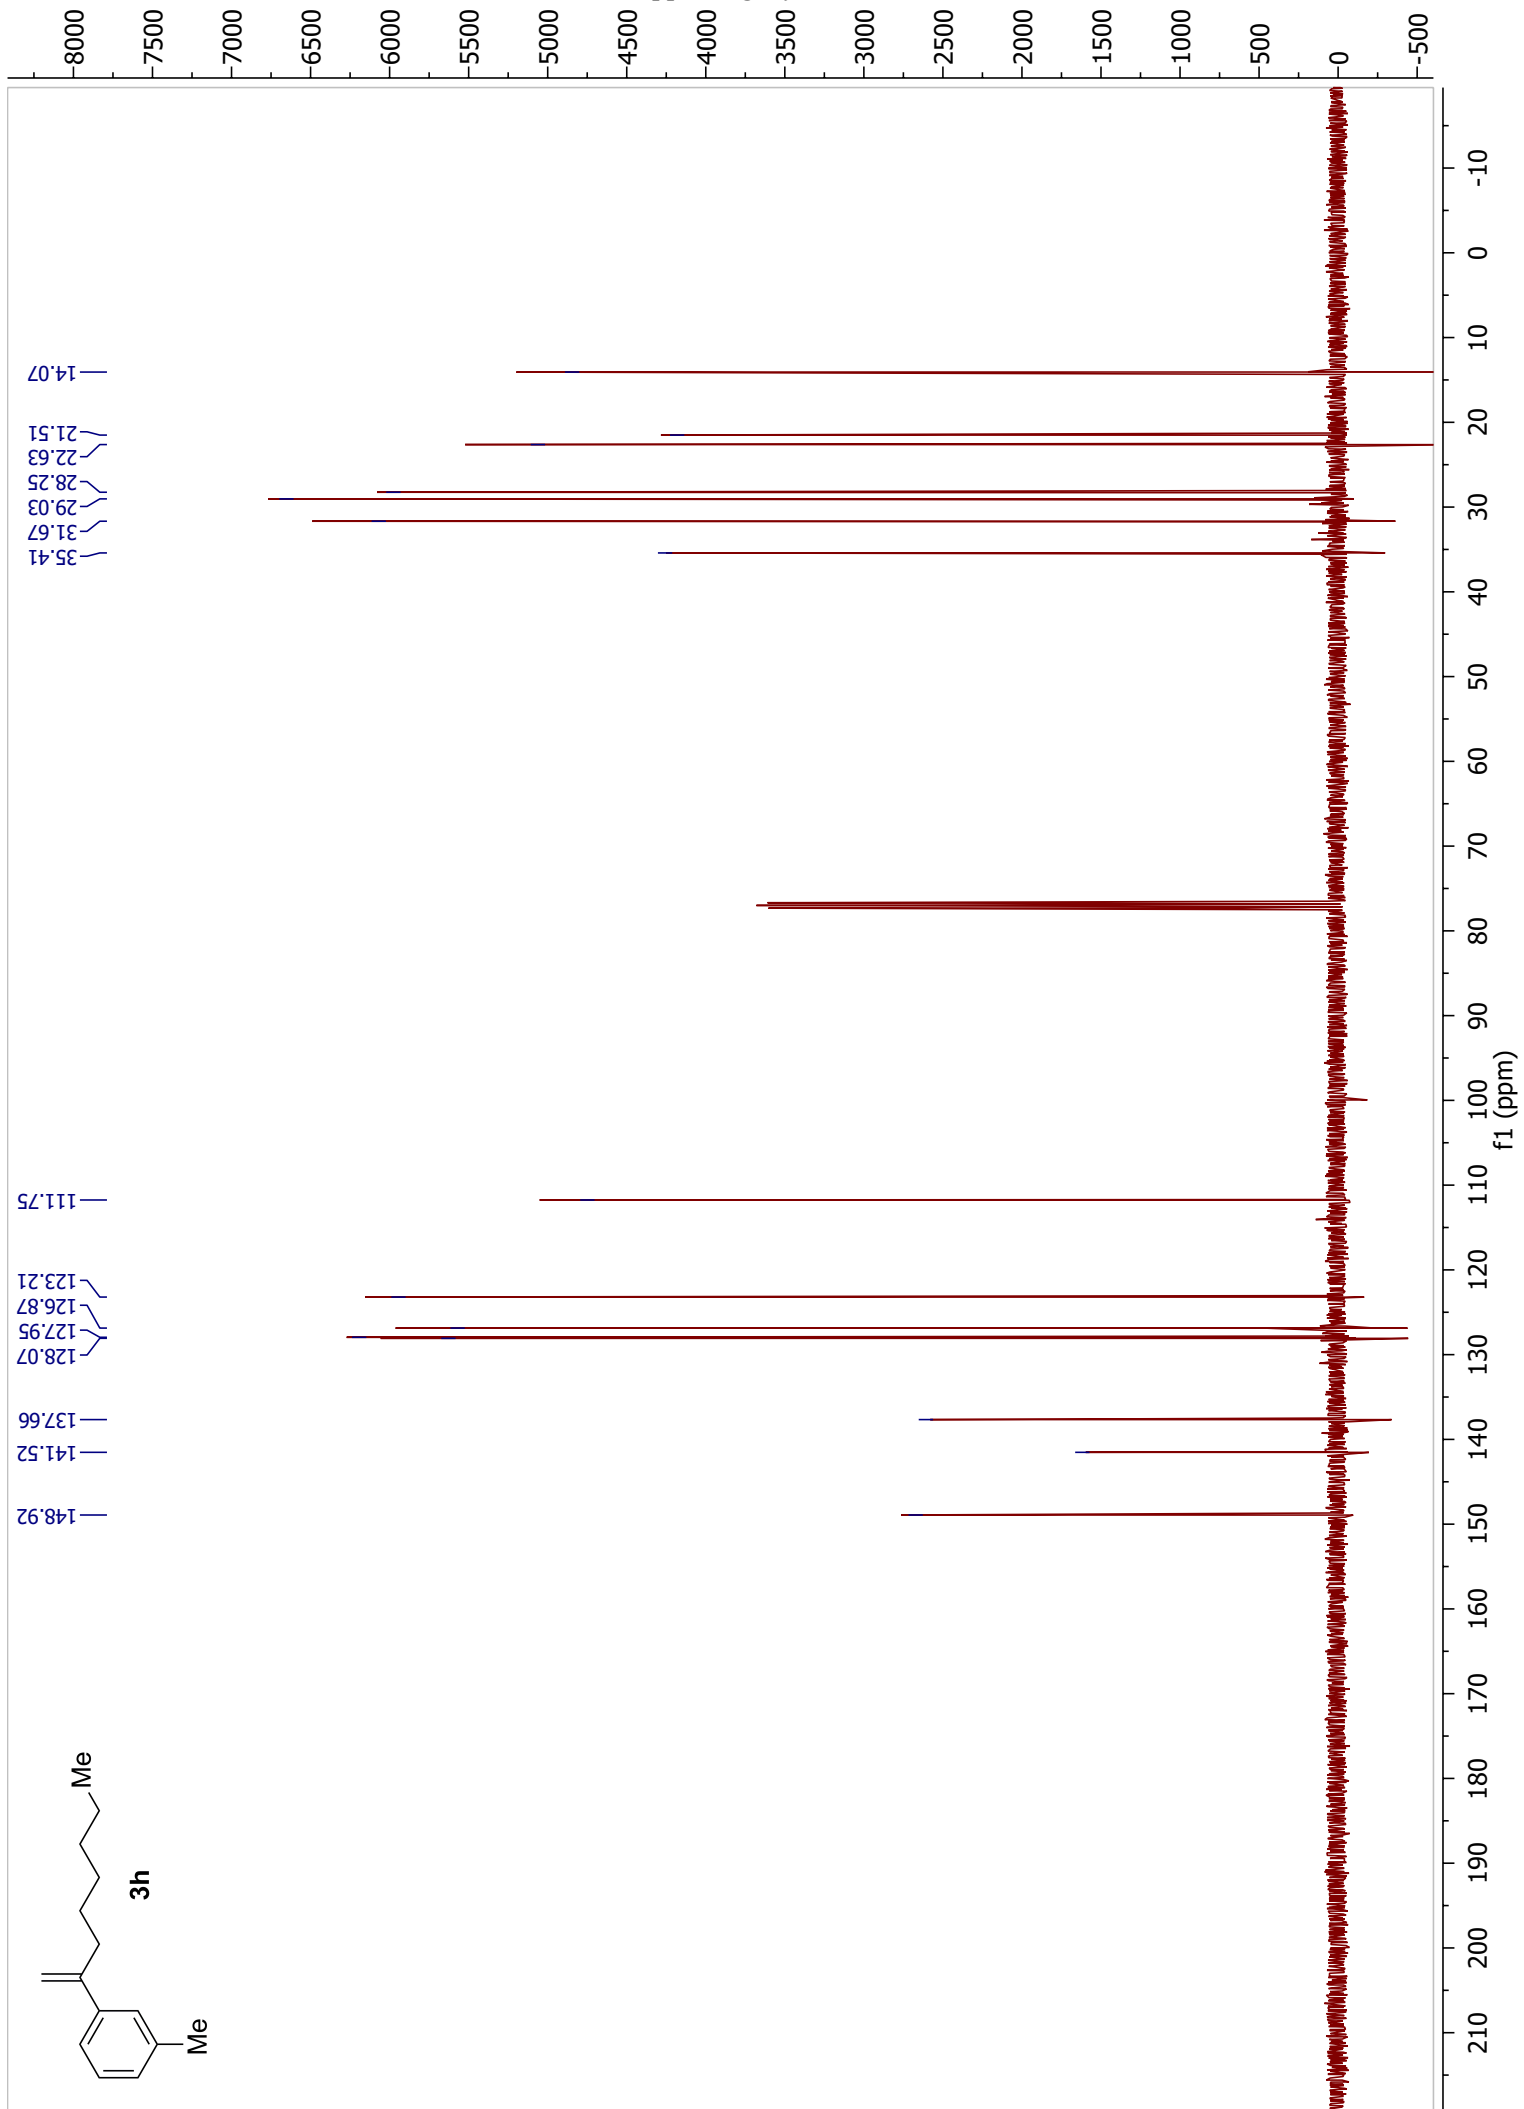

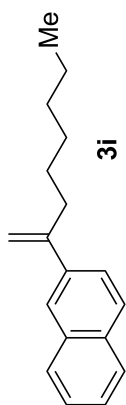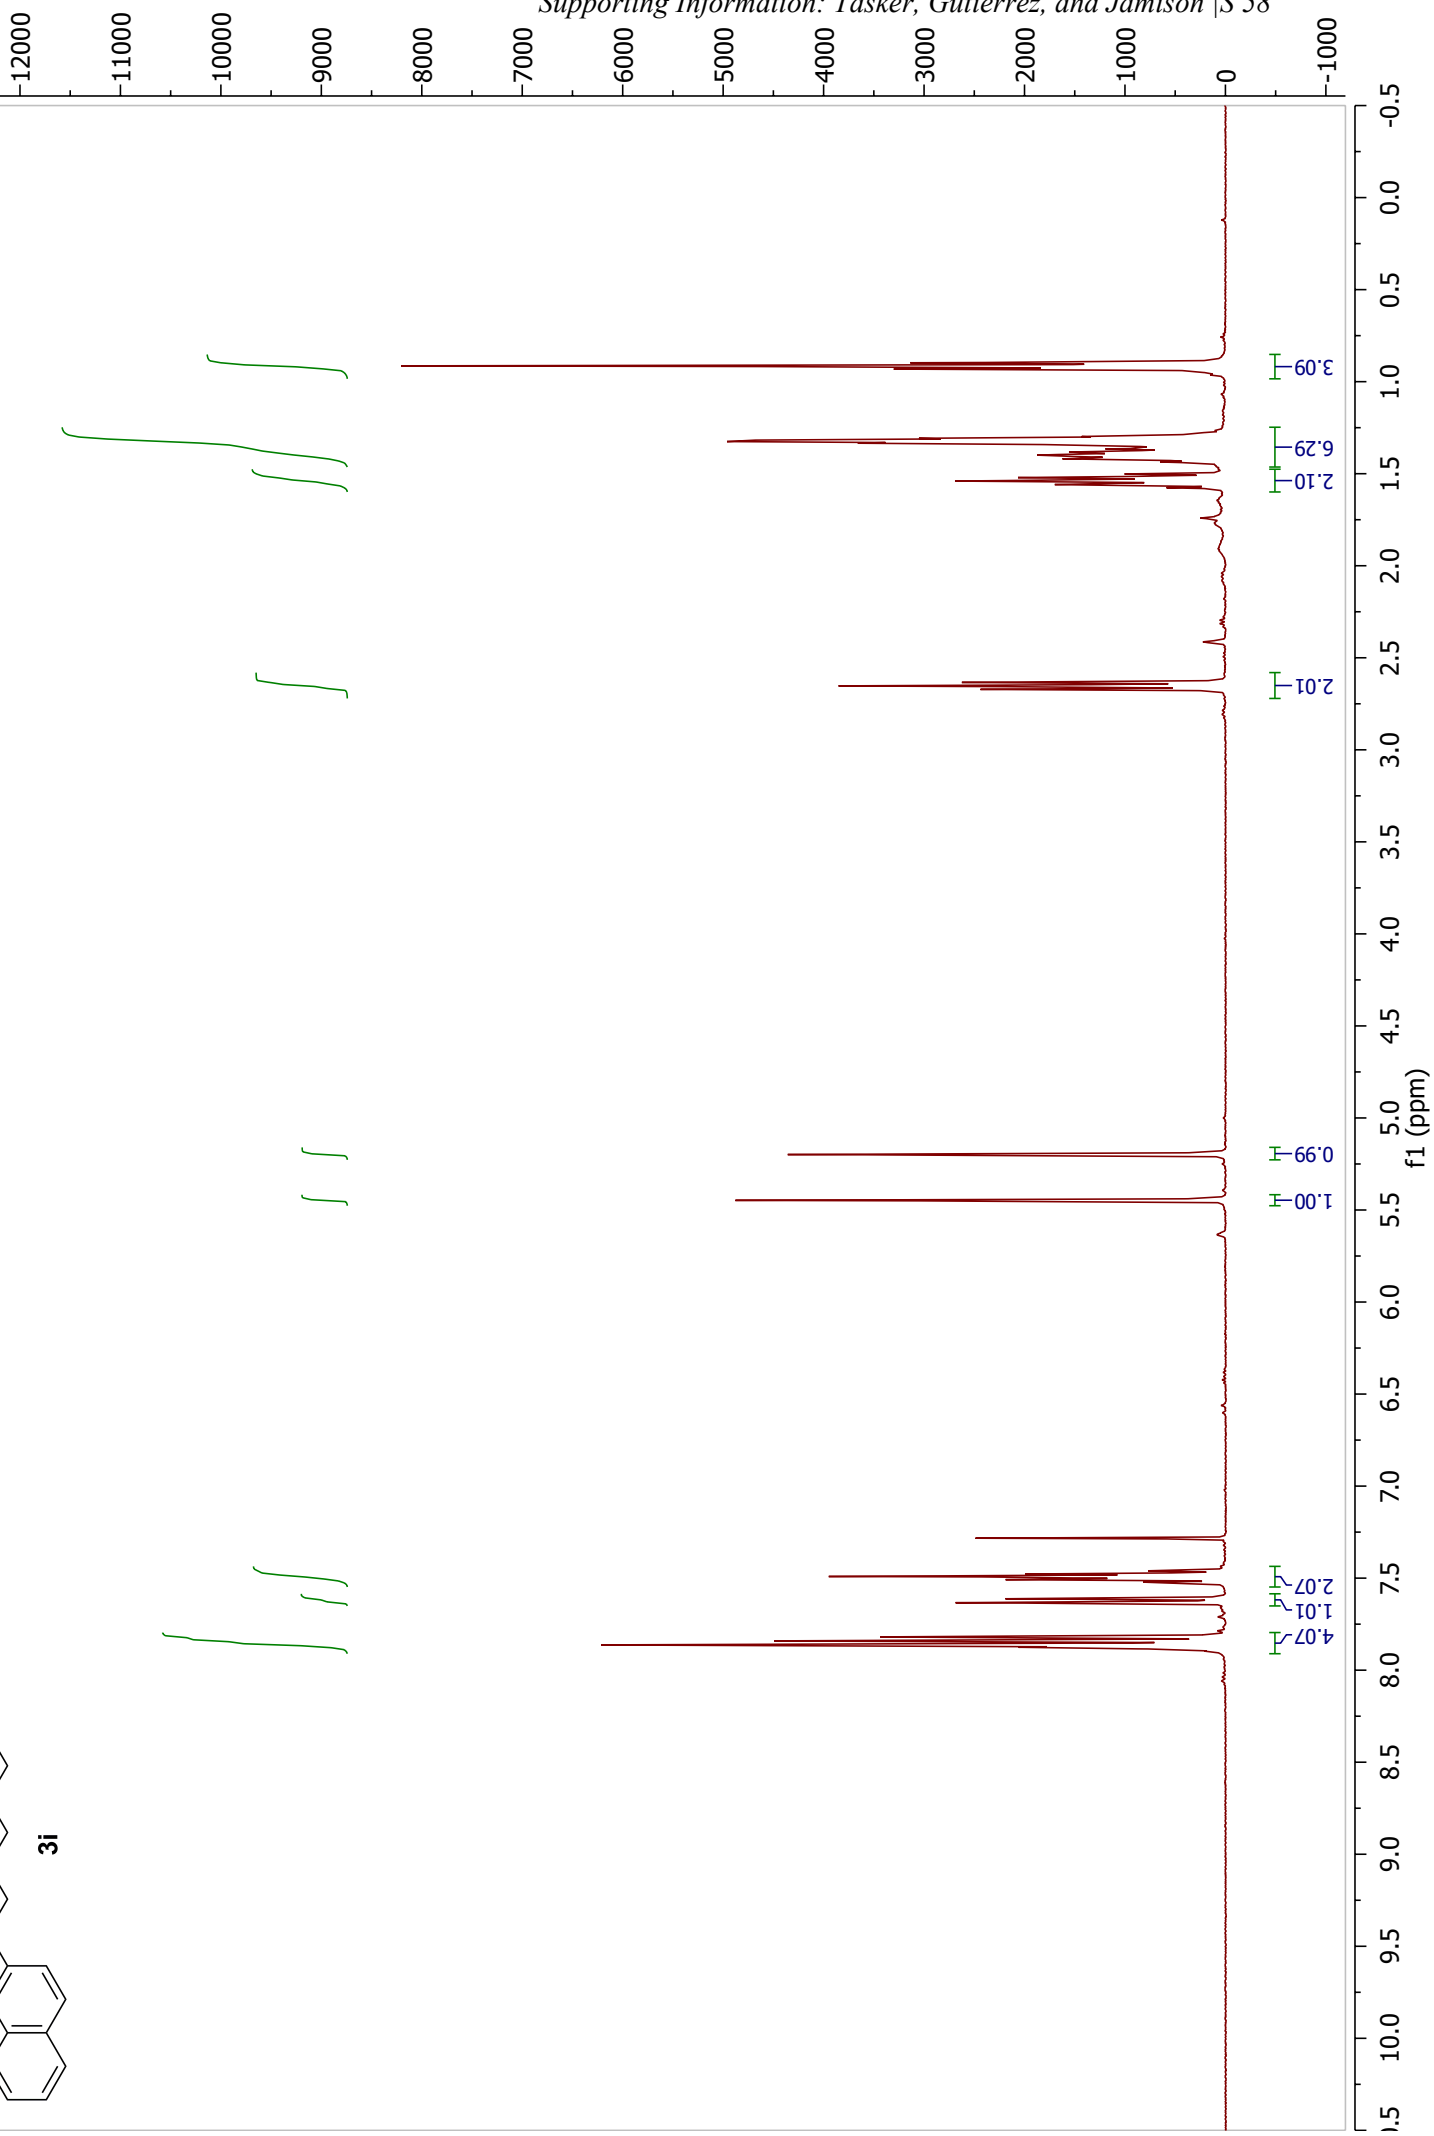



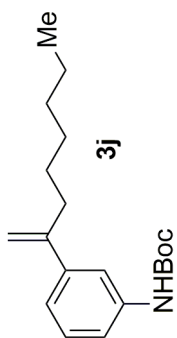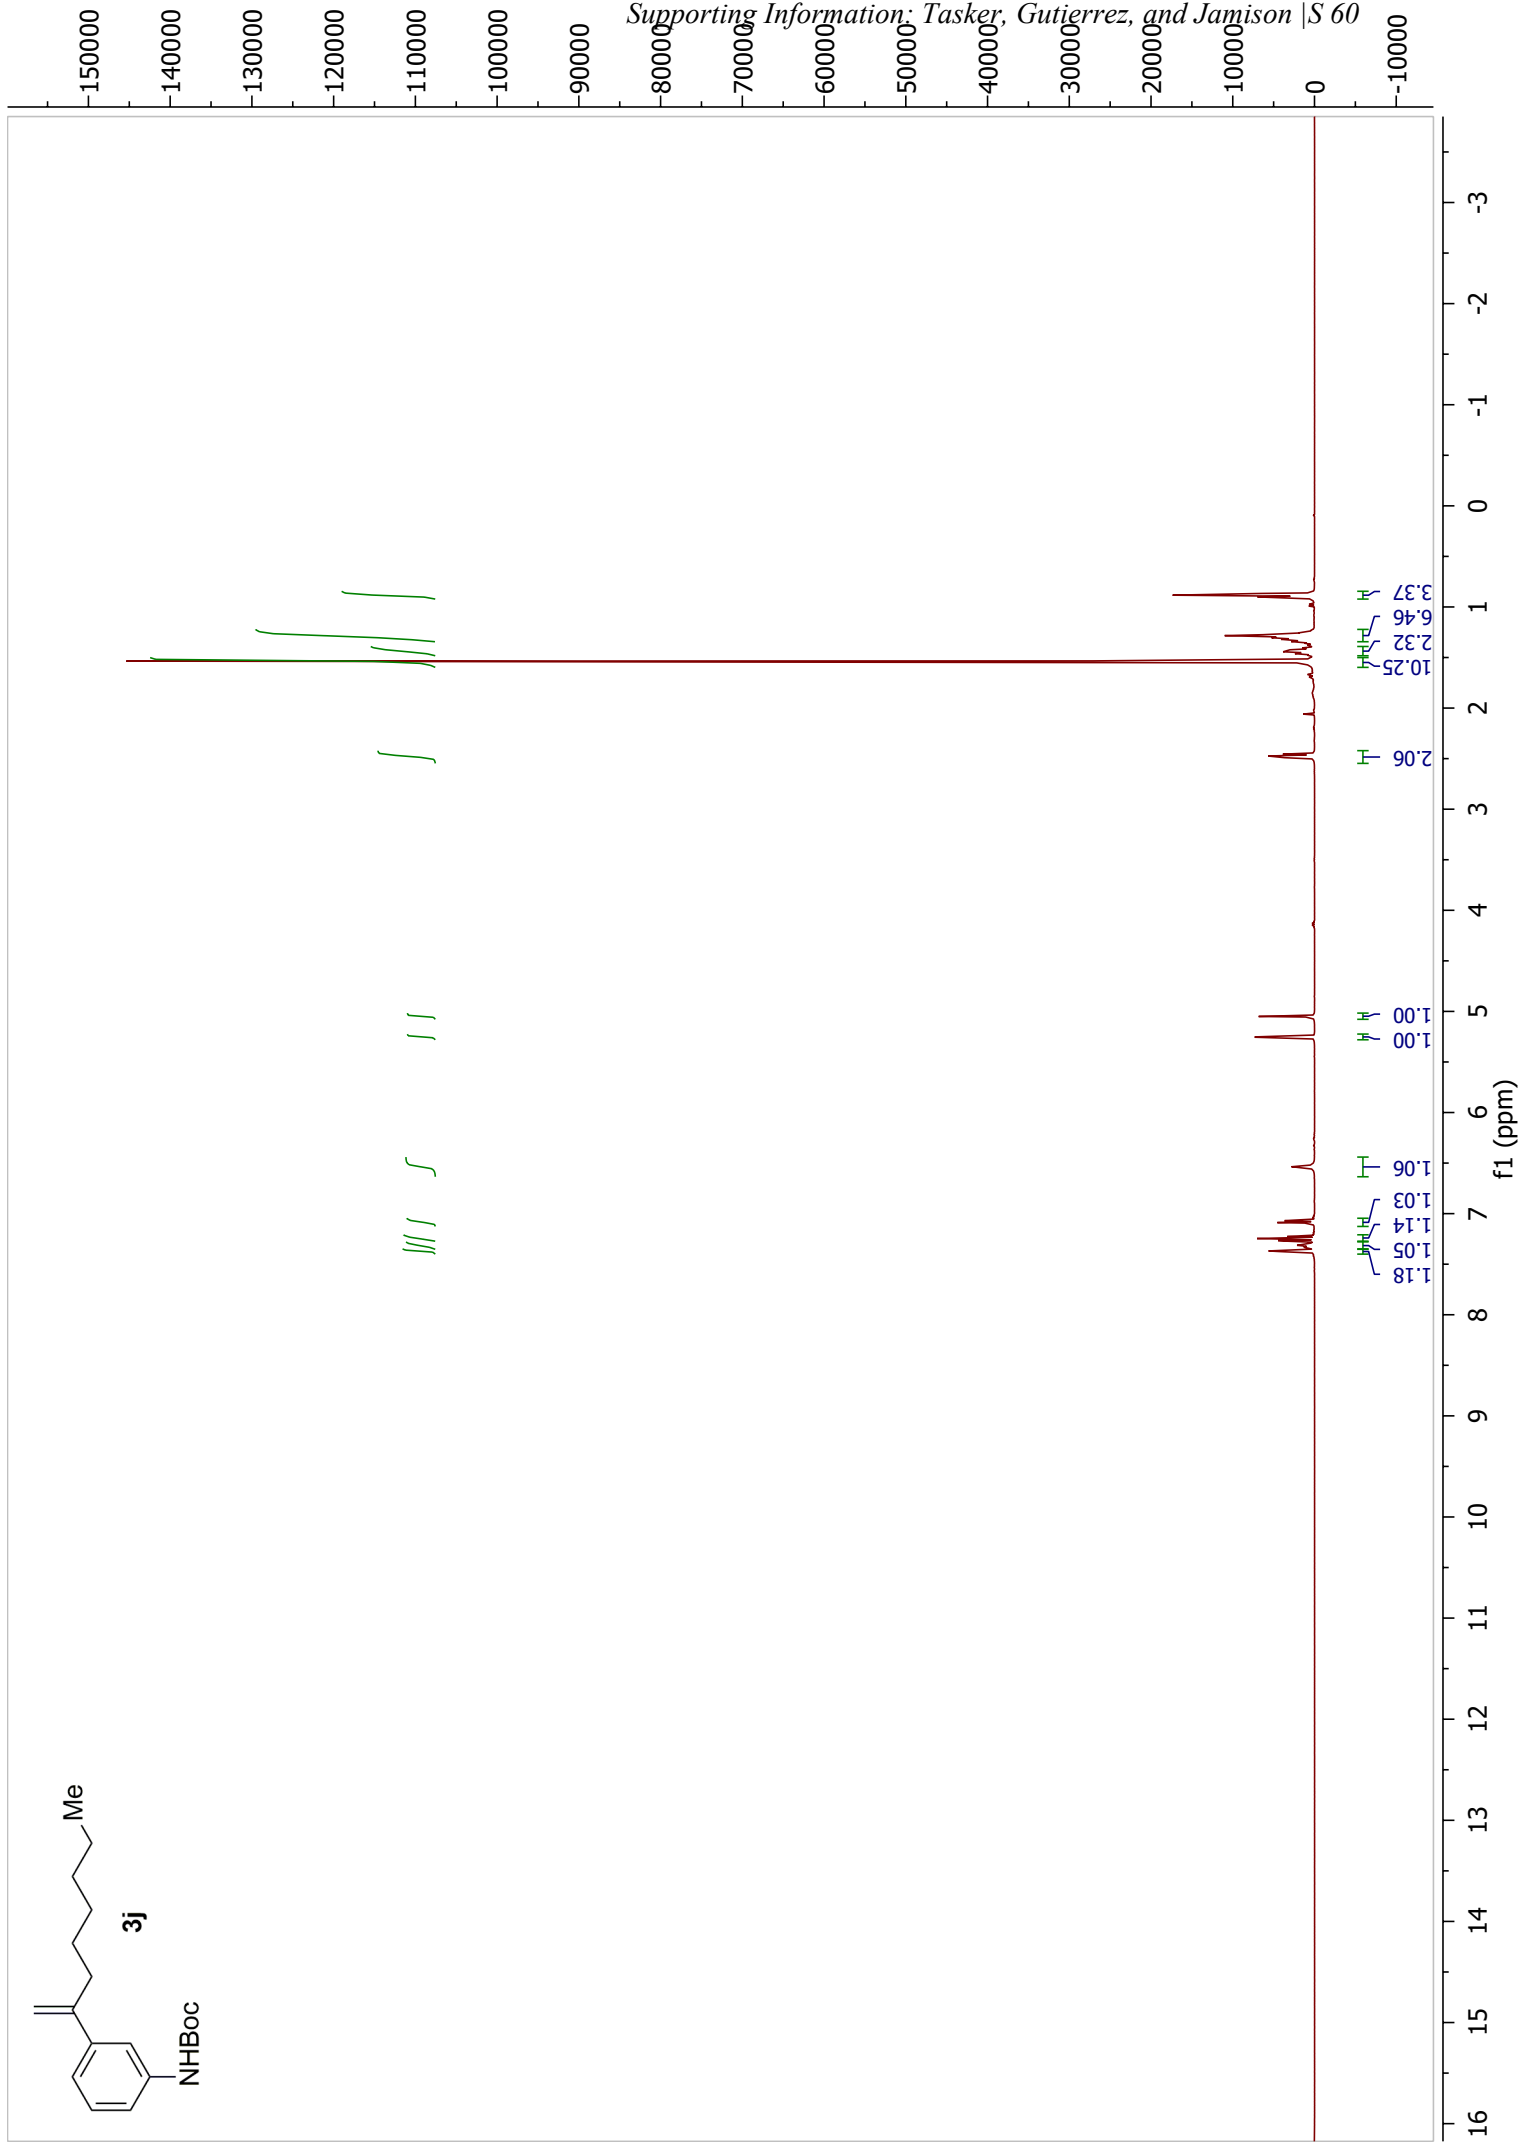

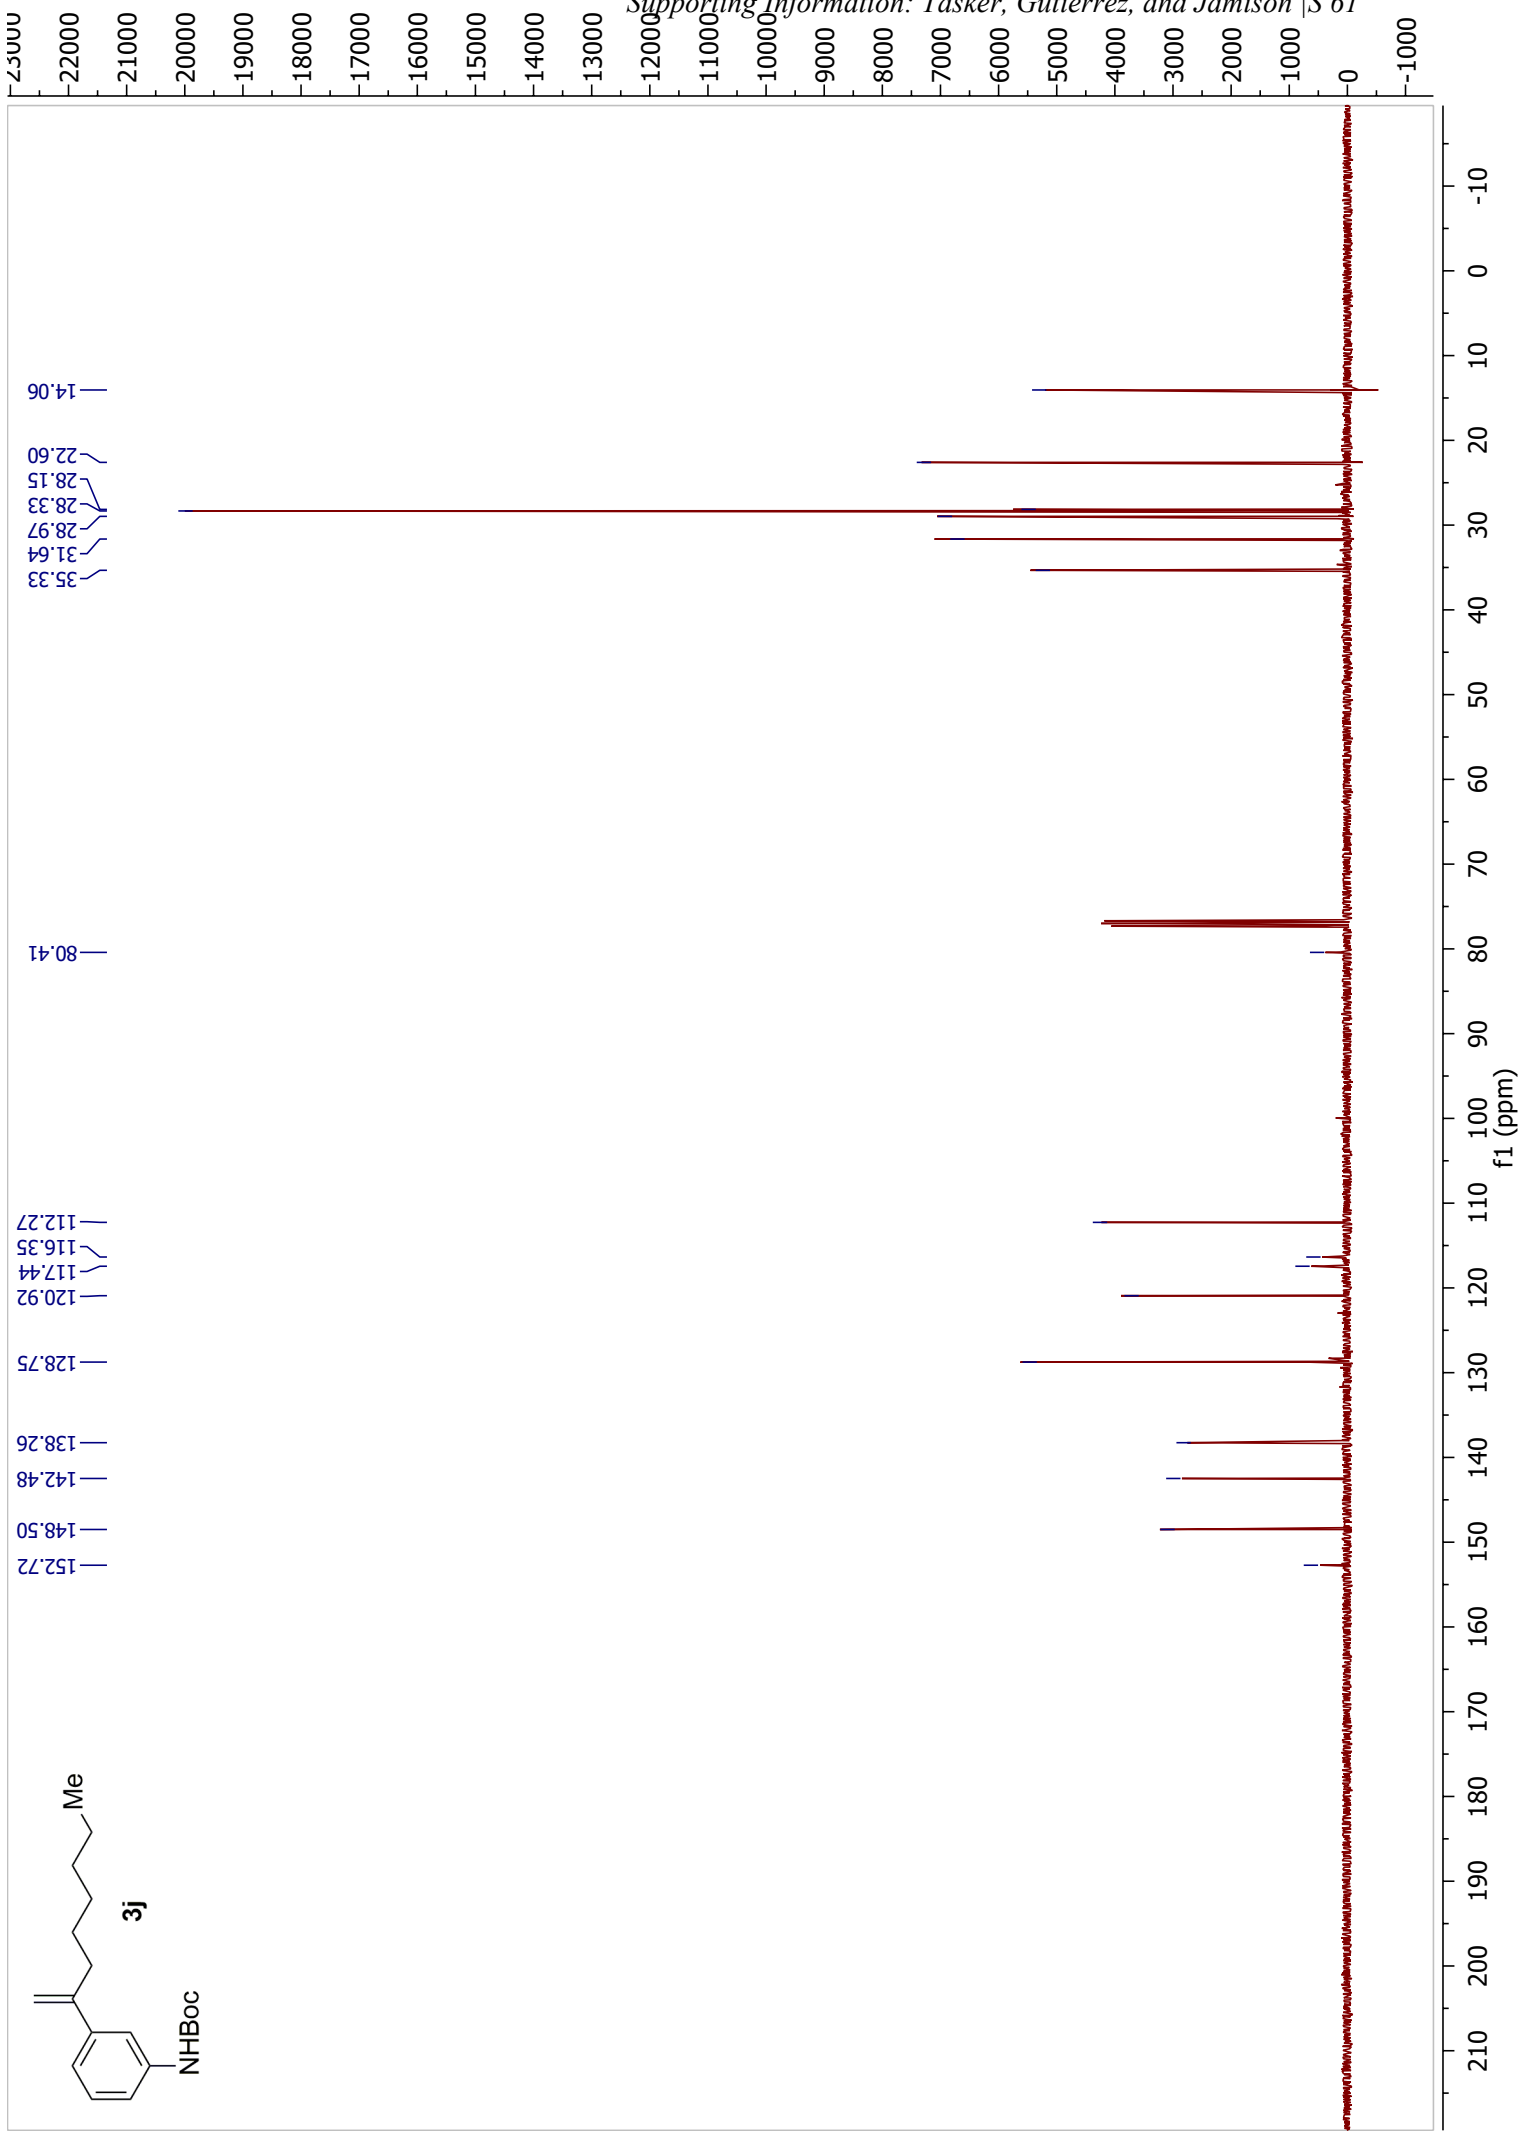

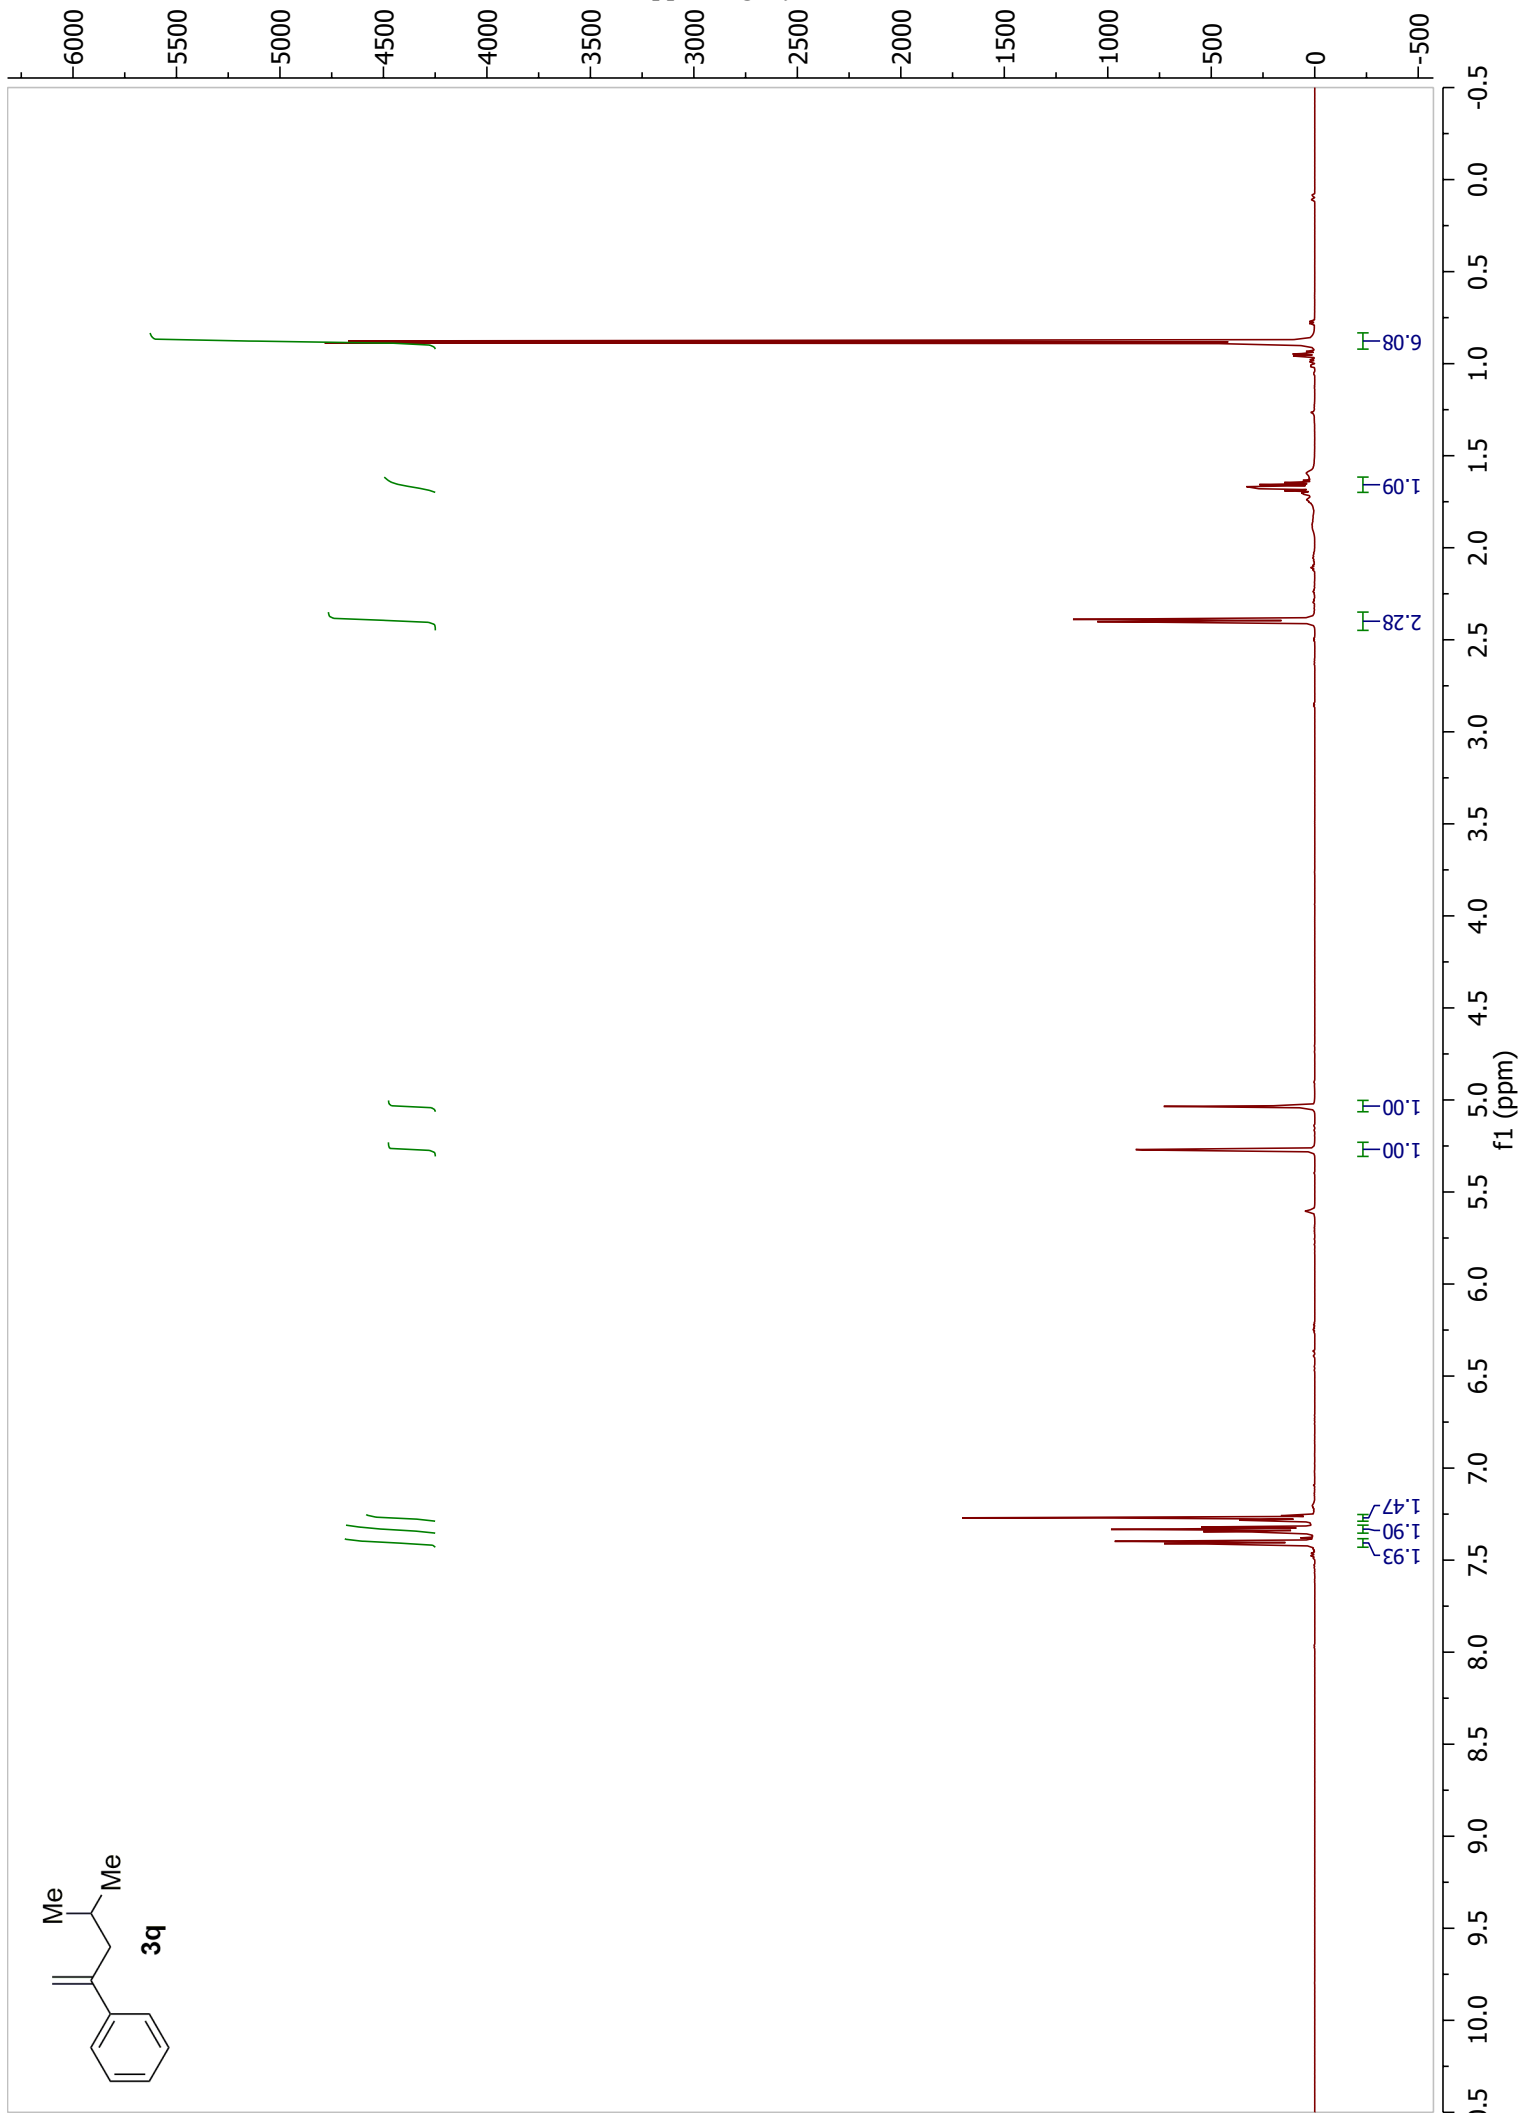

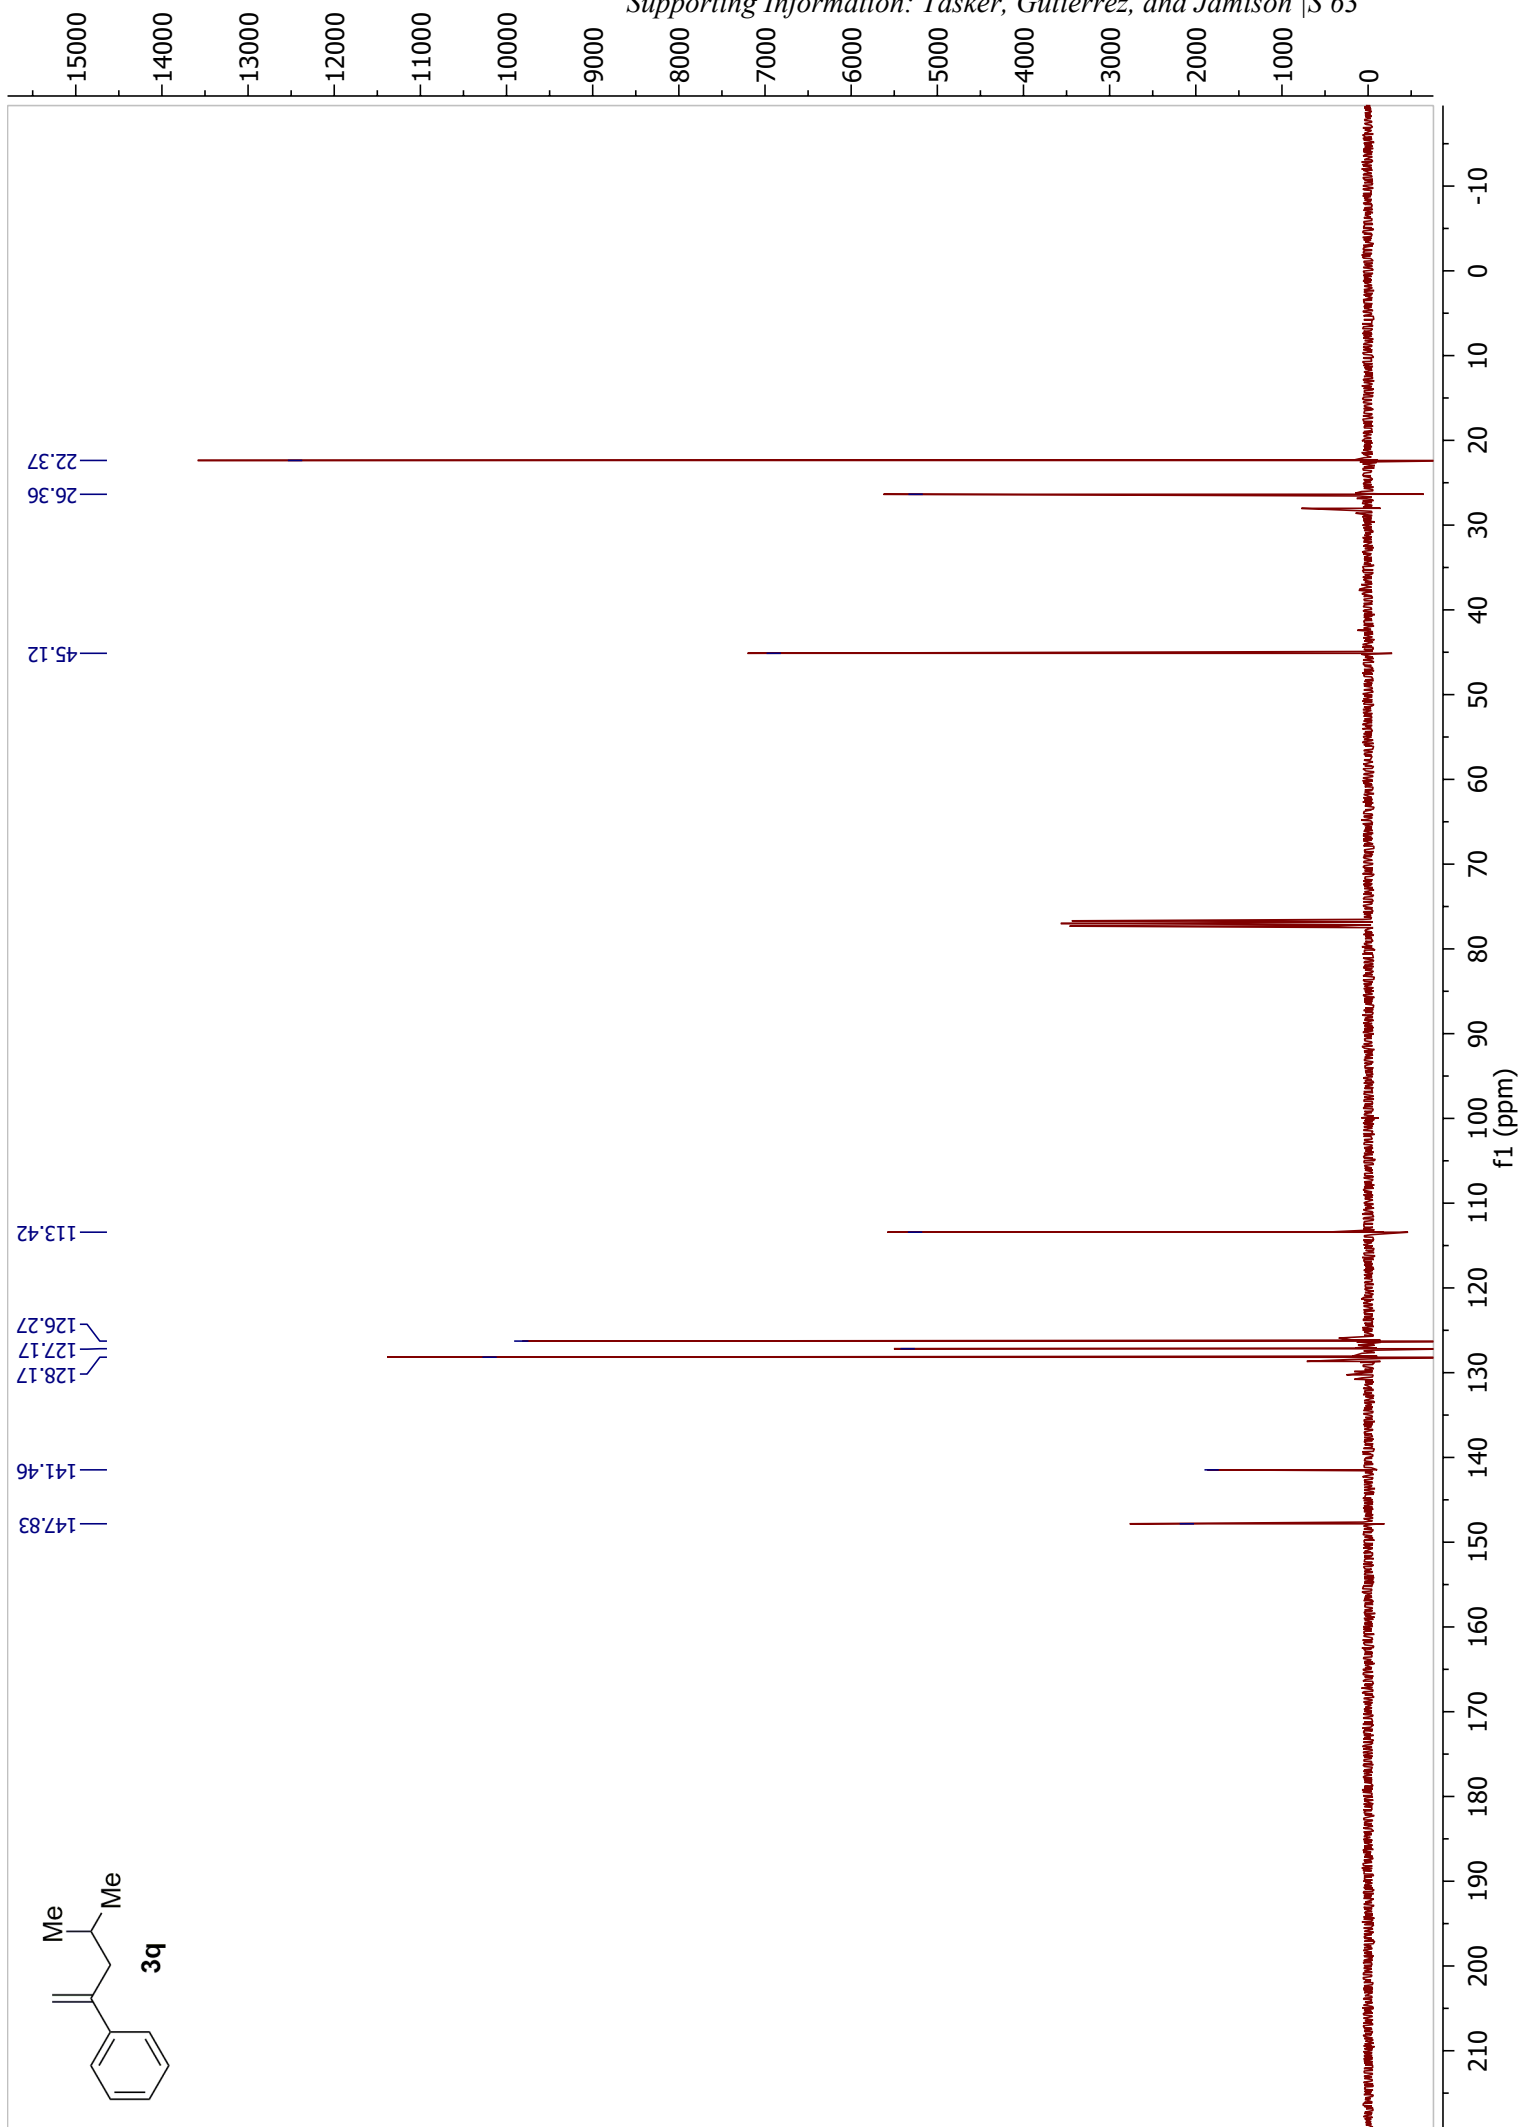

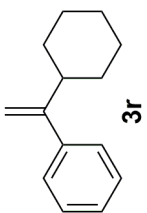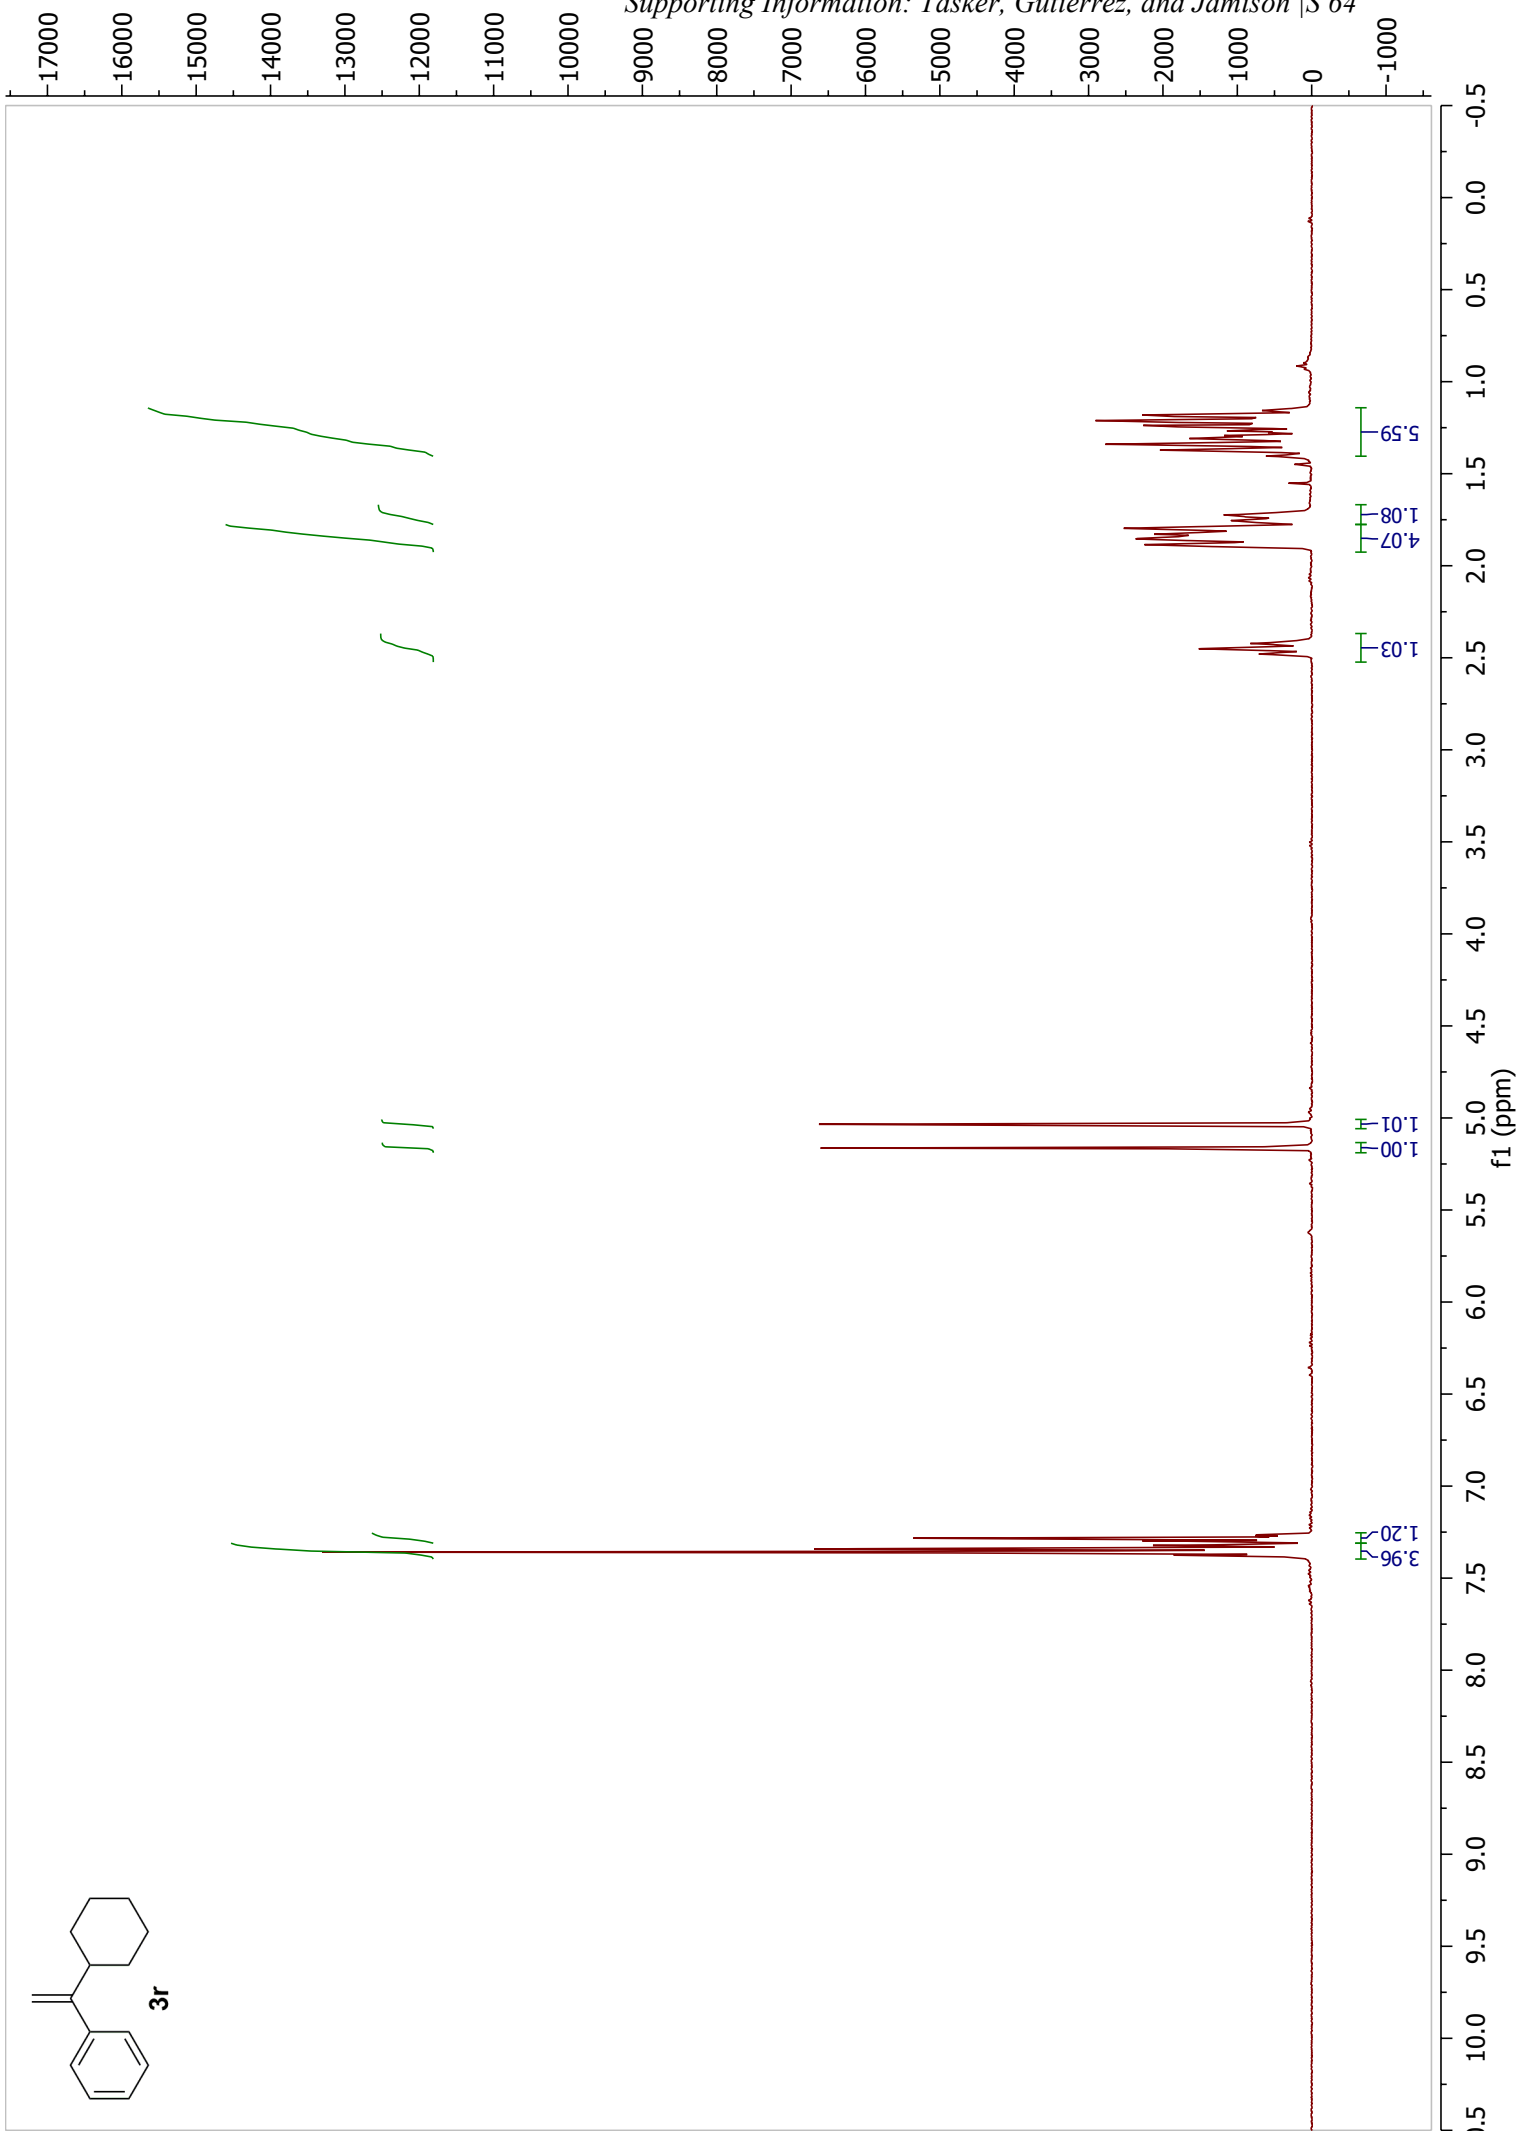



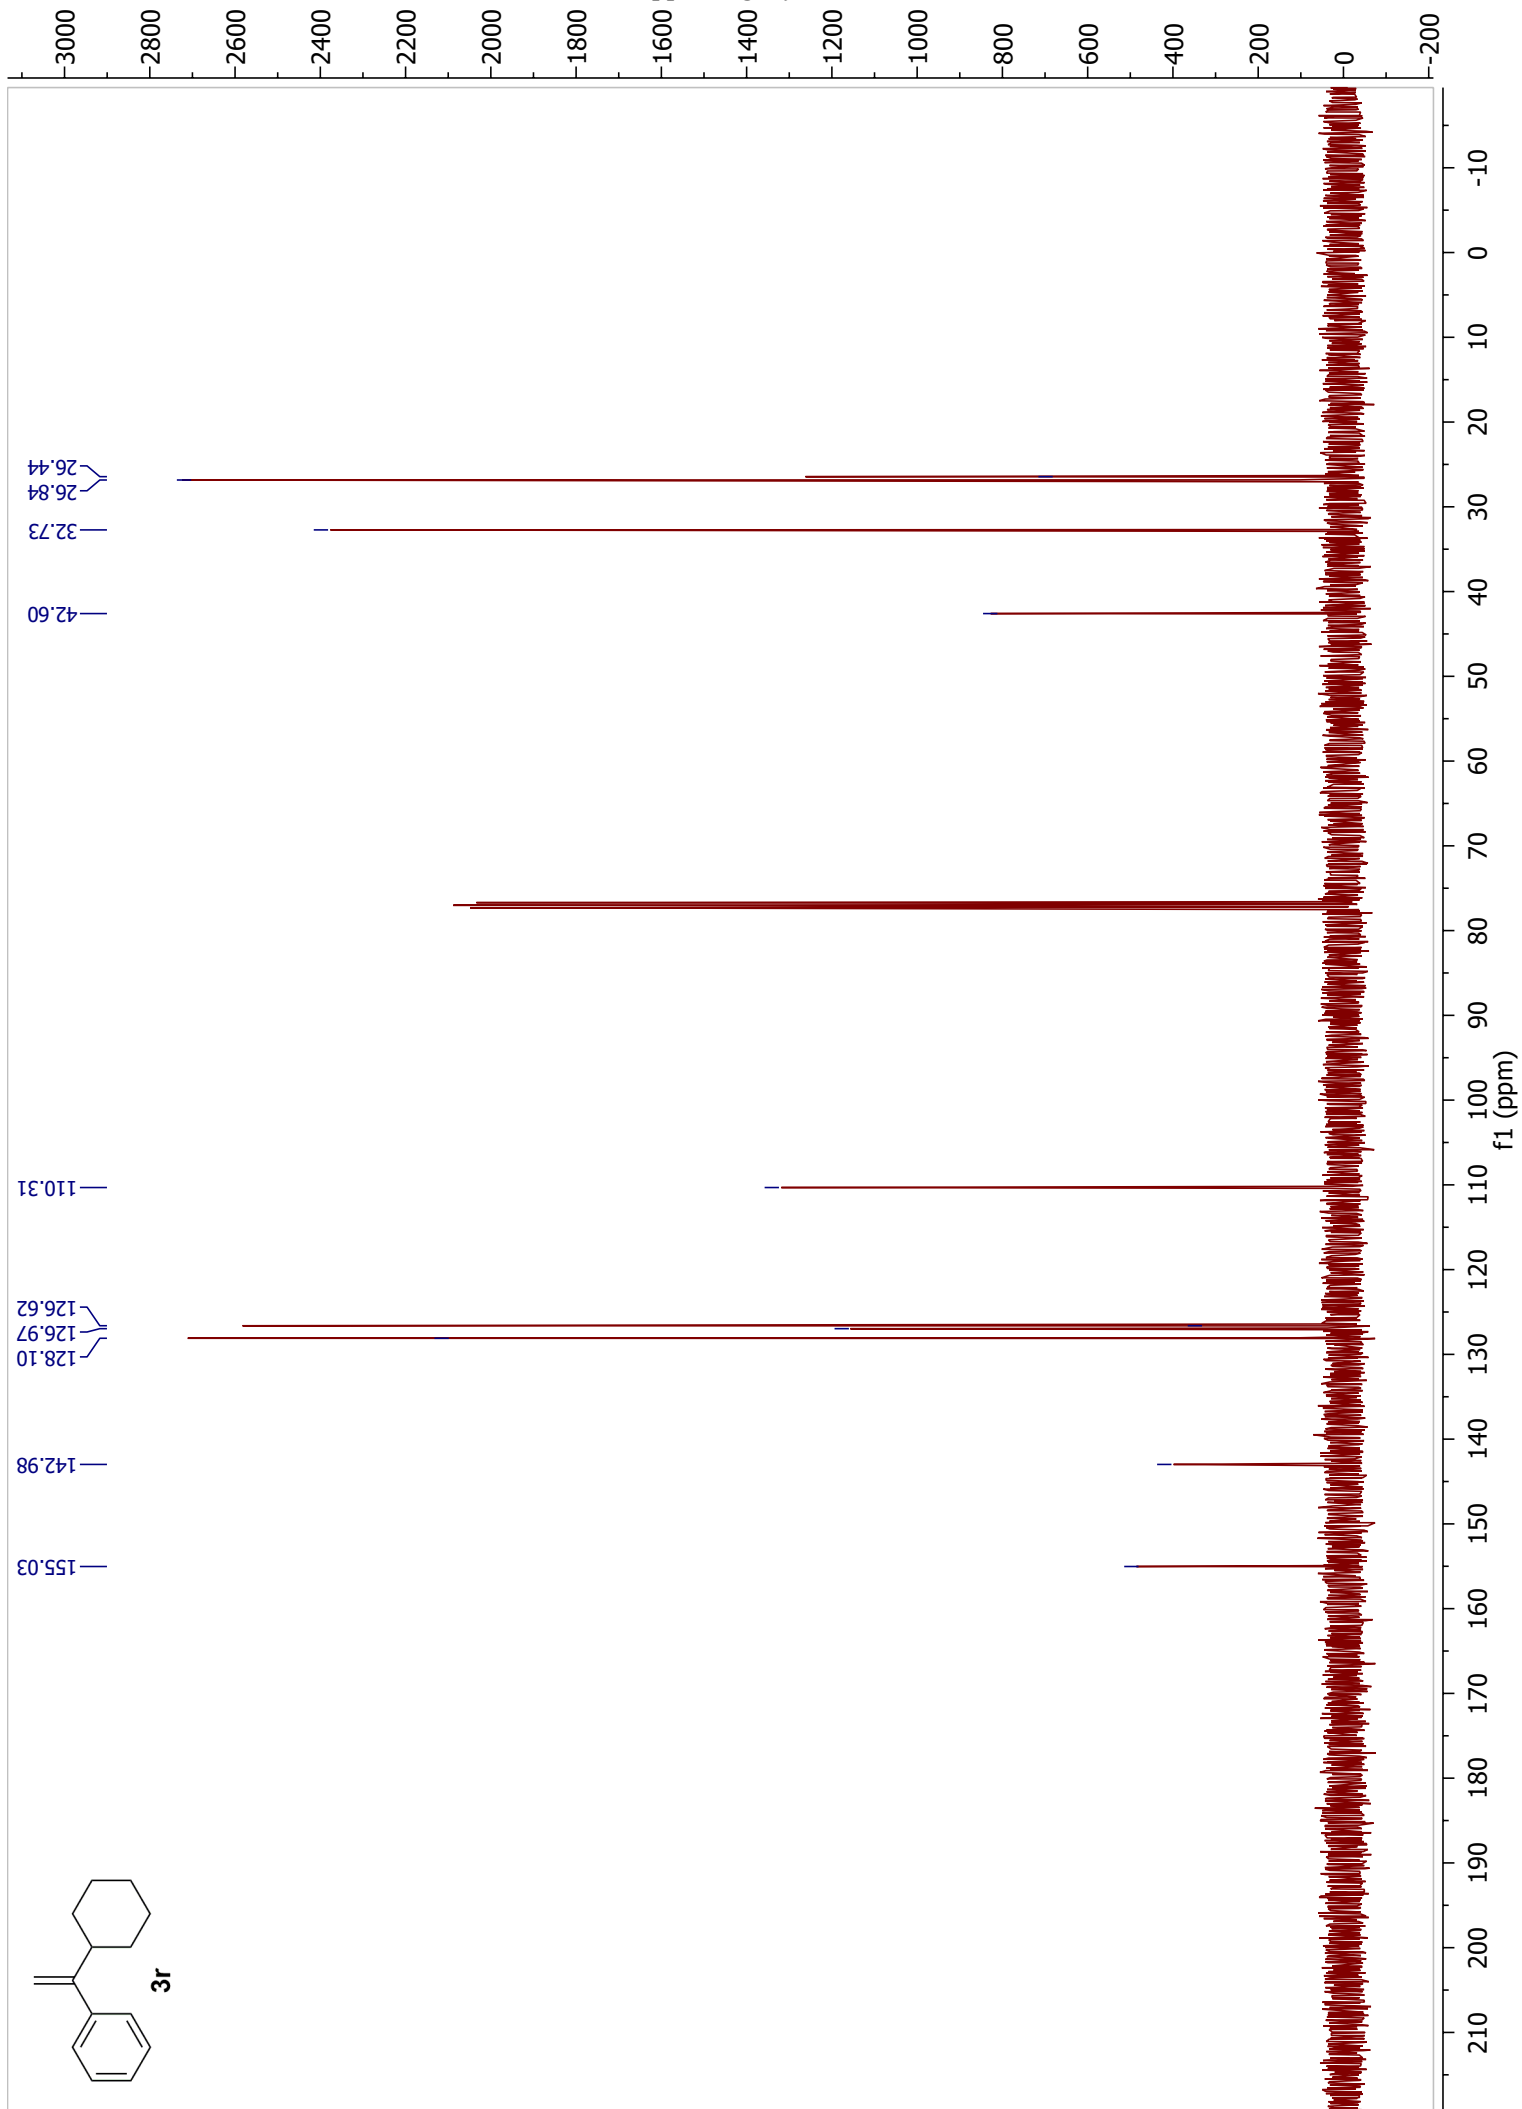

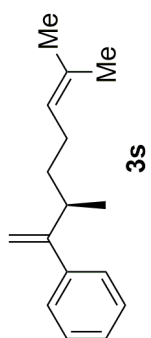**3s**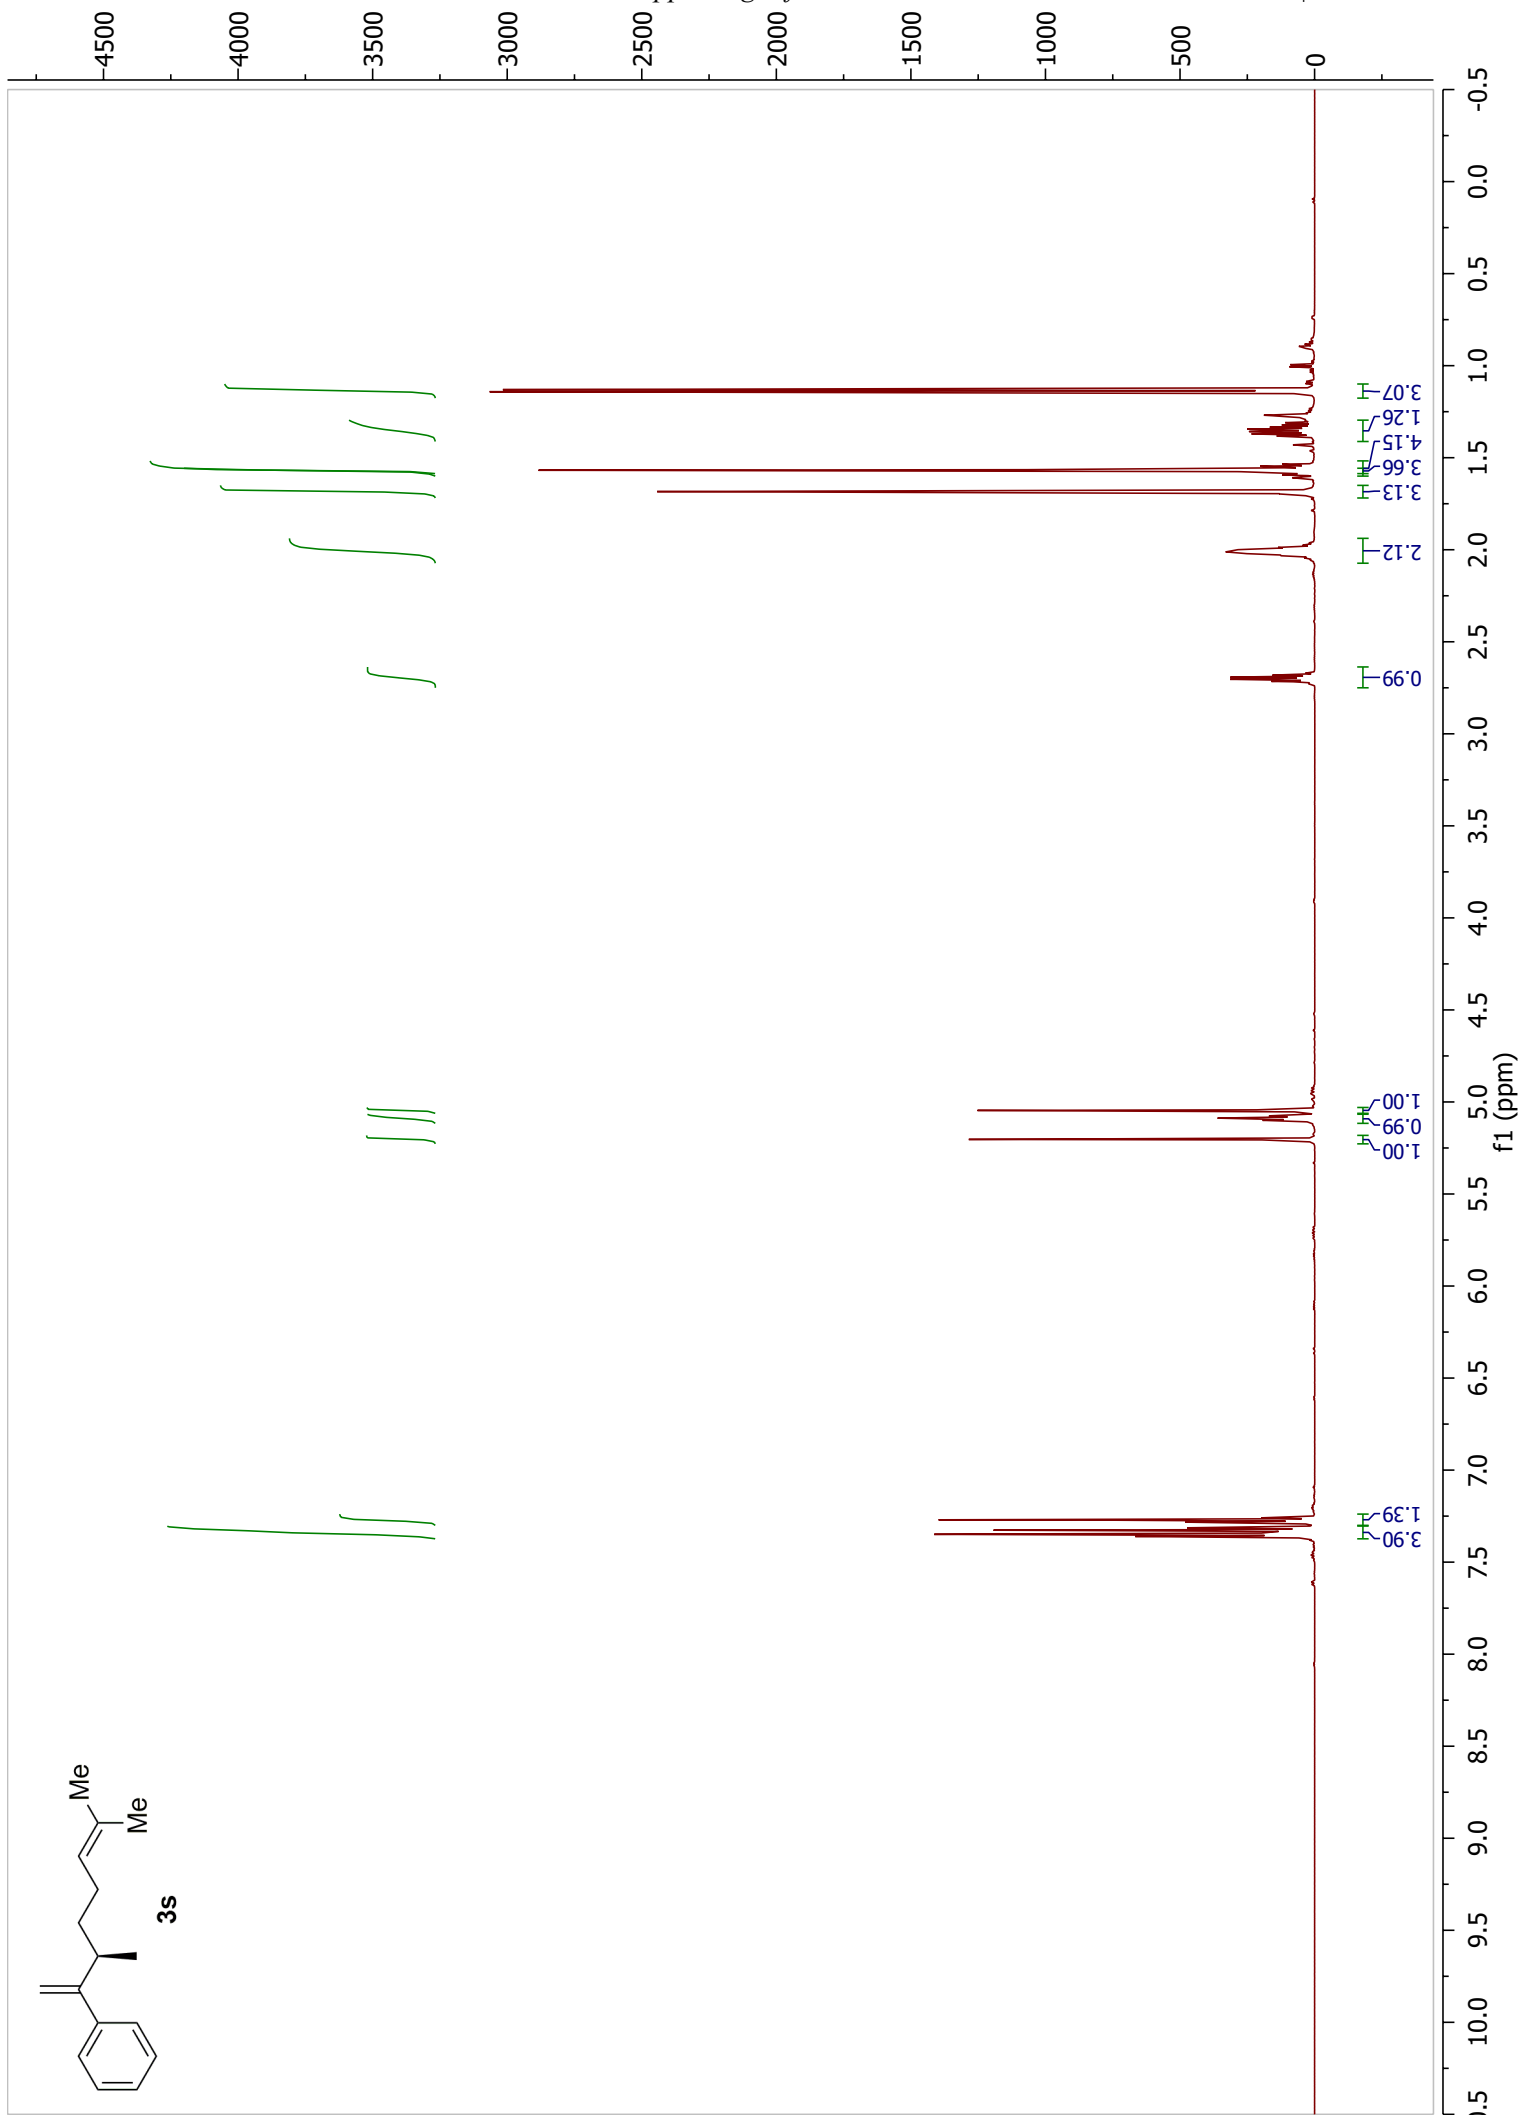

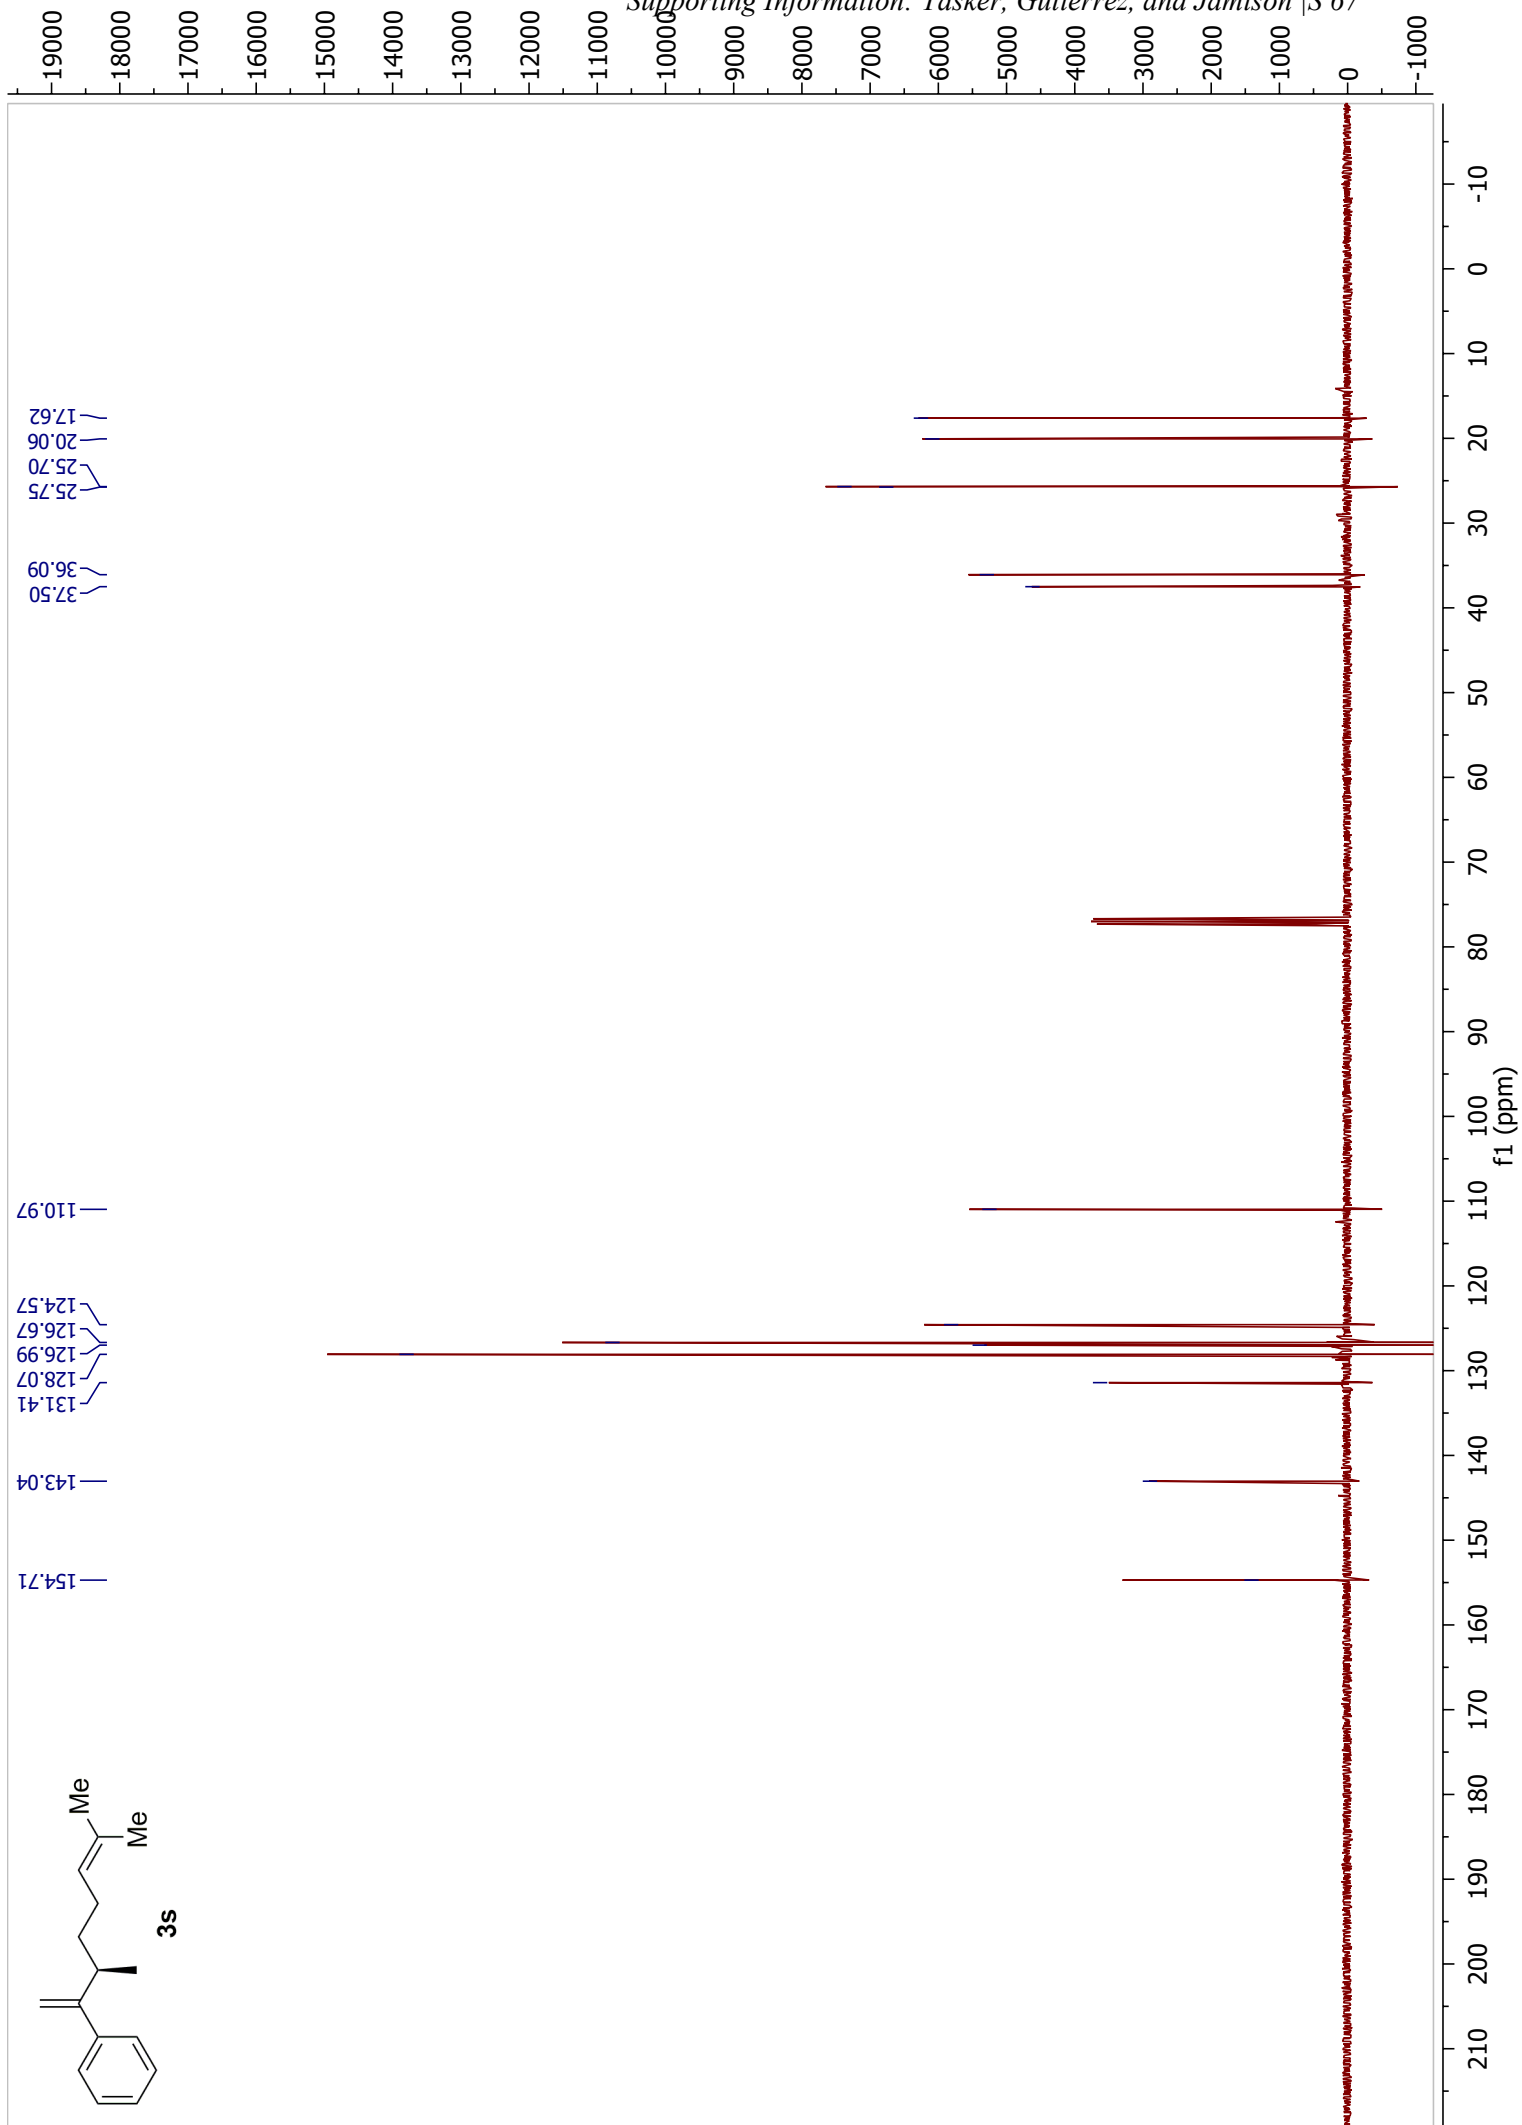

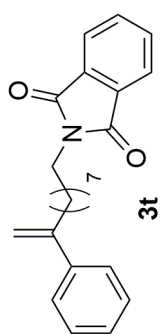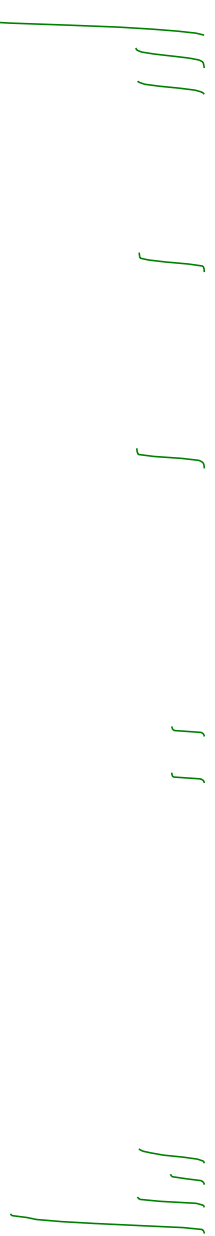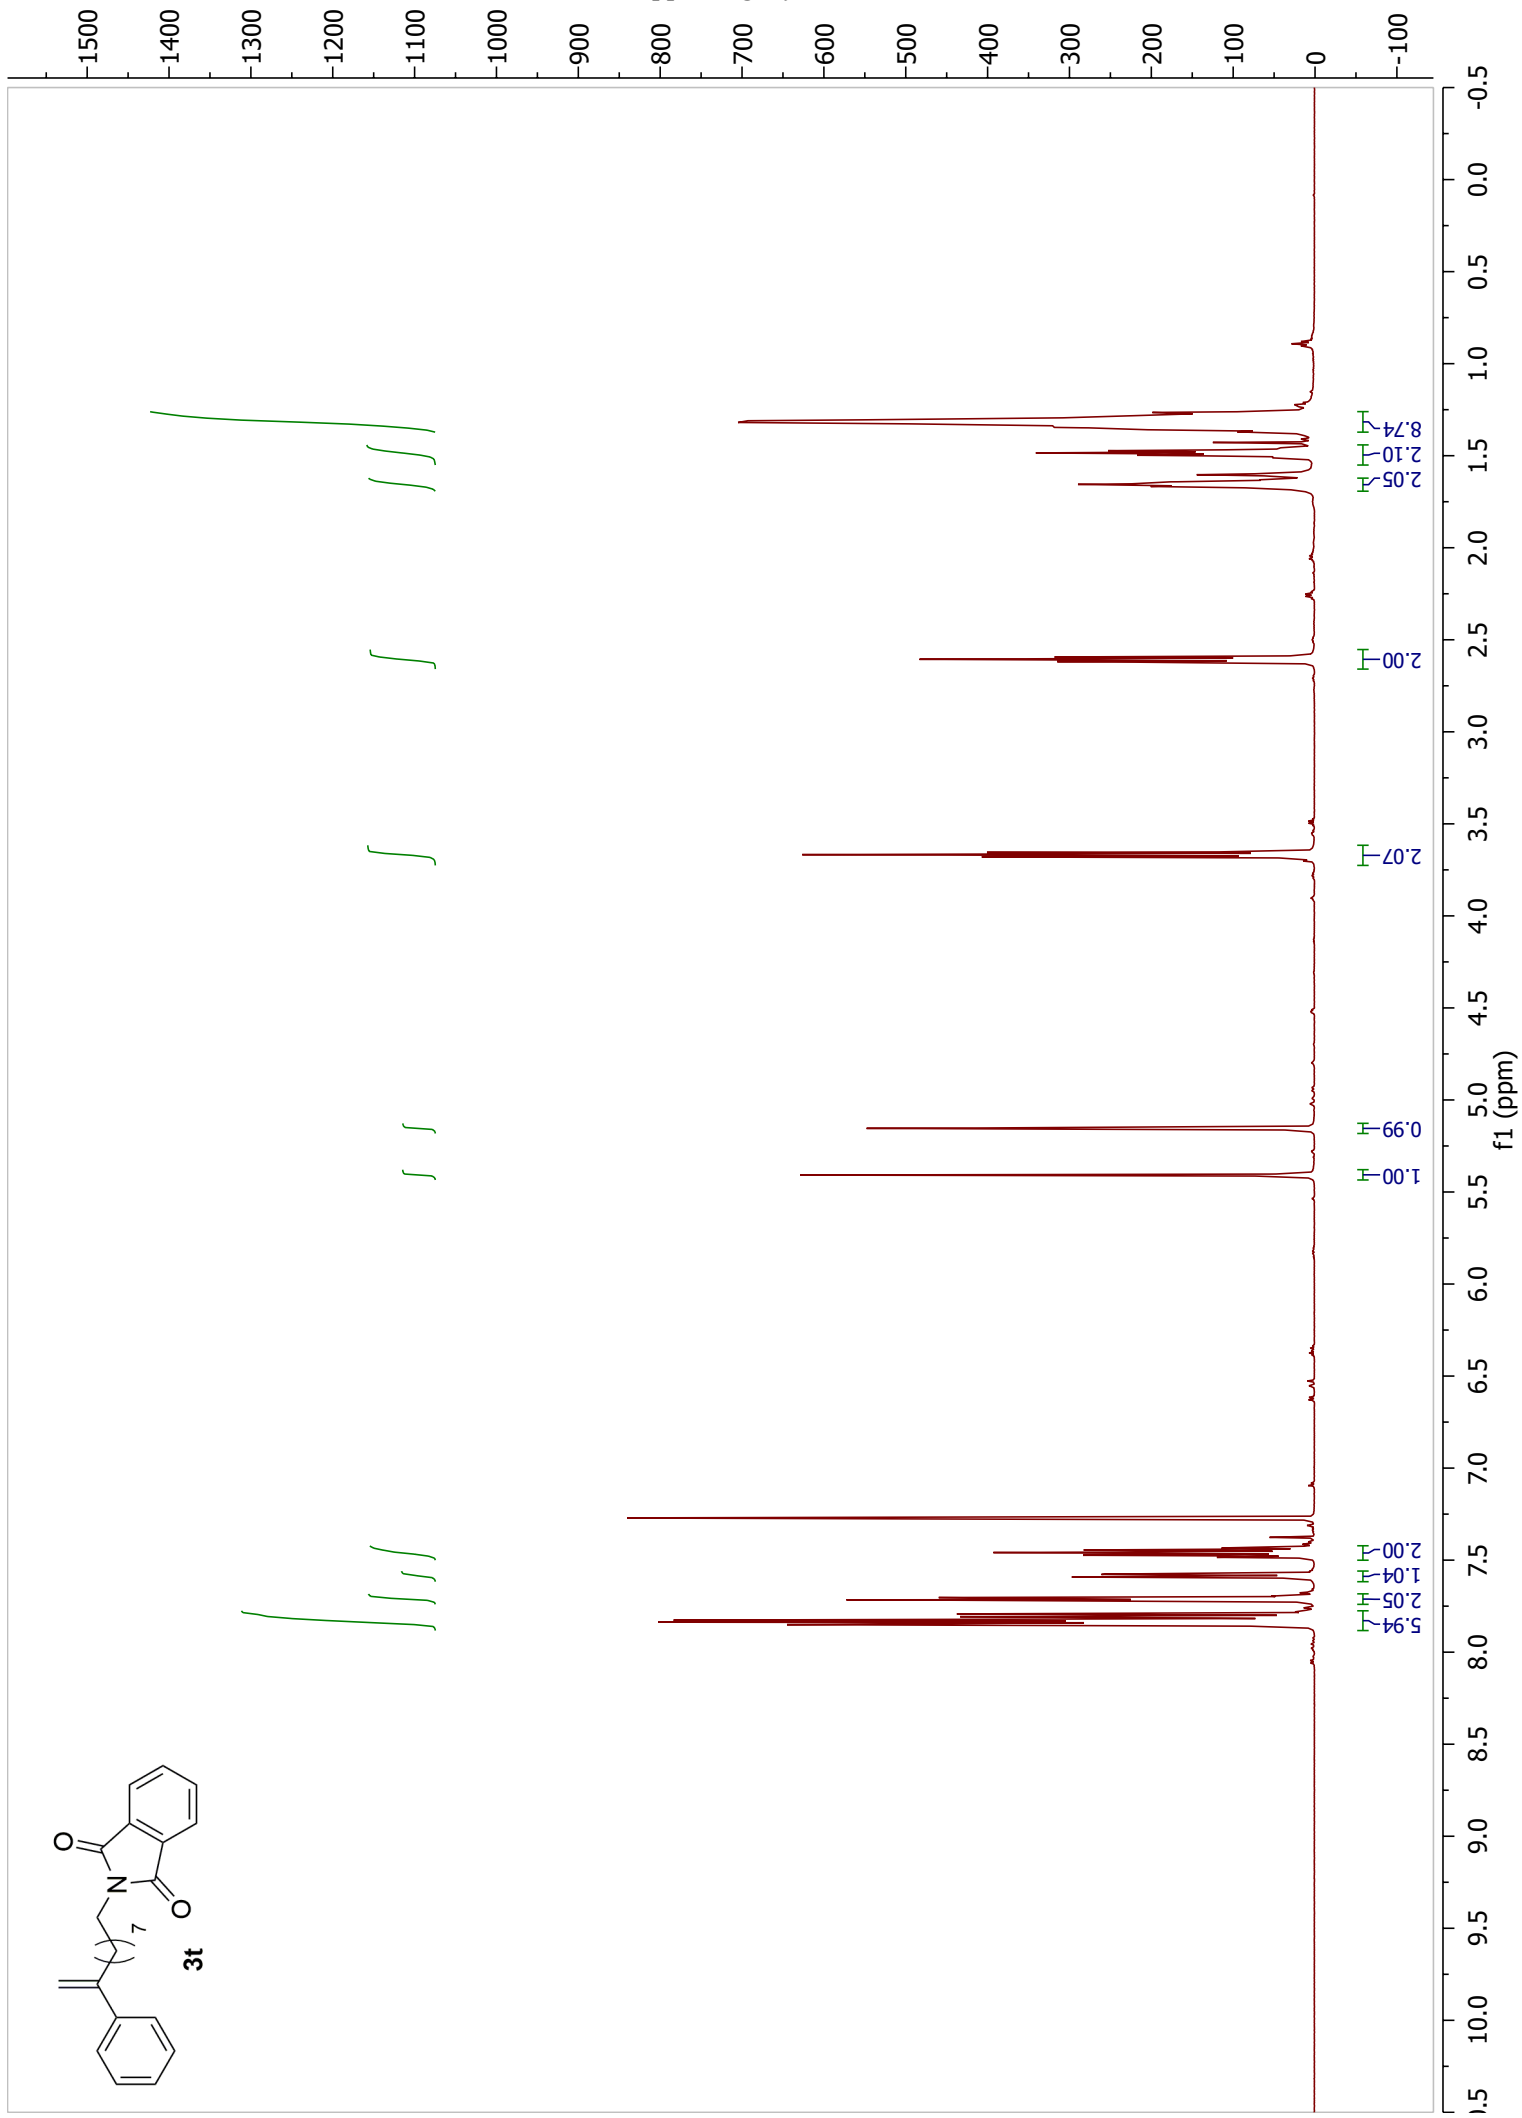

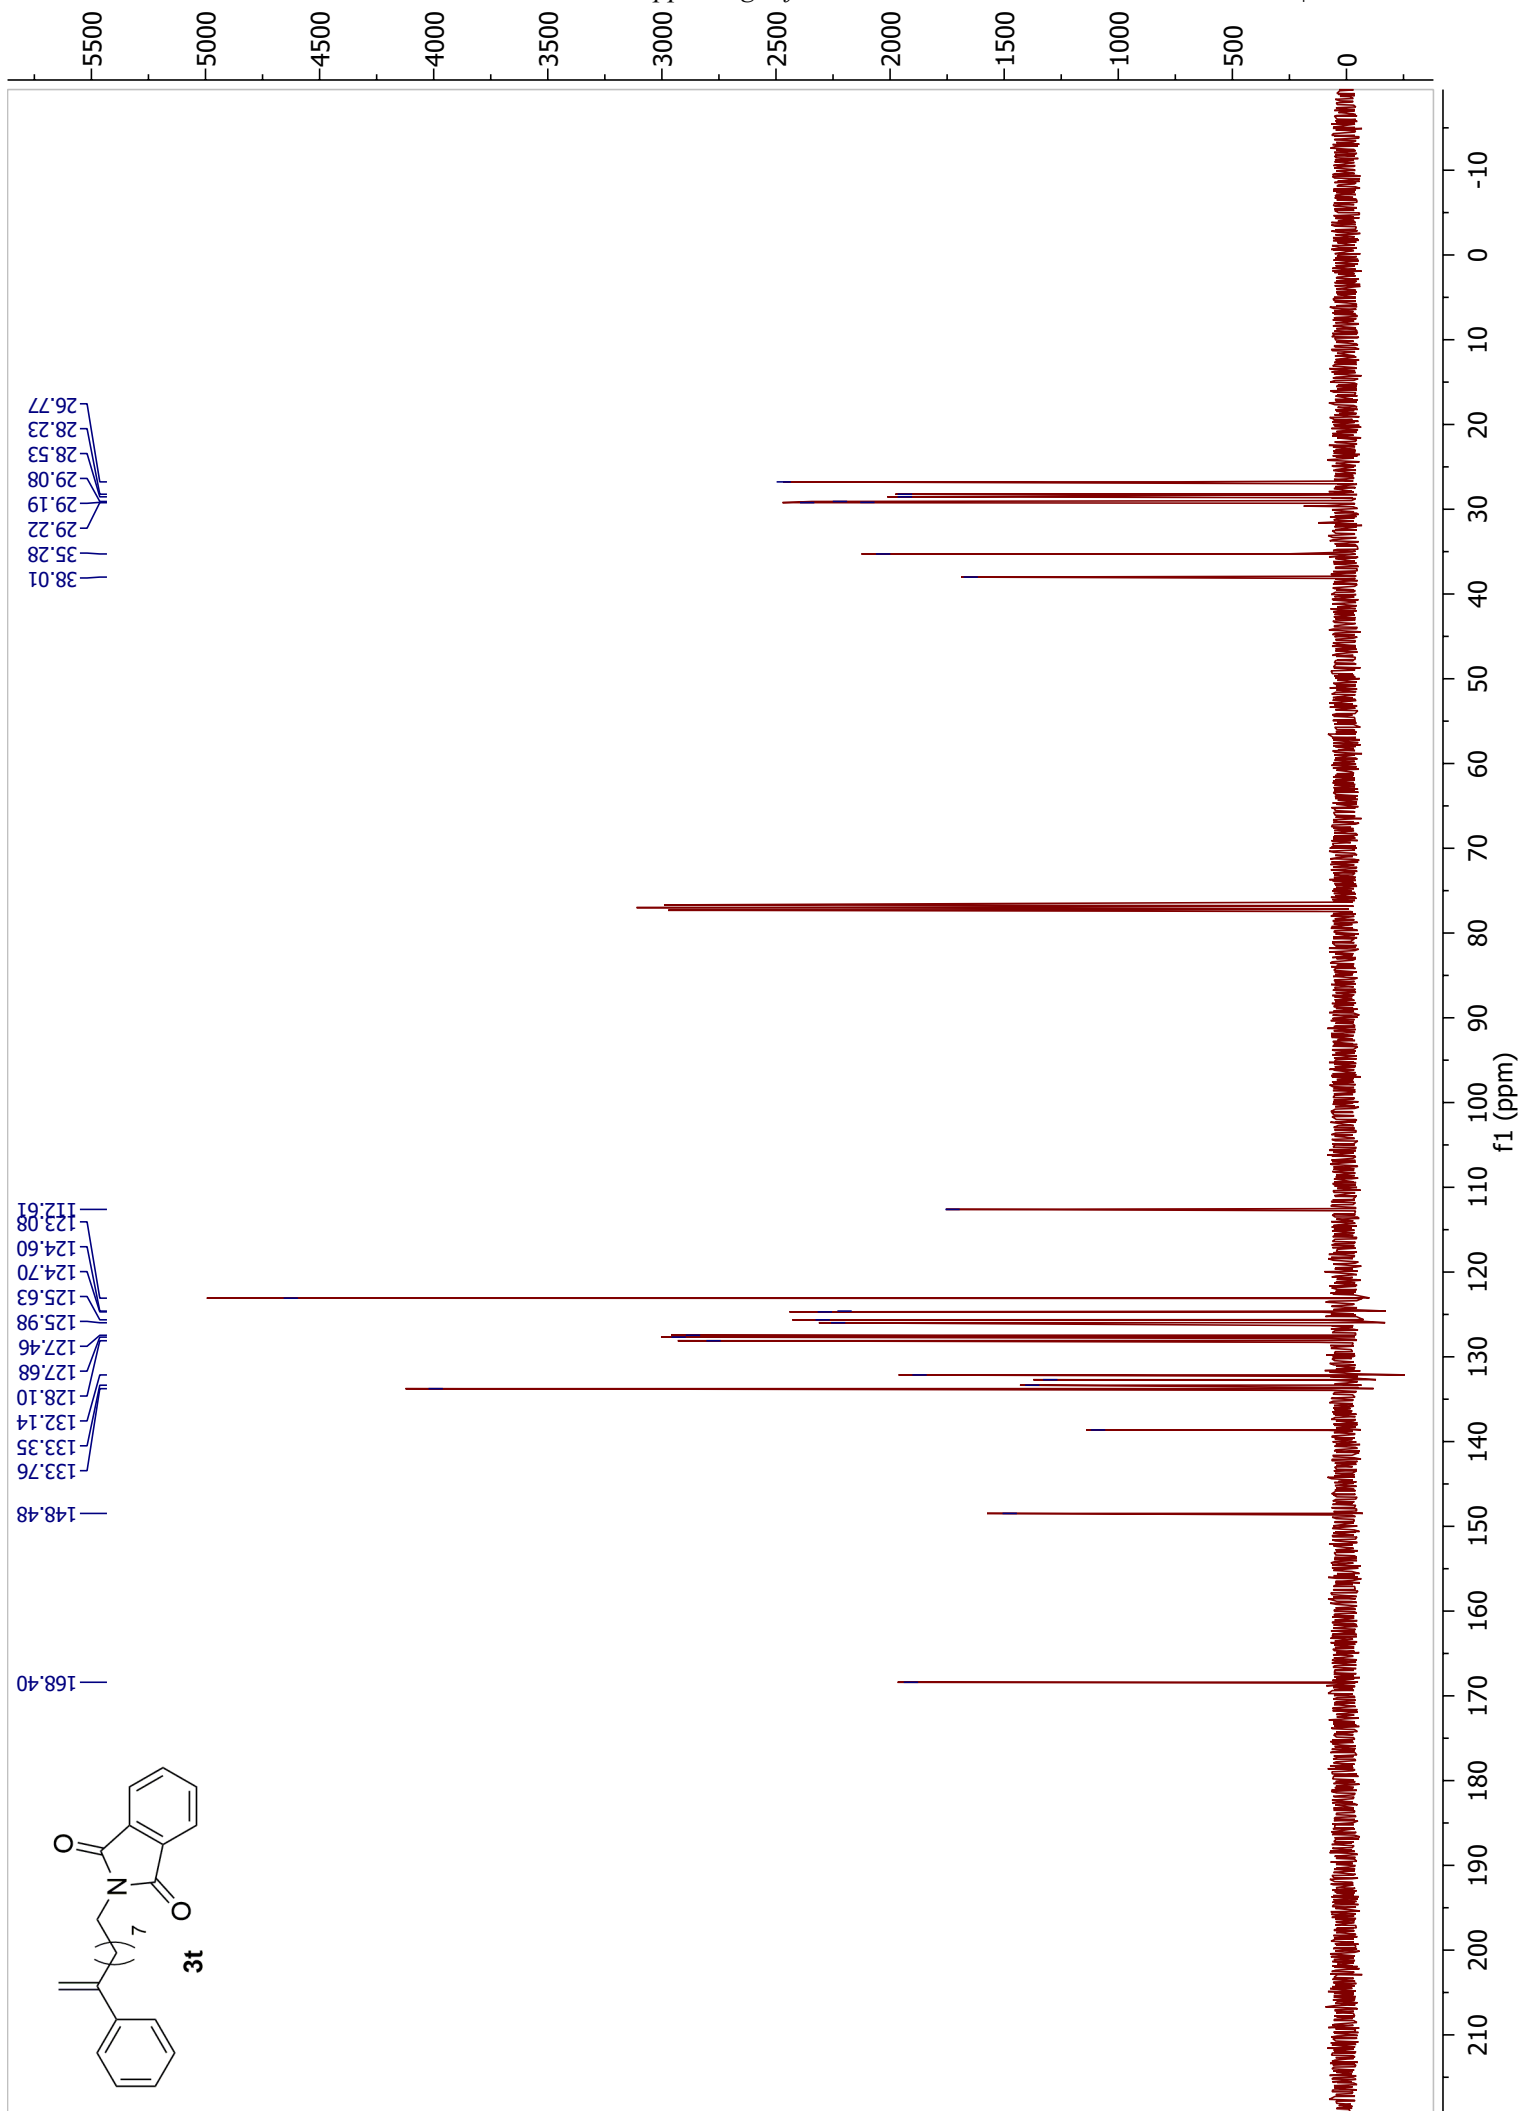

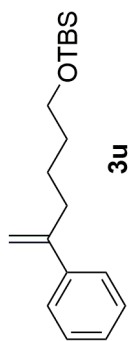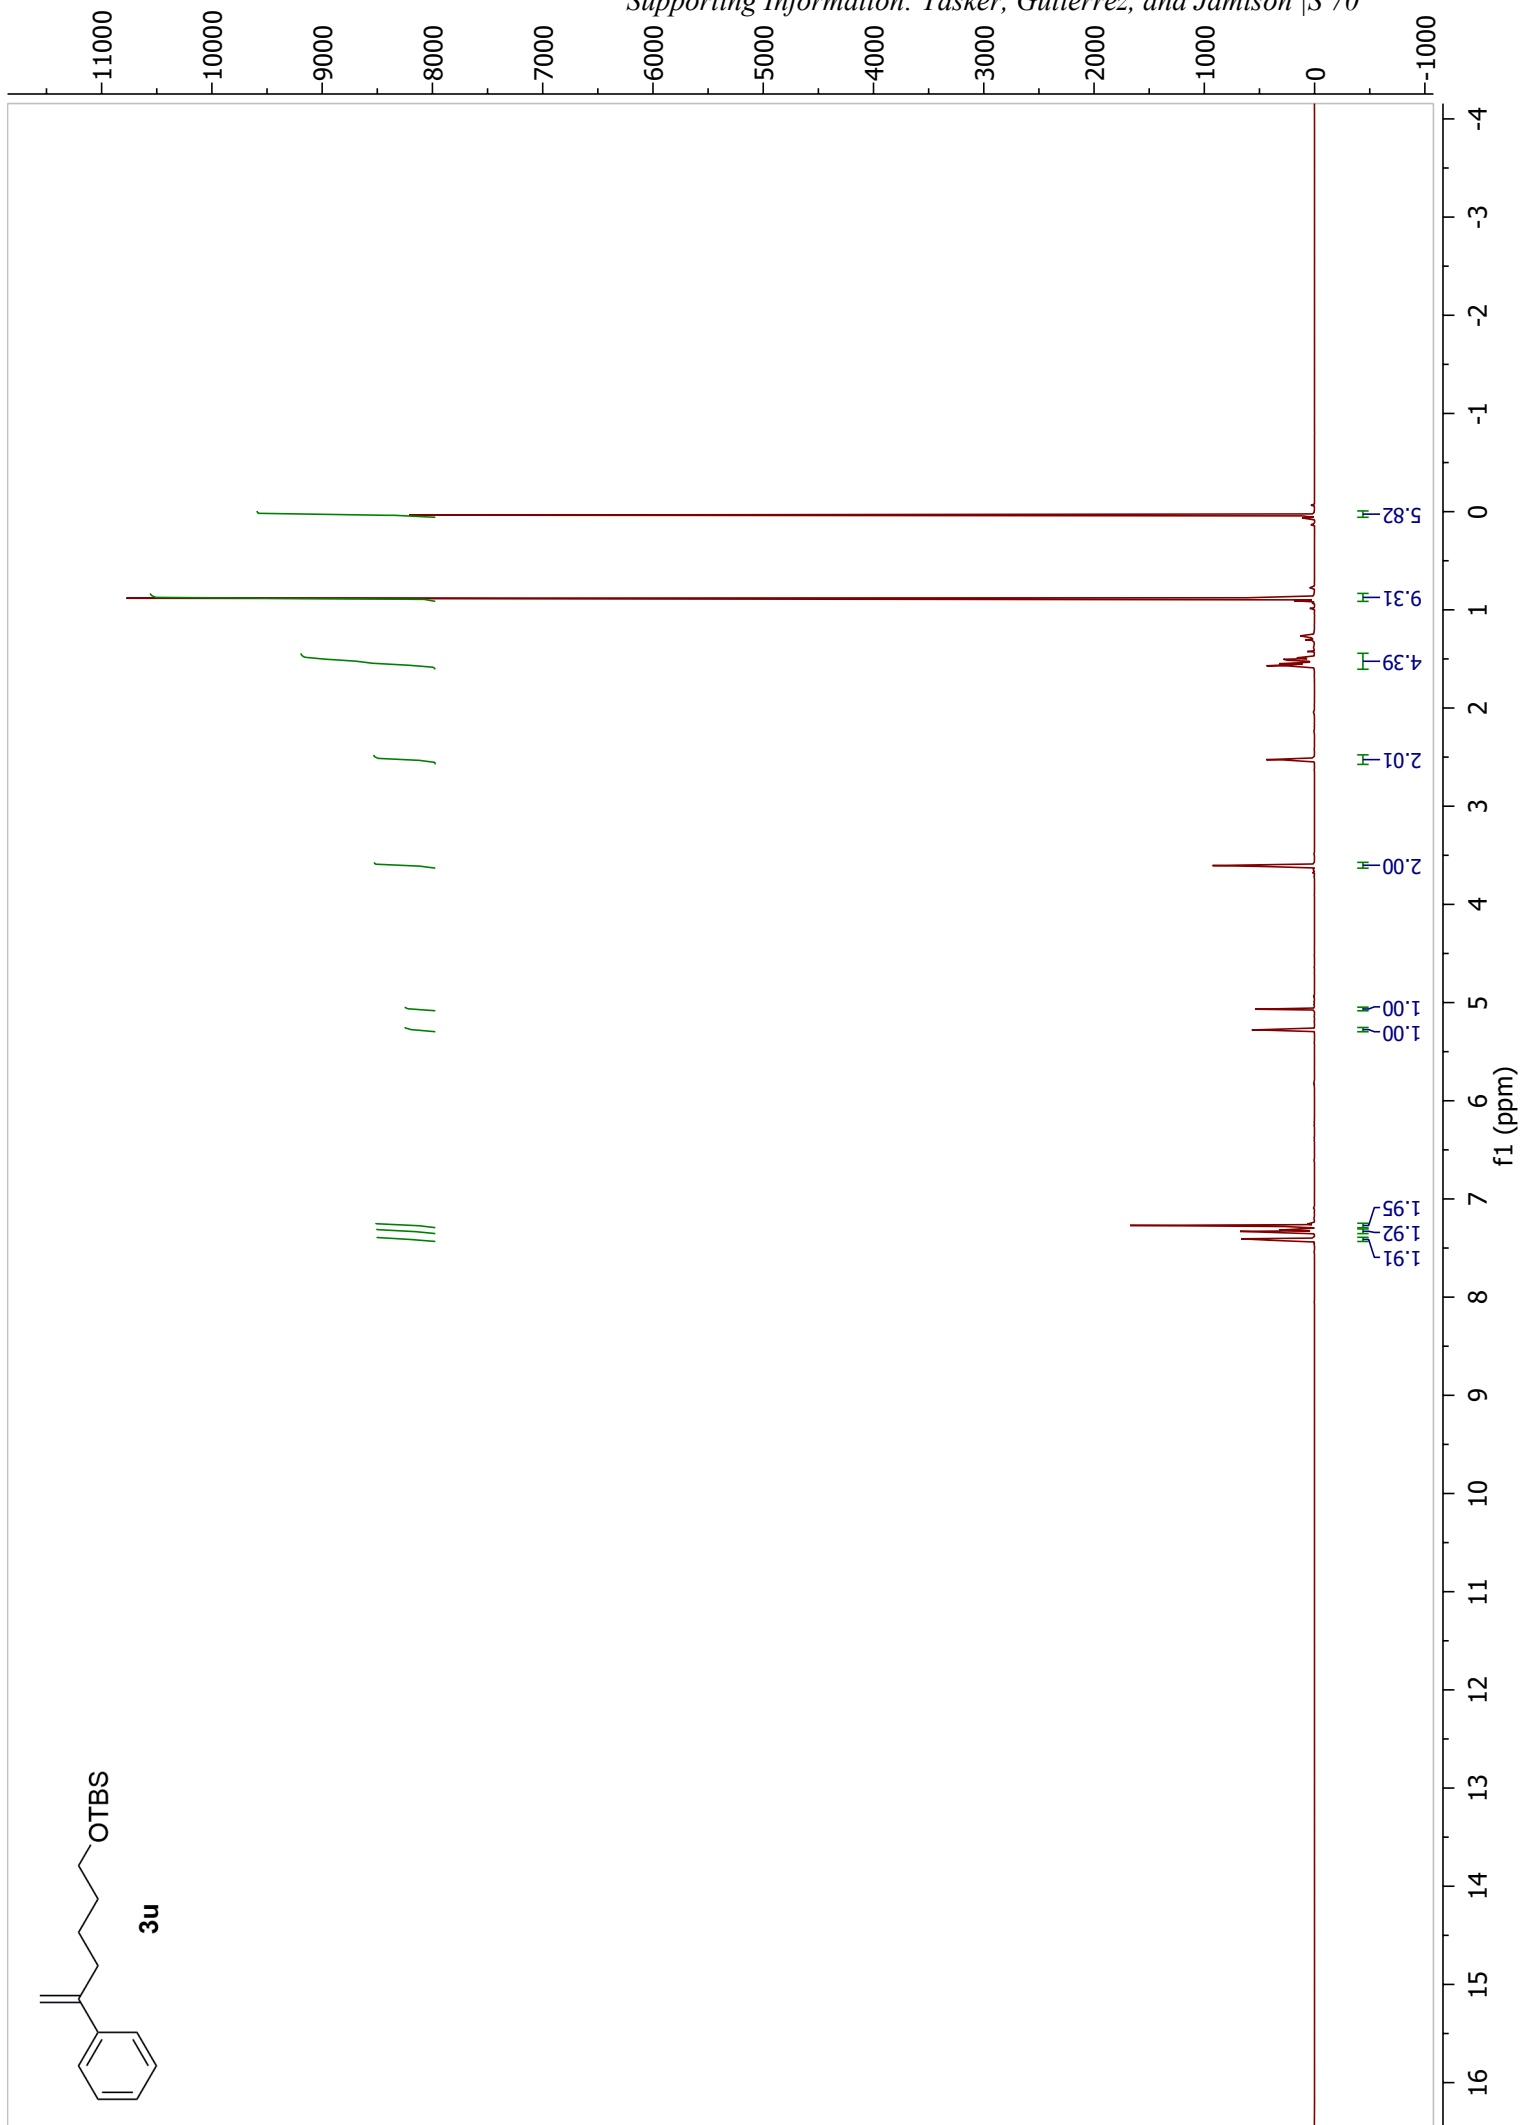

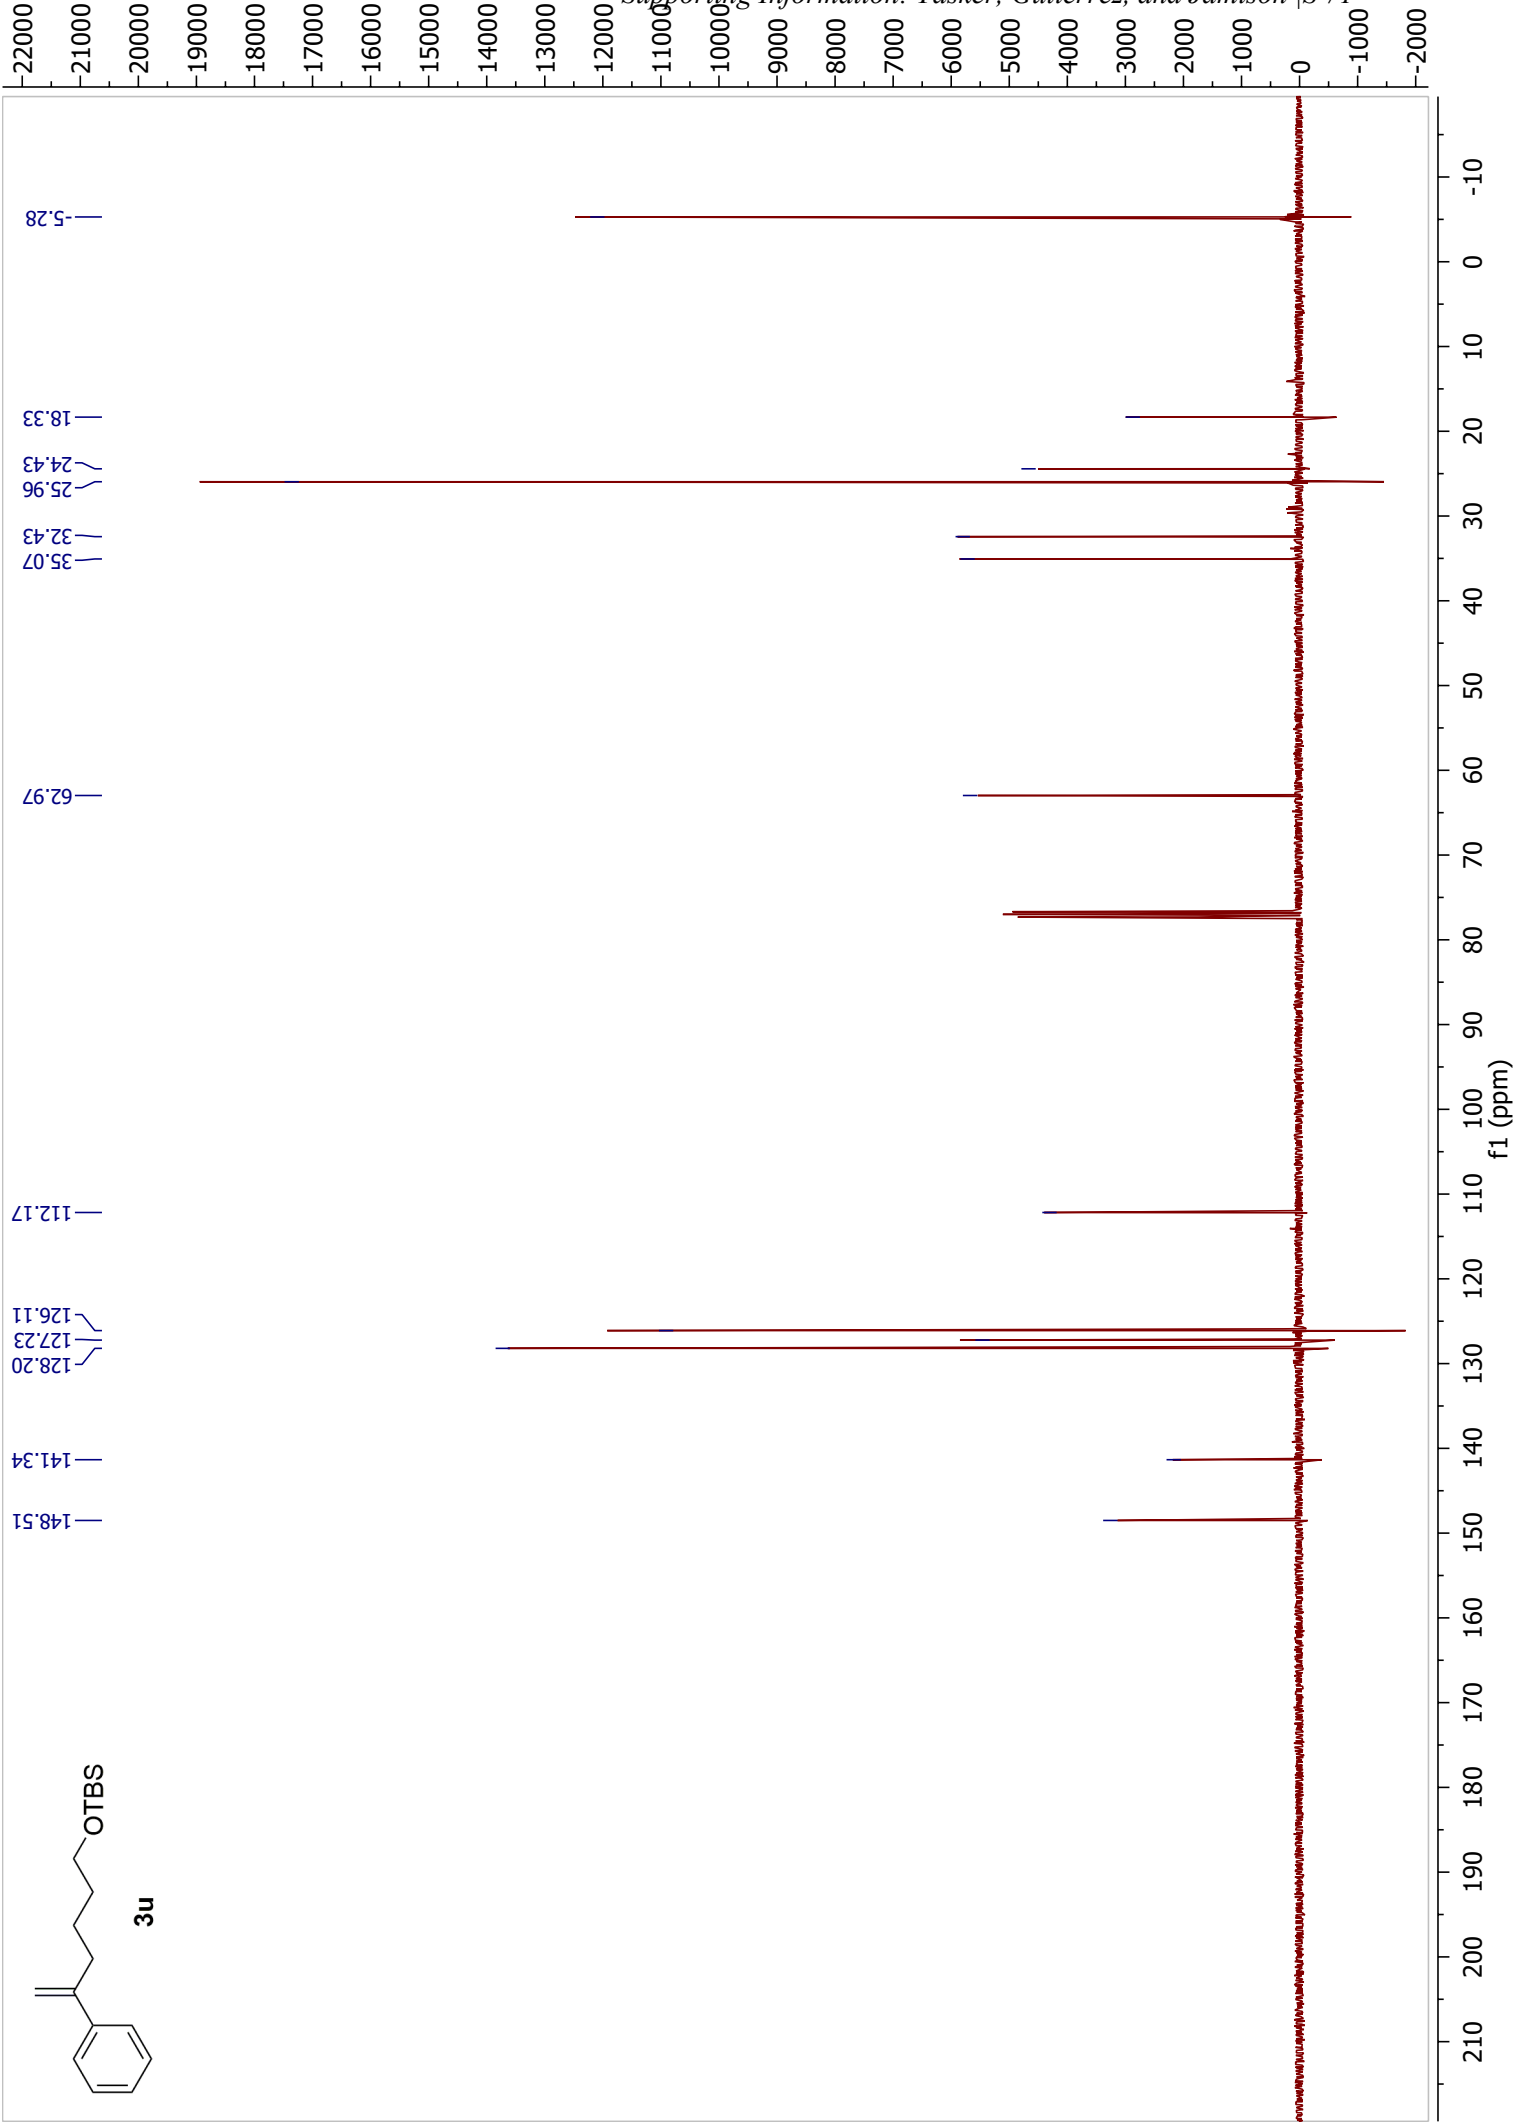

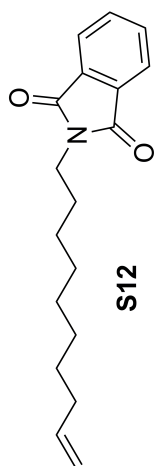

S12

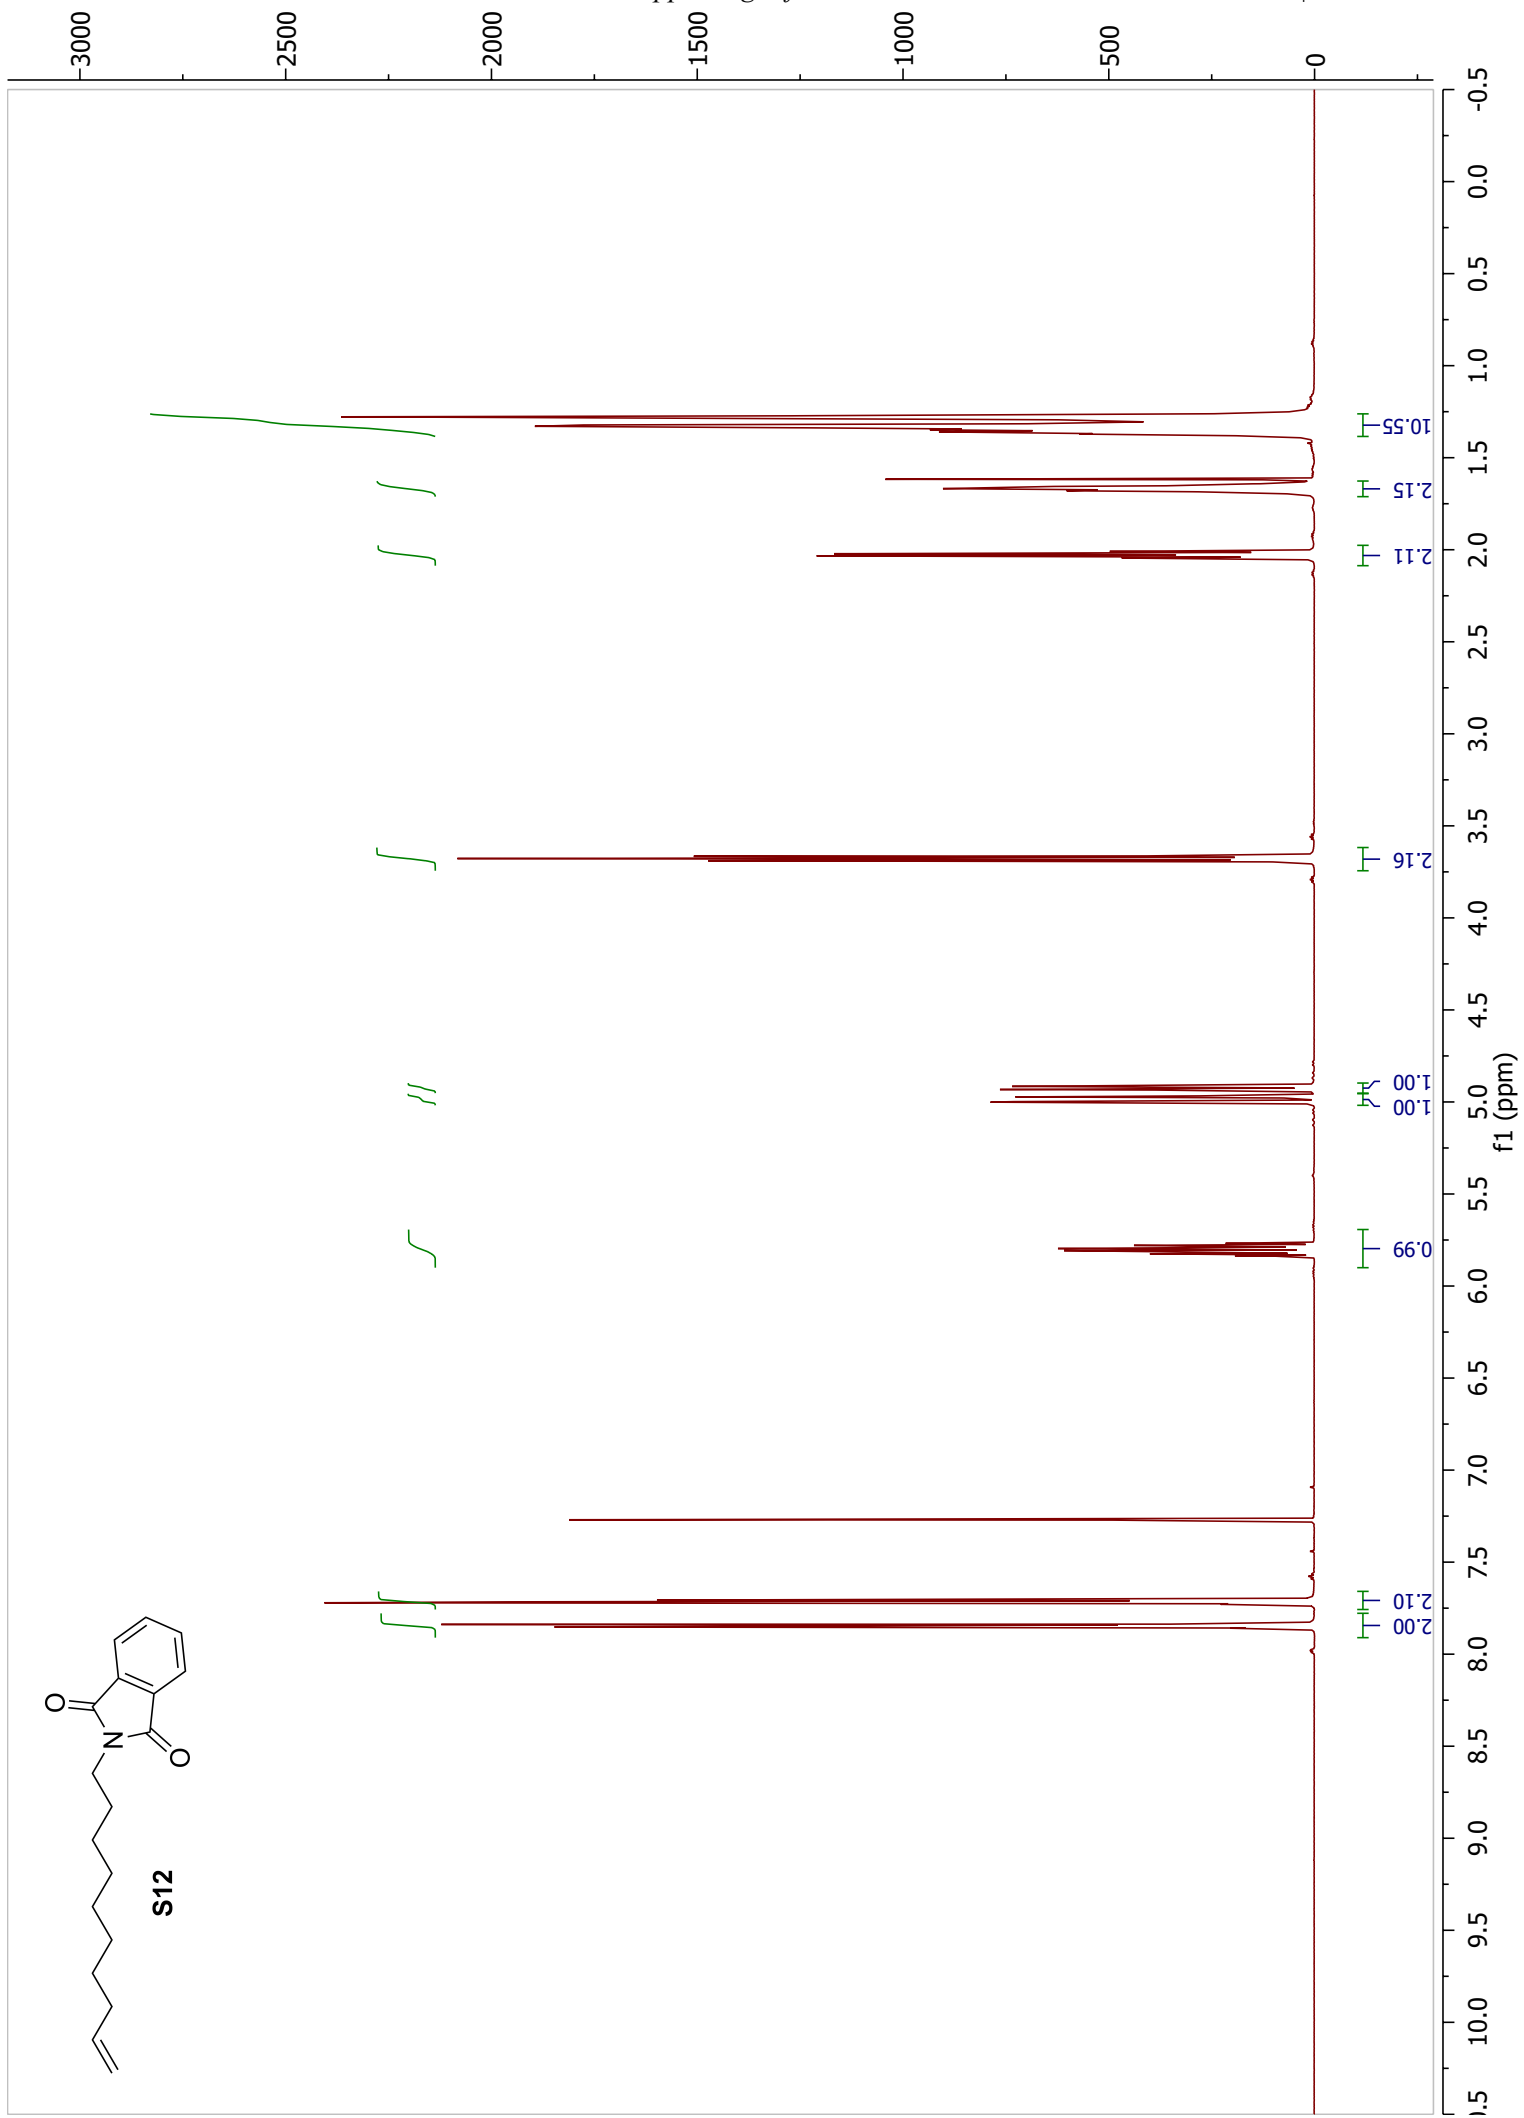



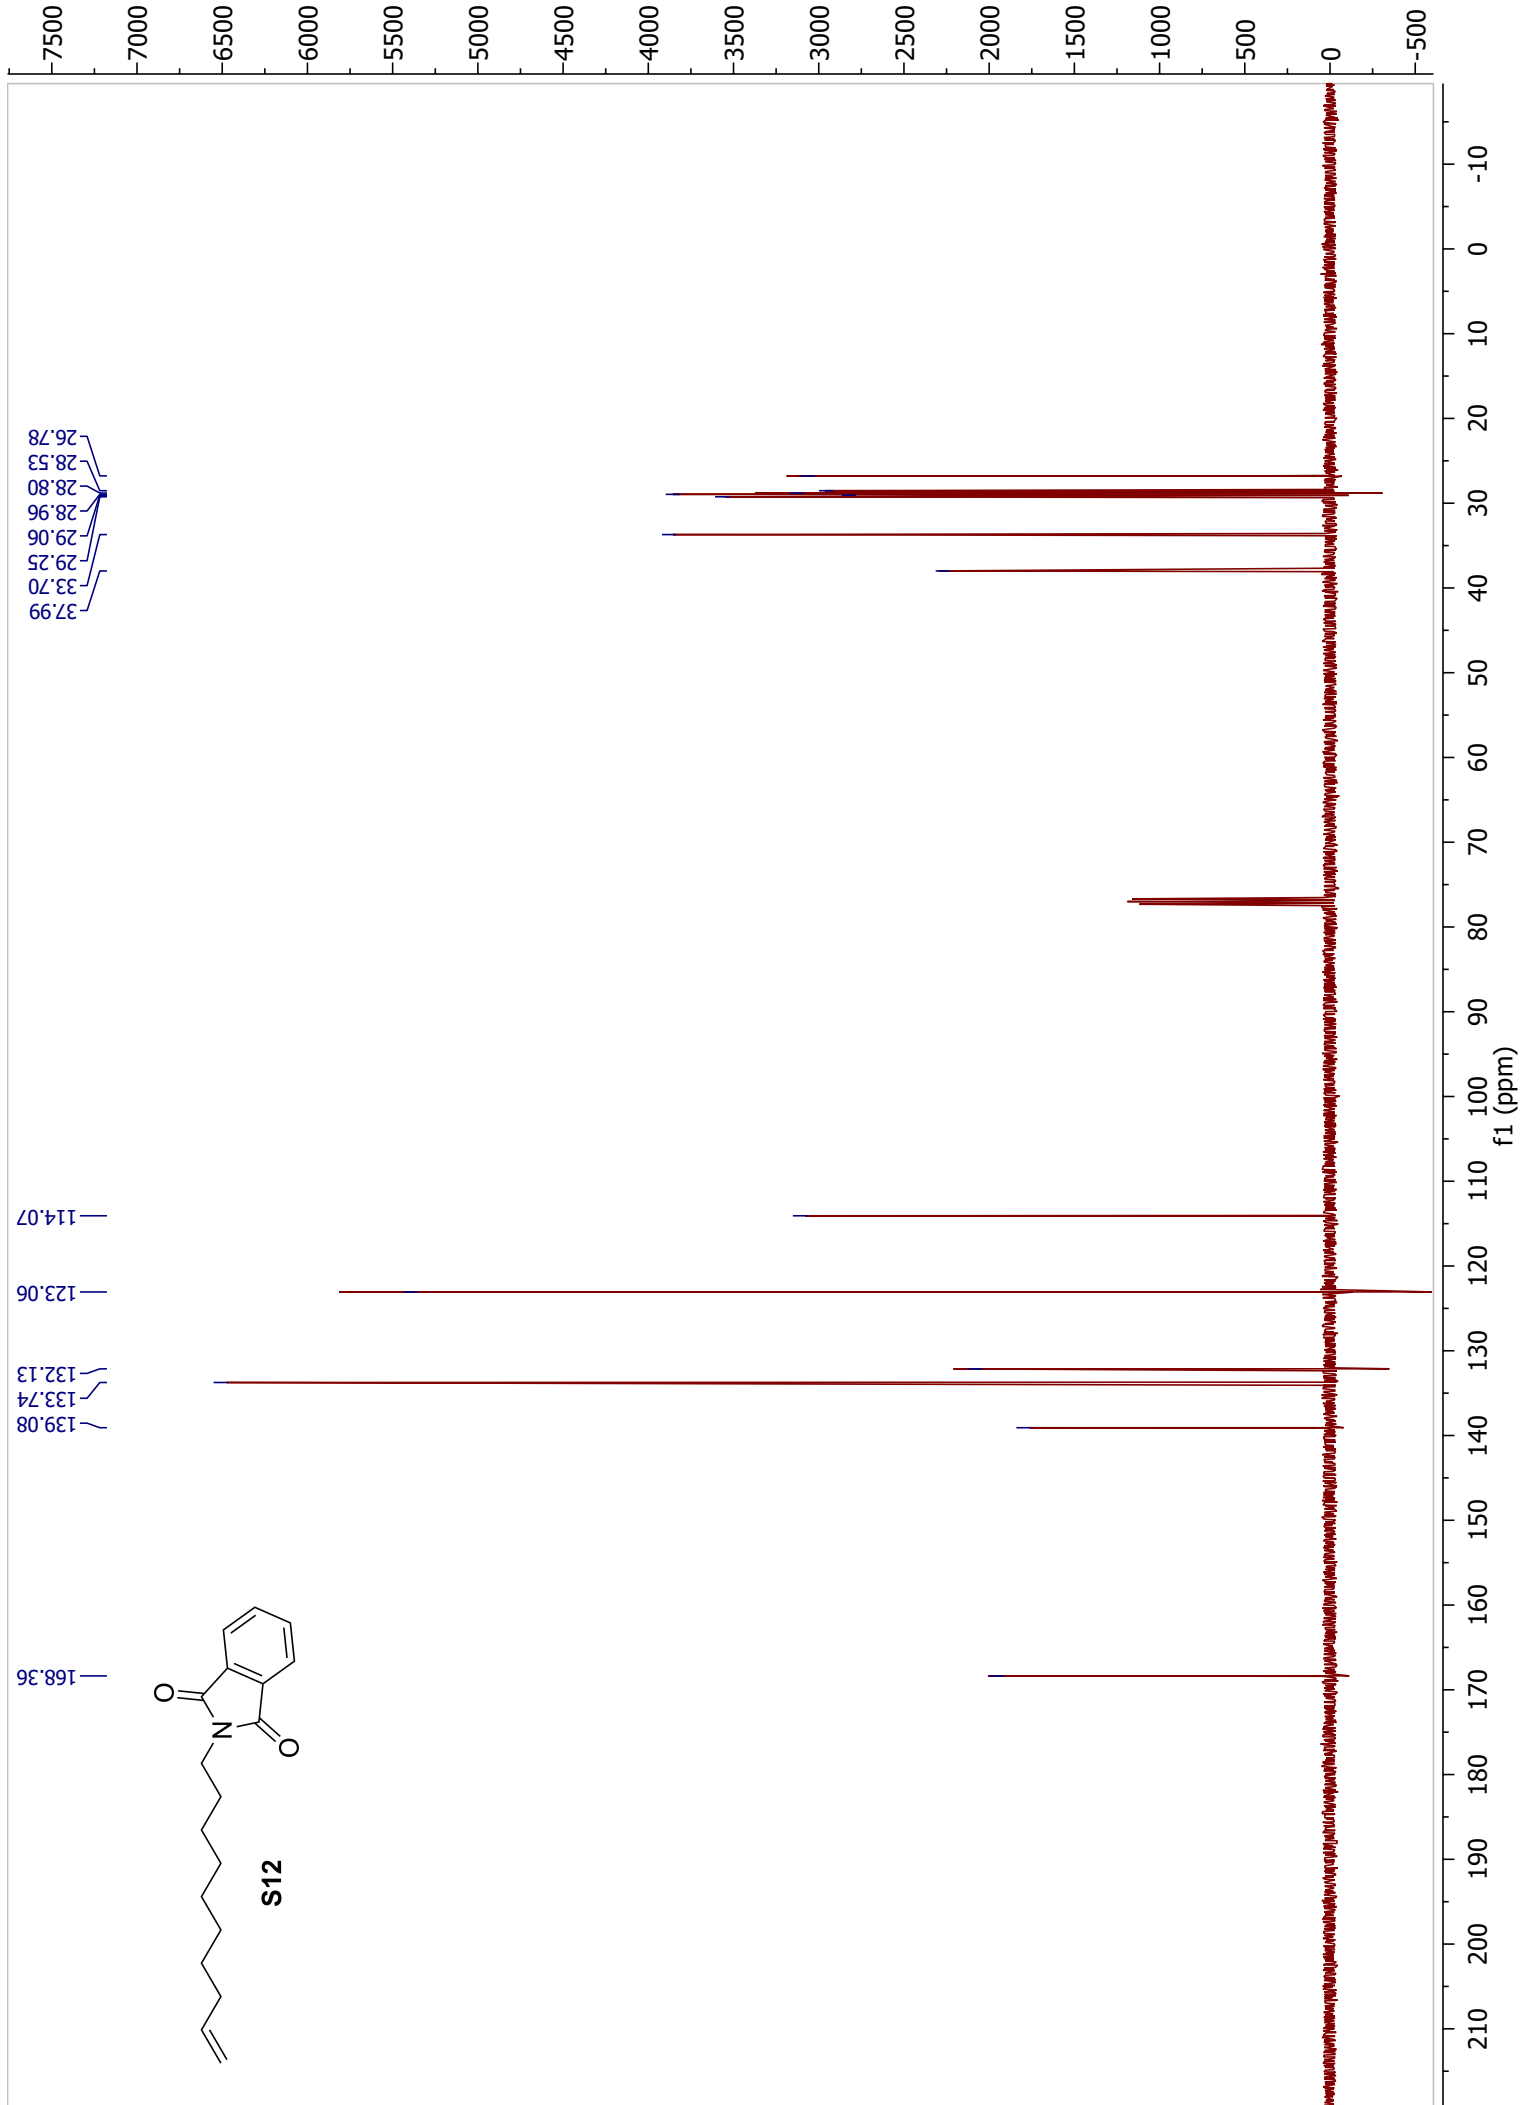

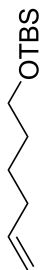

S13

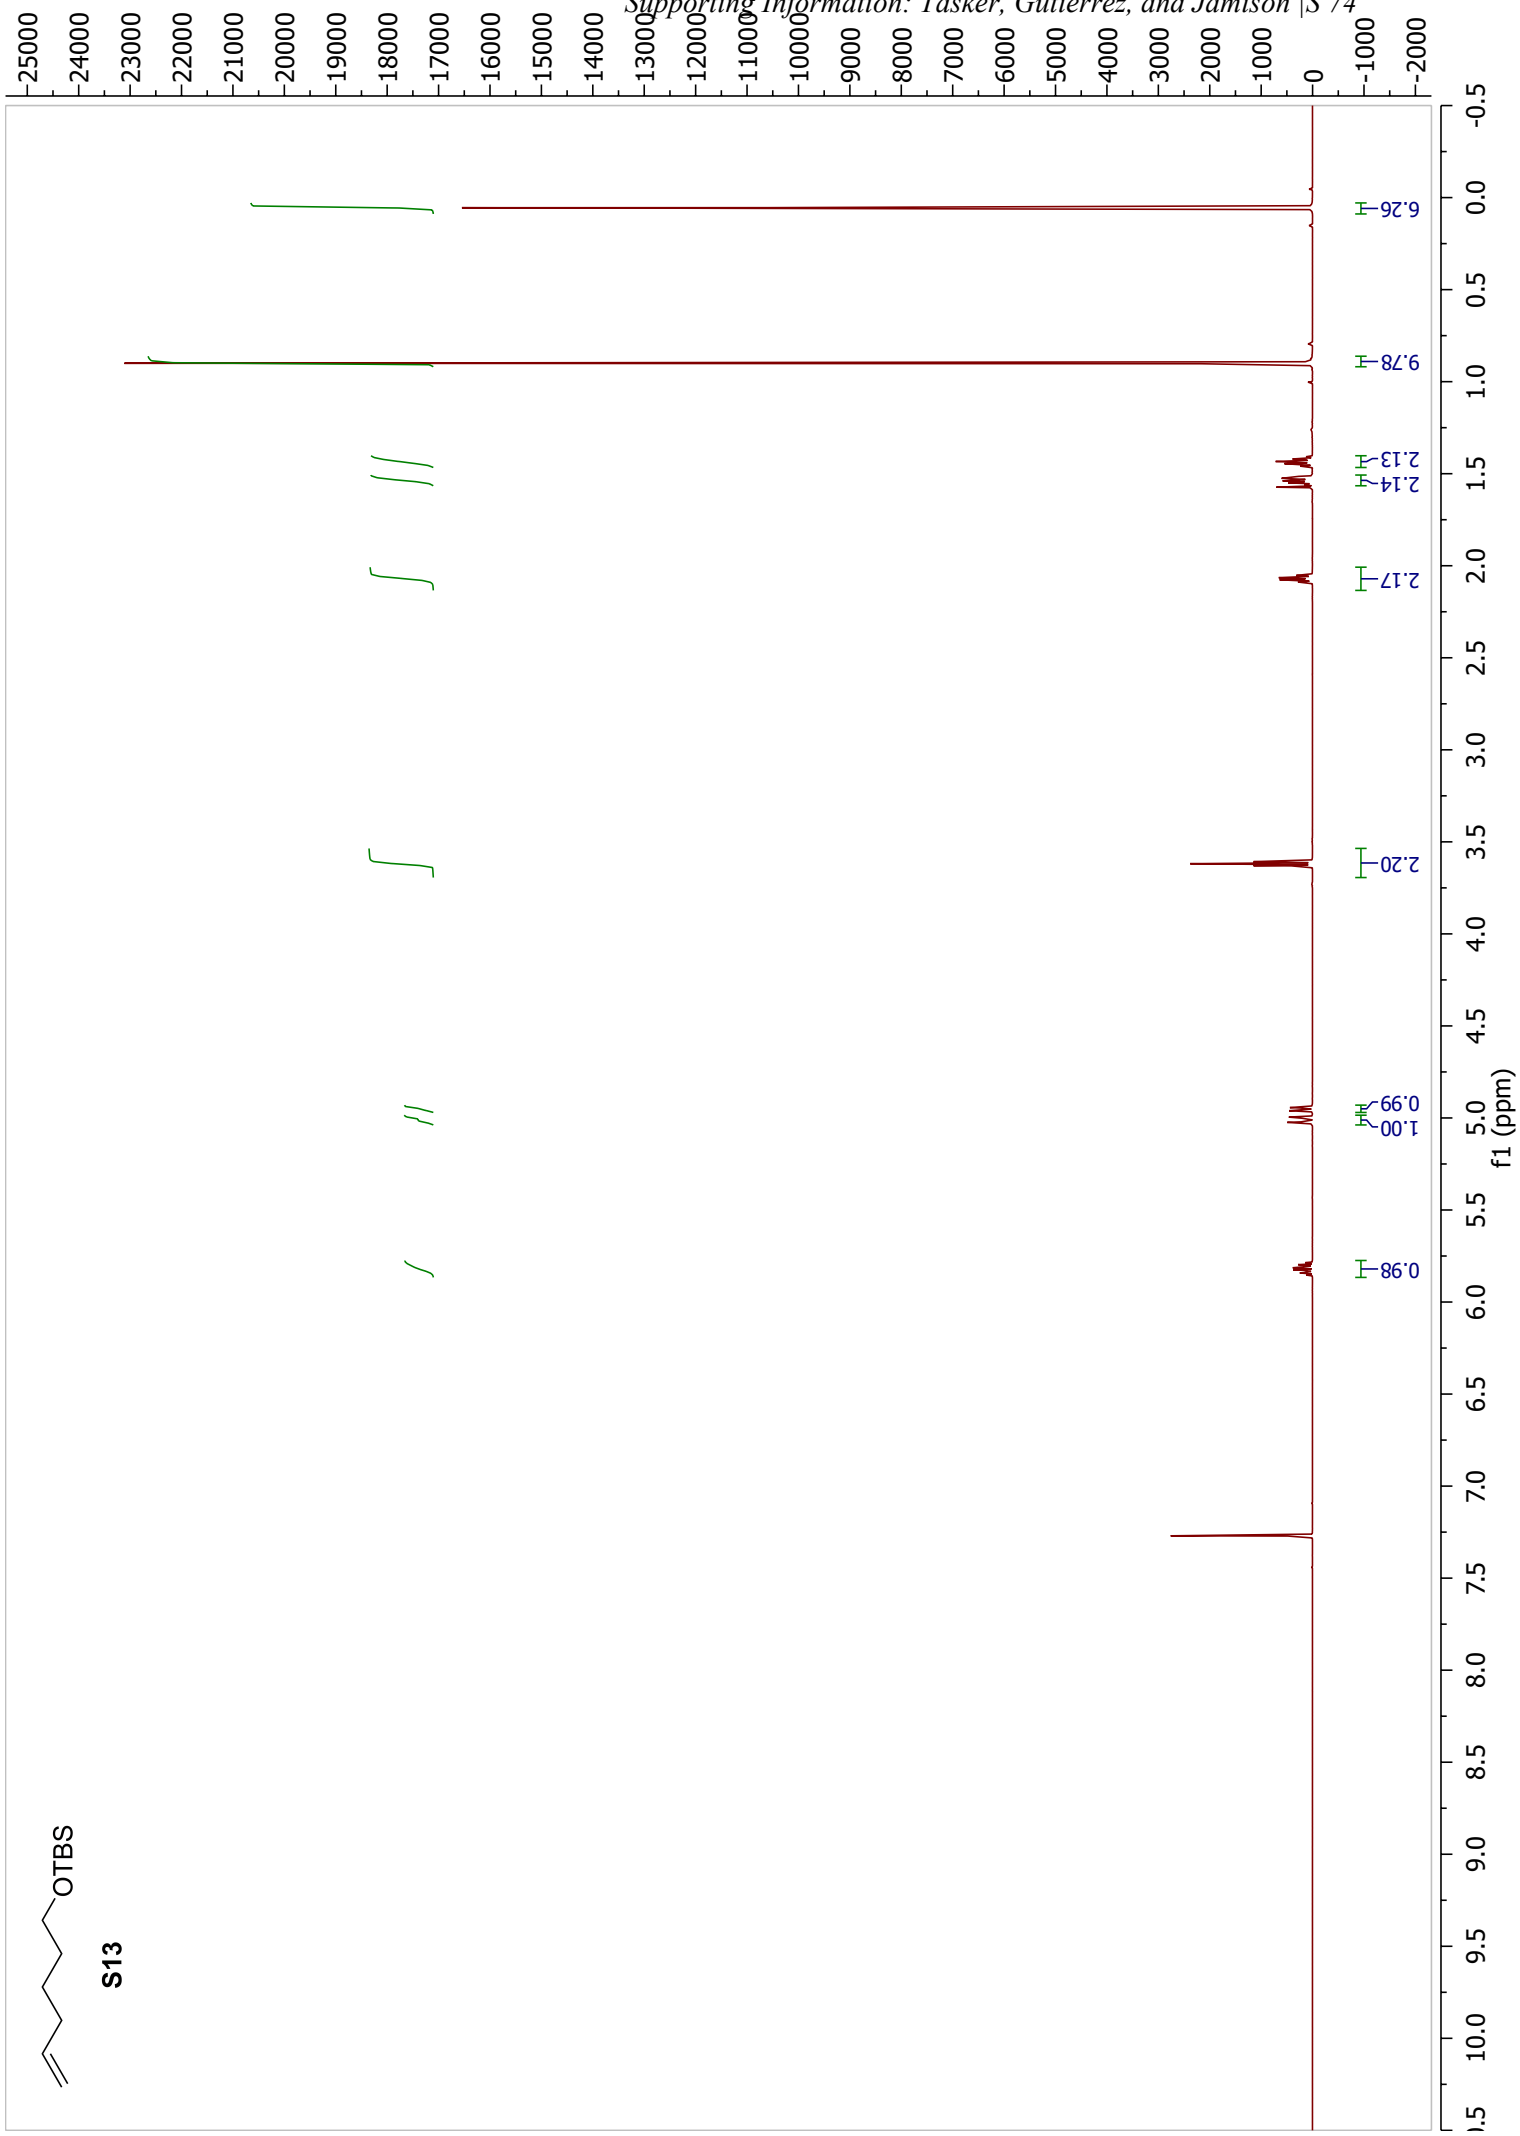

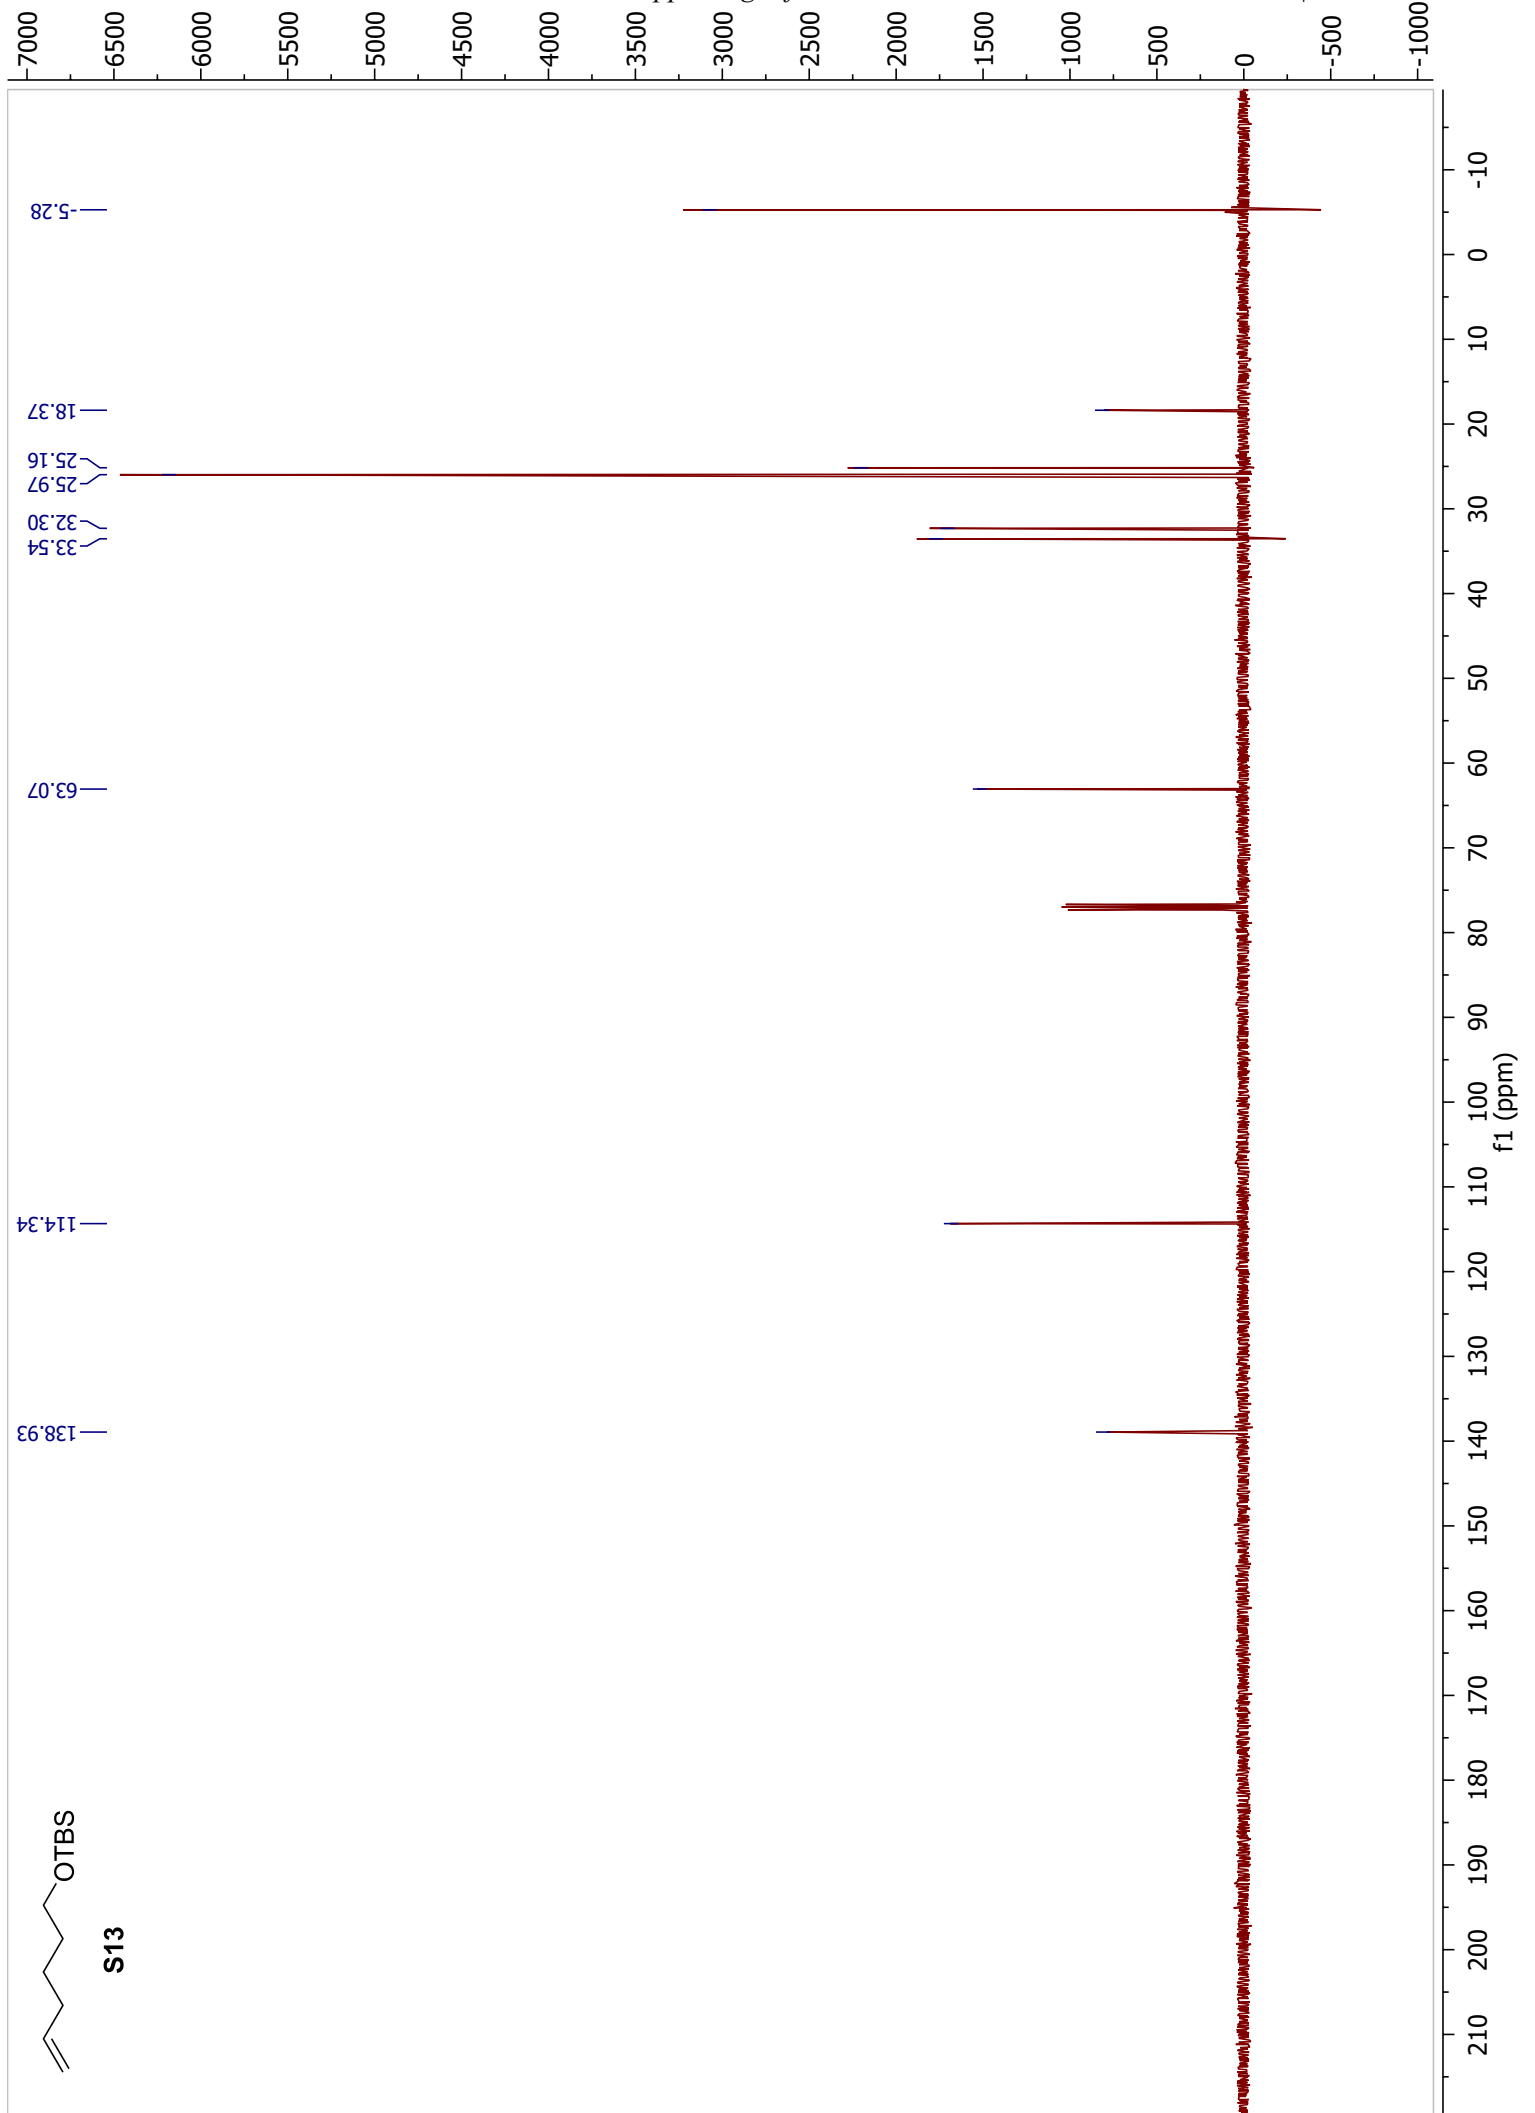

Supplement: NIHMS566067-supplement-Supporting_Information.pdf [file NIHMS566067-supplement-Supporting_Information.pdf]
